# Supplementary material for: Discovering novel pharmacogenomic biomarkers by imputing drug response in cancer patients from large genomics studies
Source: HighWire-hosted journal article supplement (doi:10.1101/gr.221077.117), 2017-08-28
Supplement: Supplemental_Fig_S1.pdf [file Supplemental_Fig_S1.pdf]

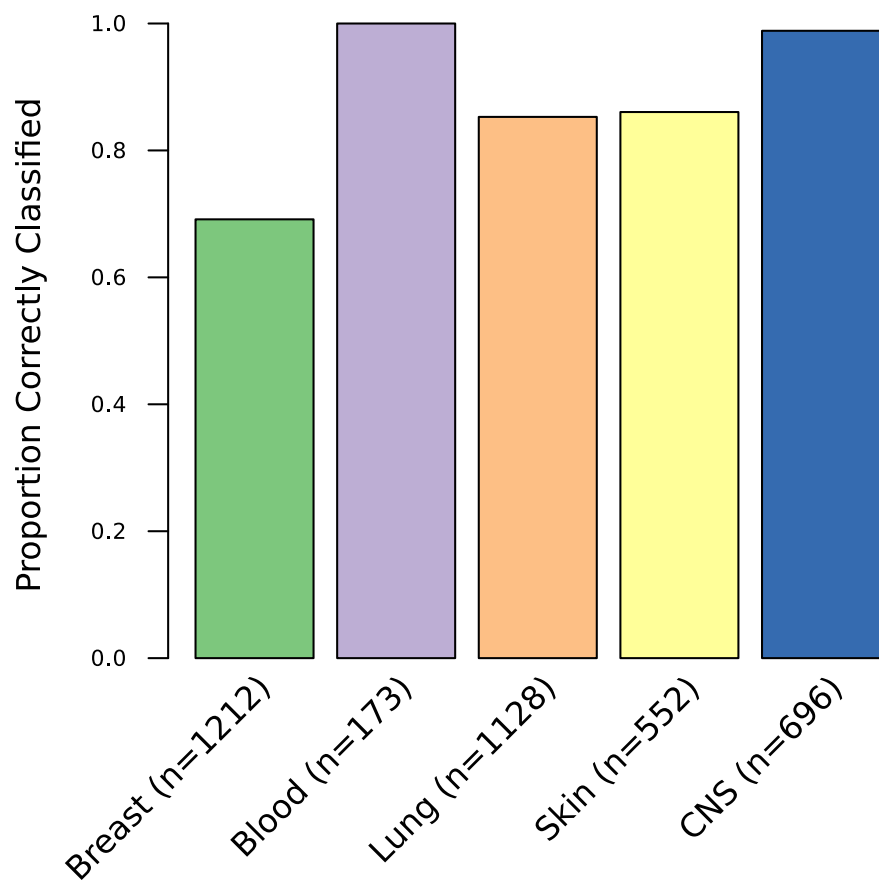

Figure 1: Barplot showing classification accuracy on batch corrected TCGA RNA-seq data. Note that for un-batch corrected RNA-seq data, classification accuracy is slightly lower than for the batch corrected data (3,029 compared to 3,136;  $P = 1.5 \times 10^{-3}$ ). This suggests that the batch correction procedures were effective. See Methods for description of batch correction procedure.
