# Supplementary material for: Discovering novel pharmacogenomic biomarkers by imputing drug response in cancer patients from large genomics studies
Source: HighWire-hosted journal article supplement (doi:10.1101/gr.221077.117), 2017-08-28
Supplement: Supplemental_Fig_S10.pdf [file Supplemental_Fig_S10.pdf]

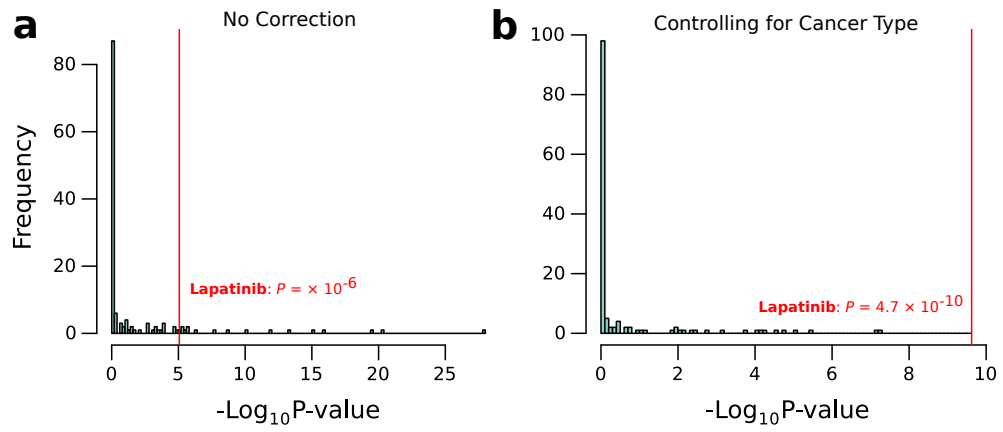

Figure 10: P-value for difference in predicted lapatinib response between ERBB2+ and ERBB2- TCGA samples. These P-values are derived across the entire dataset when (a) calculating the association with no correction or (b) calculating the association when controlling for tissue-of-origin.
