# Supplementary material for: Discovering novel pharmacogenomic biomarkers by imputing drug response in cancer patients from large genomics studies
Source: HighWire-hosted journal article supplement (doi:10.1101/gr.221077.117), 2017-08-28
Supplement: Supplemental_Table_S1.xlsx [file Supplemental_Table_S1.xlsx]

## Sheet: Supp Table 1
Supplementary Table 1: Information on imputed lapatinib response and ERBB2 status by IHC or FISH. Also included: whether the patient received a ERBB2 targeted therapy (e.g. Herceptin, lapatinib). NOTE: Lower values of "Imputed_Lapatinib_Response" imply greater drug sensitivity.
TCGA_Sample_ID	Imputed_Lapatinib_Response	ERBB2_Status_by_IHC	ERBB2_Status_by_FISH	Patient_Rx_ERBB2_Therapy
AAAU	4.78945	Negative	[Not Evaluated]	NO
AALI	3.94654	Positive	[Not Evaluated]	NO
AALJ	4.49074	Indeterminate	[Not Evaluated]	YES
AALK	3.71142	Positive	[Not Evaluated]	YES
AAAK	3.99785	Equivocal	[Not Evaluated]	NO
AAT0	4.12002	Negative	[Not Evaluated]	NO
AAT1	3.74662	Equivocal	[Not Evaluated]	NO
A9QA	3.61739	Equivocal	Negative	NO
A0SB	4.34743	Negative	[Not Evaluated]	NO
A0SD	4.20583	Negative	[Not Evaluated]	NO
A0SE	3.85386	Negative	Negative	NO
A0SF	3.71948	Negative	[Not Evaluated]	NO
A0SG	3.70335	Negative	[Not Evaluated]	NO
A0SH	3.28155	Equivocal	Negative	NO
A0SI	3.91495	Negative	[Not Evaluated]	NO
A0SJ	3.88994	Equivocal	Negative	NO
A0SK	5.76799	Negative	[Not Evaluated]	NO
A0SM	3.55643	Positive	Positive	NO
A0SN	3.71816	Positive	[Not Evaluated]	YES
A0SO	5.13455	Equivocal	Negative	NO
A0SP	4.56085	Negative	[Not Evaluated]	NO
A0SQ	4.393	Negative	[Not Evaluated]	NO
A04N	3.7791	[Not Evaluated]	Negative	NO
A04P	4.06572	[Not Evaluated]	Negative	NO
A04Q	4.05894	Equivocal	Negative	NO
A04R	4.18461	Equivocal	Negative	NO
A04T	4.75208	Equivocal	Negative	NO
A04U	4.19795	Negative	Positive	NO
A04V	4.31029	Equivocal	Negative	NO
A04W	3.26949	Positive	Positive	YES
A04X	3.70073	Positive	Positive	YES
A04Y	3.94771	Negative	Negative	YES
A0CK	4.27024	Negative	Negative	NO
A0CL	4.26866	Negative	Negative	NO
A0CM	4.81312	Negative	[Not Evaluated]	NO
A0CO	4.12059	Negative	Negative	NO
A0CP	3.70705	[Not Evaluated]	Negative	NO
A0CQ	3.70212	Equivocal	Negative	NO
A0CR	3.81978	Negative	Negative	NO
A0CS	3.55171	Equivocal	Negative	NO
A0CT	3.6566	Equivocal	Negative	NO
A0CU	4.10818	Equivocal	Negative	NO
A0CV	3.86061	Negative	Negative	NO
A0CW	4.11585	Equivocal	Negative	NO
A0CX	3.36816	Positive	[Not Evaluated]	YES
A0CY	3.46063	Negative	Negative	NO
A0CZ	3.68216	Negative	Negative	NO
A0D0	4.47813	Negative	Negative	NO
A0D1	4.20059	Positive	Positive	YES
A0D2	4.42592	Negative	Negative	NO
A0D3	4.06151	Negative	Negative	YES
A0D4	4.26585	Negative	Negative	NO
A0EM	3.96056	[Not Evaluated]	Negative	NO
A0EN	3.92231	Equivocal	Negative	NO
A0EO	3.47182	Negative	Negative	NO
A0EP	4.25286	Negative	Negative	NO
A0EQ	3.94714	Positive	Negative	YES
A0ER	4.22918	Equivocal	Negative	NO
A0ES	3.92705	Negative	Negative	NO
A0ET	4.87126	Equivocal	Negative	NO
A0EU	3.70203	Negative	Negative	NO
A0EV	3.78325	Negative	Negative	NO
A0EW	4.12997	Negative	Negative	NO
A0EX	3.6257	Negative	Negative	NO
A0EY	3.78121	Positive	Positive	YES
A0ST	4.24219	[Not Evaluated]	Negative	NO
A0SU	4.06485	Negative	[Not Evaluated]	NO
A0SV	3.80584	Equivocal	Negative	NO
A0SW	3.67478	[Not Evaluated]	Negative	NO
A0SX	4.57771	Negative	[Not Evaluated]	NO
A0SY	3.95319	[Not Evaluated]	Positive	YES
A0T0	4.44287	Negative	[Not Evaluated]	NO
A0T1	3.5543	Positive	[Not Evaluated]	YES
A0T2	4.05767	Negative	[Not Evaluated]	NO
A0T3	4.06618	Equivocal	Negative	NO
A0T4	3.85163	Equivocal	Negative	NO
A0T5	3.72405	Negative	Negative	NO
A0T6	4.13491	Negative	[Not Evaluated]	NO
A0T7	3.80126	Negative	[Not Evaluated]	NO
A0YC	4.2836	[Not Evaluated]	Negative	NO
A0YD	4.0393	[Not Evaluated]	Negative	NO
A0YE	4.49851	Negative	[Not Evaluated]	NO
A0YF	4.23517	Negative	[Not Evaluated]	NO
A0YG	4.24388	Positive	[Not Evaluated]	YES
A0YH	3.82523	Negative	[Not Evaluated]	NO
A0YI	4.09711	Negative	[Not Evaluated]	NO
A0YJ	4.4709	Negative	[Not Evaluated]	NO
A0YK	4.30052	Negative	[Not Evaluated]	NO
A0YL	4.25672	Negative	[Not Evaluated]	NO
A0YM	4.83671	[Not Evaluated]	Negative	NO
A0YT	3.74694	[Not Evaluated]	Negative	NO
A1FV	5.0416	Negative	Negative	NO
A1FW	4.77601	Negative	[Not Evaluated]	NO
A1FX	4.53251	[Not Evaluated]	Negative	NO
A1FZ	3.91504	Negative	[Not Evaluated]	NO
A1G0	4.45001	Equivocal	Negative	NO
A1G1	4.10678	Equivocal	Positive	NO
A1G4	4.5246	Negative	[Not Evaluated]	NO
A1G6	3.95708	Negative	[Not Evaluated]	NO
A259	4.17514	Negative	Negative	NO
A25A	4.21606	Equivocal	Negative	NO
A25B	4.0817	Equivocal	Negative	NO
A25C	4.23394	Negative	[Not Evaluated]	NO
A25D	3.91366	Negative	Negative	NO
A25E	4.00973	Equivocal	Equivocal	YES
A25F	4.68572	Negative	[Not Evaluated]	NO
A3KC	4.13737	Equivocal	Negative	NO
A3KD	3.88625	Negative	Negative	NO
A3XS	4.39118	[Not Evaluated]	Negative	NO
A3XT	4.87785	Negative	Negative	NO
A3XU	4.0398	[Not Evaluated]	Negative	NO
A3XV	2.9625	Equivocal	Positive	YES
A3XW	3.10259	Negative	Negative	NO
A3XX	4.54293	Negative	Negative	NO
A3XY	4.4255	Negative	Negative	NO
A3XZ	4.28417	Positive	[Not Evaluated]	YES
A3Y0	4.08093	Negative	[Not Evaluated]	NO
A4RW	4.06803	Negative	[Not Evaluated]	NO
A4RX	4.53802	Negative	[Not Evaluated]	NO
A4RY	4.27778	Negative	[Not Evaluated]	NO
A4S0	4.85039	Negative	[Not Evaluated]	NO
A4S1	4.2775	Negative	[Not Evaluated]	NO
A4S2	4.2308	Negative	[Not Evaluated]	NO
A4S3	3.84417	Negative	[Not Evaluated]	NO
A0CD	4.03973	Equivocal	Negative	NO
A0CE	4.39734	Equivocal	Negative	NO
A0CG	3.74833	Negative	[Not Evaluated]	NO
A0CH	3.95803	[Not Evaluated]	[Not Evaluated]	NO
A0CJ	4.42412	Negative	[Not Evaluated]	NO
A0D9	4.22971	Negative	[Not Evaluated]	NO
A0DA	4.3321	Negative	[Not Evaluated]	NO
A0DB	3.84481	Negative	[Not Evaluated]	NO
A13D	4.08803	Equivocal	Negative	NO
A13E	4.46594	Equivocal	Negative	NO
A13F	3.47216	Equivocal	Negative	NO
A13G	4.10944	Negative	[Not Evaluated]	NO
A13H	4.21897	Equivocal	Negative	NO
A26E	4.24204	Negative	[Not Evaluated]	NO
A26F	3.81176	Equivocal	Negative	NO
A26G	3.78766	Negative	[Not Evaluated]	NO
A26H	3.77528	Equivocal	Positive	NO
A26I	4.47299	Equivocal	Negative	NO
A26J	4.38035	Negative	[Not Evaluated]	NO
A2KD	4.04715	Positive	[Not Evaluated]	YES
A3IY	3.70515	Negative	[Not Evaluated]	NO
A3IZ	4.80524	Equivocal	Negative	NO
A3J0	4.7388	Negative	[Not Evaluated]	NO
A3J1	4.13986	Negative	[Not Evaluated]	NO
A3RF	4.73096	Negative	[Not Evaluated]	NO
A425	4.2779	Indeterminate	Negative	NO
A426	4.10849	Negative	[Not Evaluated]	NO
A4SA	4.18562	Negative	[Not Evaluated]	NO
A4SB	4.19095	Negative	[Not Evaluated]	NO
A4SC	4.08039	Equivocal	Negative	NO
A4SD	4.36281	Equivocal	Negative	NO
A4SE	4.71625	Negative	[Not Evaluated]	NO
A4SF	4.00338	Positive	[Not Evaluated]	YES
A56D	3.36044	Negative	[Not Evaluated]	NO
A5ZV	3.72594	Equivocal	Negative	NO
A5ZW	3.67793	Negative	[Not Evaluated]	NO
A5ZX	3.82322	Negative	[Not Evaluated]	NO
A6VV	4.30562	Negative	[Not Evaluated]	NO
A6VW	3.76821	Negative	[Not Evaluated]	NO
A6VX	3.81229	Negative	[Not Evaluated]	NO
A6VY	4.13653	Negative	[Not Evaluated]	NO
A06N	4.77675	Negative	Negative	NO
A06O	4.0505	Negative	Negative	NO
A06P	3.9676	Negative	Negative	NO
A06Q	4.06295	Negative	Negative	NO
A06R	4.44947	Positive	Positive	NO
A06T	4.31042	Positive	Positive	NO
A06U	3.9388	Positive	Positive	NO
A06X	4.28357	Positive	Positive	NO
A06Y	3.79066	Negative	Negative	NO
A06Z	4.10524	Negative	Negative	NO
A075	3.94129	Positive	Positive	NO
A076	3.89758	Positive	Positive	NO
A079	4.07922	Negative	Negative	NO
A07B	3.83015	Positive	Positive	NO
A07C	5.02803	Negative	Negative	NO
A07E	4.32031	Negative	Negative	NO
A07F	4.00614	Negative	Negative	NO
A07G	3.46917	Negative	Negative	NO
A07I	4.22907	Positive	Positive	YES
A07J	3.75094	Negative	Negative	NO
A07L	4.69029	Negative	Negative	NO
A07O	4.4402	Negative	Negative	NO
A07P	3.8405	Positive	Positive	NO
A07R	4.29039	Positive	[Not Available]	NO
A07S	4.08929	Negative	Negative	NO
A07U	4.14398	Negative	Negative	NO
A07W	4.14845	Negative	Negative	NO
A07Z	3.91149	Negative	Negative	NO
A081	3.99968	Negative	Negative	NO
A082	4.41235	Negative	Negative	NO
A083	4.26319	Negative	Negative	NO
A084	4.06901	Negative	Negative	NO
A085	4.38334	Negative	Negative	NO
A086	4.22723	Negative	Negative	NO
A08A	3.917	Negative	Negative	NO
A08B	3.70163	Positive	Positive	YES
A08C	4.39799	Positive	Positive	NO
A08F	4.3527	Negative	Negative	NO
A08G	4.40542	Positive	Positive	NO
A08H	4.09652	Positive	Positive	NO
A08I	4.60018	Negative	Negative	NO
A08J	3.91545	Negative	Negative	NO
A08L	4.51836	Negative	Negative	NO
A08O	4.35603	Negative	Negative	NO
A08P	3.85342	Positive	Positive	YES
A08R	4.51593	Negative	Negative	NO
A08S	4.07389	Positive	Positive	NO
A08T	4.30341	Positive	Positive	NO
A08X	3.99293	Positive	Positive	YES
A08Z	4.61226	Negative	Negative	NO
A090	4.08601	Positive	Positive	NO
A091	4.71916	Negative	Negative	NO
A092	3.82685	Negative	Negative	NO
A093	4.27831	Negative	Negative	NO
A094	3.39183	Negative	Negative	NO
A095	4.01509	Negative	Negative	NO
A096	4.01876	Negative	Negative	NO
A097	3.87318	Positive	Positive	NO
A099	3.90383	Positive	Positive	NO
A09A	3.84301	Negative	Negative	NO
A09B	4.18701	Negative	Negative	NO
A09C	3.96847	Negative	Negative	NO
A09D	3.95509	Negative	Negative	NO
A09E	3.7207	Positive	Positive	NO
A09G	4.08597	Positive	Positive	NO
A09I	3.83904	Positive	Positive	NO
A09K	4.76598	Negative	Negative	NO
A09M	3.8193	Negative	Negative	NO
A09N	3.92787	Positive	Positive	NO
A09Q	4.2834	Negative	Negative	NO
A09R	4.7021	Negative	Negative	NO
A09T	3.80541	Negative	Negative	NO
A09V	4.59676	Negative	Negative	NO
A09W	3.39876	Negative	Negative	NO
A09X	3.52271	Negative	Negative	NO
A09Z	3.81957	Negative	Negative	NO
A0A1	4.14256	Negative	Negative	NO
A0A2	4.30553	Negative	Negative	NO
A0A4	3.94662	Negative	Negative	NO
A0A6	3.73166	Negative	Negative	NO
A0A7	3.47045	Positive	Positive	NO
A0A9	4.40707	Negative	Negative	NO
A0AB	4.16823	Positive	Positive	NO
A0AD	4.25119	Negative	Negative	NO
A23C	3.933	Positive	Positive	NO
A23E	4.01869	[Not Evaluated]	[Not Evaluated]	NO
A23G	3.79631	Positive	Positive	NO
A23H	3.46133	Positive	Positive	NO
A2B8	4.03889	Negative	Negative	NO
A2BK	4.57079	Negative	[Not Evaluated]	NO
A2BM	4.49599	[Not Evaluated]	Negative	NO
A2FB	4.05542	Positive	[Not Evaluated]	YES
A2FE	4.05401	[Not Evaluated]	[Not Evaluated]	NO
A2FF	4.17511	[Not Evaluated]	Negative	NO
A2FG	3.86096	[Not Evaluated]	Negative	NO
A2FK	3.96899	[Not Evaluated]	Negative	NO
A2FM	4.64426	[Not Evaluated]	[Not Evaluated]	NO
A2FO	4.08559	Negative	Indeterminate	NO
A2QH	4.79236	Negative	[Not Evaluated]	NO
A2QI	4.18363	Negative	[Not Evaluated]	NO
A2QJ	3.67502	Negative	[Not Evaluated]	NO
A3BB	3.8977	Negative	[Not Evaluated]	NO
A3EH	3.67373	Negative	Negative	NO
A3HN	4.11707	Negative	[Not Evaluated]	NO
A3OD	4.07815	Negative	[Not Evaluated]	NO
A3QP	3.6232	Equivocal	Negative	NO
A3QQ	3.59409	Positive	[Not Evaluated]	NO
A3TM	3.63734	Equivocal	Equivocal	NO
A3TN	3.76365	Positive	Indeterminate	NO
A3W5	3.68234	[Not Evaluated]	Positive	YES
A3W6	4.26368	Negative	[Not Evaluated]	NO
A3W7	4.11443	Negative	[Not Evaluated]	NO
A3YI	4.03938	Positive	[Not Evaluated]	NO
A3YJ	3.92964	[Not Available]	[Not Available]	NO
A4ZE	4.48298	Positive	[Not Evaluated]	NO
A5EH	3.73037	Negative	[Not Evaluated]	NO
A5XS	3.76055	Negative	[Not Evaluated]	NO
A5XU	4.88904	Negative	[Not Evaluated]	NO
A62V	3.64236	[Not Evaluated]	[Not Evaluated]	NO
A62X	3.91228	[Not Evaluated]	[Not Evaluated]	NO
A62Y	4.00883	Negative	[Not Evaluated]	NO
A6IV	4.49884	Equivocal	[Not Evaluated]	NO
A6IW	4.5914	Negative	[Not Evaluated]	NO
A6IX	4.02472	[Not Evaluated]	[Not Evaluated]	NO
A6NO	4.38208	Negative	[Not Evaluated]	NO
A7VB	4.69033	[Not Evaluated]	[Not Evaluated]	NO
A7VC	4.4944	Negative	[Not Evaluated]	NO
A8OP	4.05274	Indeterminate	[Not Evaluated]	NO
A8OQ	4.52316	Indeterminate	[Not Evaluated]	NO
A8OR	4.06577	Negative	[Not Evaluated]	NO
A8OS	4.08527	Positive	[Not Evaluated]	NO
A03X	3.41206	Positive	[Not Evaluated]	NO
A03Y	4.04603	Negative	[Not Evaluated]	NO
A041	4.18332	Positive	[Not Evaluated]	NO
A046	4.03095	Negative	[Not Evaluated]	NO
A049	4.0762	Negative	[Not Evaluated]	NO
A04A	4.01599	Negative	[Not Evaluated]	NO
A04C	3.38551	Positive	[Not Evaluated]	NO
A04D	4.57184	Negative	[Not Evaluated]	NO
A0AJ	4.25191	Positive	[Not Evaluated]	NO
A0AK	4.05328	Positive	[Not Evaluated]	NO
A0AL	3.68398	Negative	[Not Evaluated]	NO
A0AM	3.54789	Negative	[Not Evaluated]	NO
A0AR	4.25688	Negative	[Not Evaluated]	NO
A0AS	3.8575	Negative	[Not Evaluated]	NO
A0AT	4.86456	Negative	[Not Evaluated]	NO
A0FD	4.0343	Positive	Positive	NO
A0FF	4.18699	Negative	[Not Evaluated]	NO
A0FJ	4.49984	Positive	[Not Evaluated]	NO
A0FK	3.74331	Positive	[Not Evaluated]	NO
A0FL	3.07873	Positive	[Not Evaluated]	NO
A0FN	3.98105	Positive	[Not Evaluated]	NO
A0FS	3.79777	Positive	[Not Evaluated]	NO
A0FT	3.17104	Positive	[Not Evaluated]	NO
A0FV	3.75635	Positive	[Not Evaluated]	NO
A0FW	4.18156	Negative	[Not Evaluated]	NO
A0FX	4.49054	Positive	[Not Evaluated]	NO
A0FY	4.48287	Negative	[Not Evaluated]	NO
A0FZ	4.00451	Positive	[Not Evaluated]	NO
A0G0	4.1259	Negative	[Not Evaluated]	NO
A0XL	4.02513	Negative	[Not Evaluated]	NO
A0XN	4.0129	Negative	[Not Evaluated]	NO
A0XO	3.85127	Negative	[Not Evaluated]	NO
A0XP	3.92438	Positive	[Not Evaluated]	NO
A0XR	4.21245	Negative	[Not Evaluated]	NO
A0XS	4.05104	Negative	[Not Evaluated]	NO
A0XT	4.55425	Negative	[Not Evaluated]	NO
A0XU	4.47644	Negative	[Not Evaluated]	NO
A0XV	3.88128	Positive	Negative	NO
A0XW	4.0926	Positive	Negative	NO
A03L	3.91674	Positive	Negative	NO
A03O	4.32008	Negative	Negative	NO
A03P	4.42097	Negative	[Not Evaluated]	NO
A03R	3.89229	Negative	Negative	NO
A03T	3.53159	Negative	[Not Evaluated]	NO
A03V	4.40331	Negative	[Not Evaluated]	NO
A0J2	3.48483	Equivocal	Negative	NO
A0J3	4.93856	Equivocal	Negative	NO
A0J4	4.47586	Negative	[Not Evaluated]	NO
A0J5	3.70194	Equivocal	Negative	NO
A0J6	4.0756	Negative	[Not Evaluated]	NO
A0J7	4.37141	Negative	[Not Evaluated]	NO
A0J8	3.83746	Negative	[Not Evaluated]	NO
A0J9	3.90054	[Not Evaluated]	Negative	NO
A0JA	3.87214	Negative	[Not Evaluated]	NO
A0JB	3.52731	Negative	[Not Evaluated]	NO
A0JC	4.65873	Negative	[Not Evaluated]	NO
A0JD	3.80152	Negative	Negative	NO
A0JE	3.3692	Positive	Positive	YES
A0JF	3.53828	Negative	[Not Evaluated]	NO
A0JG	4.37011	Negative	[Not Evaluated]	NO
A0JI	4.37053	Negative	[Not Evaluated]	NO
A0JJ	3.73623	Negative	[Not Evaluated]	NO
A0JL	4.24975	Negative	Positive	YES
A0JM	3.6741	Positive	Positive	YES
A124	4.62416	Negative	[Not Evaluated]	NO
A125	4.02463	Negative	Negative	NO
A126	3.66838	Negative	Negative	NO
A128	4.41432	Negative	Negative	NO
A129	4.16869	Negative	Negative	NO
A12A	3.98321	Negative	Negative	NO
A12B	4.07847	Negative	[Not Evaluated]	NO
A12C	4.28634	Positive	Negative	YES
A12D	3.60394	Positive	Positive	YES
A12E	3.94975	Negative	[Not Evaluated]	NO
A12F	4.72609	Negative	[Not Evaluated]	NO
A12G	3.58041	Positive	Negative	NO
A12H	4.43694	Negative	[Not Evaluated]	NO
A1KO	4.13035	Negative	[Not Evaluated]	NO
A1KP	4.27907	Negative	Negative	NO
A1KQ	4.18696	Negative	[Not Evaluated]	NO
A1KR	4.12866	Negative	Negative	NO
A1KS	4.63468	Equivocal	Negative	NO
A1KT	4.10361	Equivocal	Negative	NO
A04J	4.2202	Negative	[Not Evaluated]	NO
A0Y5	3.66842	Positive	Positive	YES
A1H2	4.02604	Indeterminate	Positive	YES
A1H3	4.18538	Negative	[Not Evaluated]	NO
A54N	4.4876	Equivocal	Negative	NO
A54O	3.80377	Negative	[Not Evaluated]	NO
A7U7	4.5888	Negative	[Not Evaluated]	NO
A0TP	4.31342	Negative	[Not Evaluated]	NO
A0TQ	4.03326	Equivocal	Positive	YES
A0TR	4.64356	Equivocal	Negative	NO
A0TS	4.83897	Negative	[Not Evaluated]	NO
A0TT	4.52698	Negative	[Not Evaluated]	NO
A0TU	4.79798	Negative	[Not Evaluated]	NO
A0TV	4.19792	Equivocal	Negative	NO
A0TW	3.98901	Equivocal	Negative	NO
A0TX	3.76579	Positive	[Not Evaluated]	NO
A0TY	3.7467	Negative	[Not Evaluated]	NO
A0TZ	4.71697	Equivocal	Negative	NO
A0U0	4.53767	[Not Evaluated]	[Not Evaluated]	NO
A0U2	5.07317	Negative	[Not Evaluated]	NO
A0U3	4.16161	Negative	[Not Evaluated]	NO
A0U4	4.59308	Negative	[Not Evaluated]	NO
A1AH	4.85612	Negative	[Not Evaluated]	NO
A1AI	4.71473	Equivocal	Negative	NO
A1AJ	4.64667	Negative	[Not Evaluated]	NO
A1AK	4.04017	Negative	[Not Evaluated]	NO
A1AL	4.22916	Negative	[Not Evaluated]	NO
A1AM	3.96149	Equivocal	Negative	NO
A1AN	4.11718	Negative	[Not Evaluated]	NO
A1AO	3.99484	Negative	[Not Evaluated]	NO
A1AP	3.8763	Equivocal	Negative	NO
A1AQ	4.57265	Equivocal	Negative	NO
A1AR	4.85049	Negative	[Not Evaluated]	NO
A1AS	4.01814	Negative	[Not Evaluated]	NO
A1AT	3.87915	Positive	[Not Evaluated]	YES
A1AU	4.19144	Equivocal	Negative	NO
A1AV	4.33242	Negative	[Not Evaluated]	NO
A1AW	4.61522	Equivocal	Negative	NO
A1AX	4.11623	Positive	[Not Evaluated]	YES
A1AY	4.64577	Negative	[Not Evaluated]	NO
A24H	4.78043	Negative	[Not Evaluated]	NO
A24K	4.36529	Equivocal	Negative	NO
A24L	4.17562	Equivocal	Negative	NO
A24M	3.6977	Negative	[Not Evaluated]	NO
A24N	3.8436	Equivocal	Negative	NO
A24O	4.1817	Negative	[Not Evaluated]	NO
A24P	4.08045	Equivocal	Negative	NO
A24Q	4.4441	Negative	[Not Evaluated]	YES
A24R	4.04286	Negative	Negative	NO
A24S	4.20117	Negative	[Not Evaluated]	NO
A24T	3.90263	Equivocal	Negative	NO
A24U	3.81954	Positive	[Not Evaluated]	YES
A24V	3.89808	Negative	[Not Evaluated]	NO
A24W	3.94942	Negative	[Not Evaluated]	NO
A24X	4.34527	Equivocal	Negative	NO
A24Z	4.39963	Negative	[Not Evaluated]	NO
A250	4.04246	Equivocal	Positive	YES
A251	4.5958	Equivocal	Negative	NO
A252	4.36788	Negative	[Not Evaluated]	NO
A254	4.09859	Positive	[Not Evaluated]	YES
A255	3.80991	Positive	[Not Evaluated]	YES
A256	4.64773	Negative	[Not Evaluated]	NO
A2LE	4.23208	[Not Evaluated]	[Not Evaluated]	NO
A2LH	3.78302	Equivocal	Negative	NO
A2LJ	3.82064	Positive	Positive	YES
A2LK	4.46183	Equivocal	Negative	NO
A2LL	4.34072	Equivocal	Negative	NO
A2LM	4.23355	[Not Evaluated]	Negative	NO
A2LN	4.06583	Negative	[Not Evaluated]	NO
A2LO	4.2789	Equivocal	Negative	NO
A2LQ	3.70609	Negative	[Not Evaluated]	NO
A2LR	4.94169	Negative	[Not Evaluated]	NO
A5QM	4.04309	Equivocal	[Not Available]	NO
A5QN	4.09999	Positive	[Not Available]	NO
A5QP	3.8291	Equivocal	[Not Available]	NO
A5QQ	3.52266	Negative	[Not Available]	NO
A0I1	4.25334	[Not Evaluated]	[Not Evaluated]	NO
A0I2	4.22051	[Not Evaluated]	[Not Evaluated]	NO
A0I5	3.66398	[Not Evaluated]	[Not Available]	NO
A0I6	4.76942	[Not Evaluated]	[Not Available]	NO
A0I8	3.65513	[Not Evaluated]	[Not Available]	NO
A0I9	4.07826	[Not Evaluated]	[Not Available]	NO
A0IA	3.70087	[Not Evaluated]	[Not Available]	NO
A0IB	3.70069	[Not Evaluated]	[Not Available]	NO
A0IC	4.42143	[Not Evaluated]	[Not Available]	NO
A0IE	3.18537	[Not Evaluated]	[Not Available]	NO
A0IG	3.60536	[Not Evaluated]	[Not Available]	NO
A0IH	3.95012	[Not Evaluated]	[Not Evaluated]	NO
A0IJ	4.48216	[Not Evaluated]	[Not Available]	NO
A0IK	3.74851	[Not Evaluated]	[Not Available]	NO
A0IM	4.56776	[Not Evaluated]	[Not Available]	NO
A0IN	3.77585	[Not Evaluated]	[Not Available]	NO
A0IO	3.95943	[Not Evaluated]	[Not Available]	NO
A0IP	3.9663	[Not Evaluated]	[Not Evaluated]	NO
A0IQ	5.07616	[Not Evaluated]	[Not Available]	NO
A0RE	4.16765	[Not Evaluated]	[Not Available]	NO
A0RG	3.70029	[Not Evaluated]	[Not Available]	NO
A0RH	3.51803	[Not Evaluated]	[Not Evaluated]	NO
A0RI	4.04215	[Not Evaluated]	[Not Available]	NO
A0RL	4.97319	[Not Evaluated]	[Not Available]	NO
A0RM	4.2815	[Not Evaluated]	[Not Available]	NO
A0RN	3.90642	[Not Evaluated]	[Not Available]	NO
A0RO	3.06612	[Not Evaluated]	[Not Available]	NO
A0RP	3.98439	[Not Evaluated]	[Not Available]	NO
A0RQ	3.66866	[Not Evaluated]	[Not Evaluated]	NO
A0RS	3.46206	[Not Evaluated]	[Not Available]	NO
A0RT	4.63269	[Not Evaluated]	[Not Available]	NO
A0RU	4.41847	[Not Evaluated]	[Not Available]	NO
A0RV	3.92697	[Not Evaluated]	[Not Available]	NO
A0WS	4.01252	[Not Evaluated]	[Not Evaluated]	NO
A0WT	4.29487	[Not Evaluated]	[Not Evaluated]	NO
A0WV	3.98426	[Not Evaluated]	[Not Evaluated]	NO
A0WW	3.59976	[Not Evaluated]	[Not Evaluated]	NO
A0WX	3.99892	[Not Evaluated]	[Not Evaluated]	NO
A0WY	3.4798	[Not Evaluated]	[Not Evaluated]	NO
A0WZ	3.77913	[Not Evaluated]	[Not Evaluated]	NO
A0X0	3.9607	[Not Evaluated]	[Not Evaluated]	NO
A0X1	4.40442	[Not Evaluated]	[Not Evaluated]	NO
A0X4	4.92003	[Not Evaluated]	[Not Evaluated]	NO
A0X5	3.96097	[Not Evaluated]	[Not Evaluated]	NO
A0X7	3.92211	[Not Evaluated]	[Not Evaluated]	NO
A1KF	4.21159	Equivocal	[Not Evaluated]	NO
A1KI	3.67909	Equivocal	Negative	NO
A1KN	4.09861	[Not Evaluated]	[Not Evaluated]	NO
A2IU	3.72418	[Not Evaluated]	[Not Evaluated]	NO
A3ZX	4.5288	Negative	[Not Evaluated]	NO
A400	4.37928	Negative	[Not Evaluated]	NO
A401	4.00982	Negative	[Not Evaluated]	NO
A402	4.64015	Negative	[Not Evaluated]	NO
A408	4.41926	Equivocal	Negative	NO
A409	3.68071	Equivocal	Negative	NO
A40B	3.85041	Negative	[Not Evaluated]	NO
A40C	4.46793	Negative	[Not Evaluated]	NO
A0AU	3.7277	Positive	Negative	NO
A0AV	4.66502	[Not Available]	Negative	NO
A0AW	3.25345	Positive	[Not Evaluated]	YES
A0AY	3.69081	Negative	[Not Evaluated]	NO
A0AZ	3.77386	Negative	[Not Available]	NO
A0B0	3.75728	Negative	[Not Available]	NO
A0B1	3.45883	Negative	[Not Evaluated]	NO
A0B3	4.15947	Negative	[Not Evaluated]	NO
A0B4	3.65483	Equivocal	Positive	NO
A0B5	4.38218	Negative	[Not Available]	NO
A0B6	3.51243	Positive	[Not Available]	NO
A0B7	3.85778	Positive	[Not Available]	NO
A0B8	4.13565	Equivocal	Negative	NO
A0B9	4.5301	Negative	[Not Evaluated]	NO
A0BA	4.0588	Negative	[Not Evaluated]	NO
A0BC	3.905	Negative	[Not Evaluated]	NO
A0BD	3.76691	Negative	[Not Evaluated]	NO
A0BF	3.95802	Negative	[Not Available]	NO
A0BG	4.09958	Negative	[Not Available]	NO
A0BJ	3.81158	Negative	[Not Evaluated]	NO
A0BL	4.43964	Negative	[Not Available]	NO
A0BM	3.54992	Negative	[Not Evaluated]	NO
A0BO	4.11149	Negative	[Not Available]	NO
A0BP	3.94145	Negative	[Not Available]	NO
A0BQ	3.57902	Positive	[Not Available]	NO
A0BR	3.78387	Negative	[Not Available]	NO
A0BS	3.63265	[Not Available]	Negative	NO
A0BT	3.39223	Negative	[Not Available]	NO
A0BV	4.2684	Negative	[Not Evaluated]	NO
A0BW	4.26812	[Not Available]	Negative	NO
A0BZ	3.95189	Negative	[Not Available]	NO
A0C0	3.4166	Equivocal	Positive	NO
A0C3	4.24375	Negative	[Not Available]	NO
A0DD	4.52803	Positive	Positive	NO
A0DE	4.03489	Negative	[Not Available]	NO
A0DG	3.74729	Negative	[Not Available]	NO
A0DH	3.37571	Negative	[Not Evaluated]	NO
A0DI	3.61955	Negative	[Not Available]	NO
A0DK	3.76354	Negative	[Not Evaluated]	NO
A0DL	3.76975	Negative	[Not Available]	NO
A0DP	3.73925	Negative	[Not Evaluated]	NO
A0DQ	3.88412	Negative	[Not Evaluated]	NO
A0DS	3.58248	Negative	[Not Evaluated]	NO
A0DT	3.89883	Negative	[Not Available]	NO
A0DV	3.65747	Negative	[Not Available]	NO
A0DX	3.85411	Negative	[Not Available]	NO
A0DZ	3.3434	Positive	[Not Evaluated]	YES
A0E0	4.44009	Negative	[Not Evaluated]	NO
A0E1	3.94587	Equivocal	Negative	NO
A0E2	3.84713	Negative	[Not Evaluated]	NO
A0E6	4.18436	Equivocal	Negative	NO
A0E7	3.81354	Negative	[Not Evaluated]	NO
A0EA	3.97446	Negative	[Not Available]	NO
A0EB	3.86961	Equivocal	Negative	NO
A0EE	3.7034	Positive	[Not Evaluated]	YES
A0EI	4.31262	Negative	[Not Available]	NO
A0GY	3.71708	Negative	[Not Evaluated]	NO
A0GZ	3.69413	Equivocal	Negative	NO
A0H0	4.34297	Negative	[Not Evaluated]	NO
A0H3	4.18855	[Not Available]	Negative	NO
A0H5	4.04841	[Not Available]	Negative	NO
A0H6	3.71944	Negative	[Not Evaluated]	NO
A0H7	3.4476	Negative	[Not Evaluated]	NO
A0H9	3.82845	Equivocal	Negative	NO
A0HA	3.65881	[Not Available]	Negative	NO
A0HB	3.41094	Equivocal	Negative	NO
A0HF	3.16093	Negative	[Not Evaluated]	NO
A0HI	3.721	Negative	[Not Evaluated]	NO
A0HK	3.36791	Negative	[Not Evaluated]	NO
A0HL	5.16281	Equivocal	Negative	NO
A0HN	4.11012	Equivocal	Negative	NO
A0HO	3.91973	Negative	[Not Evaluated]	NO
A0HP	3.564	Negative	[Not Evaluated]	NO
A0HQ	3.71763	Negative	[Not Evaluated]	NO
A0HU	4.22856	Negative	[Not Evaluated]	NO
A0HW	4.51805	Equivocal	Negative	NO
A0HX	3.56317	Negative	[Not Evaluated]	NO
A0HY	3.42968	Positive	[Not Available]	YES
A0RX	3.64913	Negative	[Not Evaluated]	NO
A0W3	4.40833	Equivocal	Negative	NO
A0W4	4.16875	Negative	[Not Evaluated]	NO
A0W5	4.27796	Equivocal	Equivocal	NO
A0W7	4.07692	Negative	[Not Evaluated]	NO
A0WA	4.5682	Negative	[Not Evaluated]	NO
A18F	4.08856	Negative	[Not Available]	NO
A18G	3.50526	Negative	[Not Available]	NO
A18H	4.17945	Positive	Equivocal	NO
A18I	4.16633	Positive	[Not Available]	NO
A18J	4.02491	Negative	[Not Available]	NO
A18K	3.96559	Negative	[Not Available]	NO
A18L	4.73133	Negative	[Not Available]	NO
A18M	4.01799	Positive	Positive	NO
A18N	4.23475	Negative	[Not Available]	NO
A18P	4.11874	Positive	Positive	NO
A18Q	4.47545	Positive	Negative	NO
A18R	3.96887	Positive	Positive	NO
A18S	3.85224	Negative	[Not Available]	NO
A18T	4.54606	Positive	Negative	NO
A18U	4.13804	Positive	[Not Available]	NO
A18V	4.48187	Negative	[Not Available]	NO
A1EN	3.61125	Positive	[Not Available]	NO
A1EO	4.02356	Negative	[Not Available]	NO
A1ES	4.26966	Negative	[Not Available]	NO
A1ET	3.96047	Negative	[Not Evaluated]	NO
A1EU	4.44668	Negative	[Not Evaluated]	NO
A1EV	3.80128	Positive	[Not Evaluated]	NO
A1EW	4.04395	Negative	[Not Evaluated]	NO
A1EX	3.72848	Positive	Negative	NO
A1EY	4.06744	Negative	[Not Available]	NO
A1F0	4.33949	Negative	[Not Evaluated]	NO
A1F2	3.55261	Positive	[Not Available]	NO
A1F5	4.12238	Negative	[Not Evaluated]	NO
A1F6	4.40418	Negative	[Not Evaluated]	NO
A1F8	4.04215	Positive	[Not Available]	NO
A1FB	4.04811	Negative	[Not Available]	NO
A1FC	5.25174	Negative	[Not Available]	NO
A1FD	4.58476	Negative	[Not Evaluated]	NO
A1FE	4.20249	[Not Evaluated]	[Not Evaluated]	NO
A1FG	3.46775	Negative	[Not Available]	NO
A1FH	4.09745	[Not Evaluated]	[Not Evaluated]	NO
A1FJ	3.99477	[Not Evaluated]	[Not Evaluated]	NO
A1FL	4.41683	[Not Evaluated]	[Not Evaluated]	NO
A1FM	3.95018	[Not Evaluated]	[Not Evaluated]	NO
A1FN	4.76726	[Not Evaluated]	[Not Evaluated]	NO
A1FR	4.95731	[Not Evaluated]	[Not Evaluated]	NO
A1FU	3.79585	[Not Evaluated]	[Not Evaluated]	NO
A201	3.72253	Negative	[Not Evaluated]	NO
A202	3.90879	Positive	[Not Evaluated]	NO
A203	3.65606	[Not Evaluated]	[Not Evaluated]	NO
A204	5.06388	[Not Evaluated]	[Not Evaluated]	NO
A208	3.63228	[Not Evaluated]	[Not Evaluated]	NO
A209	4.41473	[Not Evaluated]	[Not Evaluated]	NO
A28O	4.11667	Negative	[Not Evaluated]	NO
A28Q	4.27889	Negative	Indeterminate	NO
A2L8	4.22564	Negative	Negative	NO
A42T	4.03354	Positive	Equivocal	NO
A42U	3.72939	Negative	[Not Evaluated]	NO
A42V	4.02275	Negative	[Not Evaluated]	NO
A5IZ	4.14785	Negative	Negative	NO
A5J0	3.67808	Negative	[Not Evaluated]	NO
A6R8	3.89868	[Not Evaluated]	Negative	NO
A6R9	4.0368	Negative	[Not Evaluated]	NO
A8FY	4.12331	Negative	[Not Evaluated]	NO
A8FZ	3.98562	Equivocal	[Not Evaluated]	NO
A8G0	4.09328	Negative	[Not Evaluated]	NO
AB28	4.06855	Negative	Indeterminate	NO
A12K	4.30771	[Not Evaluated]	[Not Evaluated]	NO
A12L	3.75189	Equivocal	[Not Evaluated]	NO
A12M	5.07702	Negative	[Not Evaluated]	NO
A12N	3.77249	Negative	[Not Evaluated]	NO
A12O	3.70885	Negative	[Not Evaluated]	NO
A12P	3.79887	Positive	[Not Evaluated]	NO
A12Q	3.81439	Positive	[Not Evaluated]	NO
A12T	3.83686	Positive	[Not Evaluated]	NO
A12U	4.60346	Negative	[Not Evaluated]	NO
A12V	4.37971	Negative	[Not Evaluated]	NO
A12W	3.80942	Negative	[Not Evaluated]	NO
A12X	3.83342	Negative	[Not Evaluated]	NO
A12Y	3.9283	[Not Evaluated]	[Not Evaluated]	NO
A12Z	3.50207	Positive	[Not Evaluated]	NO
A130	4.01933	Equivocal	[Not Evaluated]	NO
A131	3.56189	Negative	[Not Evaluated]	NO
A132	4.21873	[Not Evaluated]	[Not Evaluated]	NO
A133	4.14538	[Not Evaluated]	[Not Evaluated]	NO
A134	4.60433	Equivocal	[Not Evaluated]	NO
A135	3.13282	Positive	[Not Evaluated]	NO
A137	3.29205	Positive	[Not Evaluated]	NO
A138	3.6341	Equivocal	[Not Evaluated]	NO
A1HE	3.94653	Equivocal	[Not Evaluated]	NO
A1HF	4.01927	Positive	[Not Evaluated]	NO
A1HG	4.43646	Negative	[Not Evaluated]	NO
A1HI	3.76931	Negative	[Not Evaluated]	NO
A1HJ	4.90442	Negative	[Not Evaluated]	NO
A1HK	4.03961	Positive	[Not Evaluated]	NO
A1HL	4.08751	Equivocal	[Not Evaluated]	NO
A1HM	4.29295	Negative	[Not Evaluated]	NO
A1HN	4.35952	Equivocal	[Not Evaluated]	NO
A1HO	4.80469	Negative	[Not Evaluated]	NO
A26V	3.56761	Negative	[Not Evaluated]	NO
A26W	3.96582	Equivocal	[Not Evaluated]	NO
A26X	3.65525	Negative	[Not Evaluated]	NO
A26Y	4.18227	Negative	[Not Evaluated]	NO
A26Z	4.16494	Negative	[Not Evaluated]	NO
A273	3.46396	Negative	[Not Evaluated]	NO
A274	3.9589	Negative	[Not Evaluated]	NO
A275	3.54918	[Not Evaluated]	[Not Evaluated]	NO
A278	3.91123	Positive	[Not Evaluated]	NO
A27A	5.17551	Negative	[Not Evaluated]	NO
A27B	4.49507	Negative	[Not Evaluated]	NO
A3M7	3.87411	Negative	[Not Evaluated]	NO
A3M8	4.26879	Positive	[Not Evaluated]	NO
A8HP	3.88839	Positive	[Not Evaluated]	NO
A8HQ	3.9985	Negative	[Not Evaluated]	NO
A8HR	4.04698	[Not Evaluated]	[Not Evaluated]	NO
A13Y	5.62268	Negative	[Not Evaluated]	NO
A13Z	4.31122	Negative	[Not Evaluated]	NO
A140	4.25733	Positive	[Not Evaluated]	NO
A141	4.32502	Negative	[Not Evaluated]	NO
A142	4.28547	Equivocal	Negative	NO
A143	4.76403	Negative	[Not Evaluated]	NO
A145	4.42264	Equivocal	Negative	NO
A146	4.17082	Negative	[Not Evaluated]	NO
A147	4.64073	Negative	[Not Evaluated]	NO
A1J8	4.64759	Negative	[Not Evaluated]	NO
A1J9	3.59189	Positive	[Not Evaluated]	NO
A1JA	4.10405	Positive	[Not Evaluated]	NO
A1JB	4.09774	Equivocal	Positive	NO
A1JC	4.05596	Negative	[Not Evaluated]	NO
A1JD	4.03181	Negative	[Not Evaluated]	NO
A1JE	3.9898	Negative	[Not Evaluated]	NO
A1JF	3.10106	Negative	[Not Evaluated]	NO
A1JH	4.03444	Negative	[Not Evaluated]	NO
A1JI	4.56585	Negative	[Not Evaluated]	NO
A1JJ	4.22636	Negative	[Not Evaluated]	NO
A1JK	3.64162	Negative	[Not Evaluated]	NO
A1JL	4.60929	Negative	[Not Evaluated]	NO
A1JM	4.28171	Negative	[Not Evaluated]	NO
A1JN	3.95547	Indeterminate	Negative	NO
A1JP	4.2253	Negative	[Not Evaluated]	NO
A1JS	3.49497	Negative	[Not Evaluated]	NO
A1JT	4.1402	Equivocal	Negative	NO
A1JU	3.99884	Negative	[Not Evaluated]	NO
A1X5	4.00098	Positive	[Not Evaluated]	NO
A1X6	4.25542	Negative	[Not Evaluated]	NO
A1X7	3.96579	Negative	[Not Evaluated]	NO
A1X8	4.03873	Negative	[Not Evaluated]	NO
A1X9	4.29456	Indeterminate	Negative	NO
A1XA	3.85408	Equivocal	[Not Evaluated]	NO
A1XB	4.03051	Negative	[Not Evaluated]	NO
A1XC	4.72146	Negative	[Not Evaluated]	NO
A1XD	4.80528	Negative	[Not Evaluated]	NO
A1XF	4.79138	Negative	[Not Evaluated]	NO
A1XG	4.52003	Negative	[Not Evaluated]	NO
A1XJ	3.8823	Positive	[Not Evaluated]	NO
A1XK	4.91681	Negative	[Not Evaluated]	NO
A1XL	3.77242	Equivocal	Negative	NO
A1XM	4.31328	Negative	[Not Evaluated]	NO
A1XO	3.85498	Negative	[Not Evaluated]	NO
A1XQ	4.54091	Negative	[Not Evaluated]	NO
A1XR	4.27186	Negative	[Not Evaluated]	NO
A1XS	4.11188	Positive	[Not Evaluated]	NO
A1XT	3.90427	Positive	[Not Evaluated]	NO
A1XU	3.57196	Negative	[Not Evaluated]	NO
A1XV	4.31058	Equivocal	Negative	NO
A1XW	4.24394	Negative	[Not Evaluated]	NO
A1XY	3.59836	Positive	[Not Evaluated]	NO
A1XZ	4.19387	Negative	[Not Evaluated]	NO
A1Y0	4.38645	Negative	[Not Evaluated]	NO
A1Y1	3.97861	Negative	[Not Evaluated]	NO
A1Y2	4.15365	Indeterminate	Negative	NO
A1Y3	3.68548	Indeterminate	Negative	NO
A27E	4.47658	Negative	[Not Evaluated]	NO
A27F	4.4876	Negative	[Not Evaluated]	NO
A27G	4.2181	Equivocal	Negative	NO
A27H	3.81941	Negative	[Not Evaluated]	NO
A27I	4.18229	Negative	[Not Evaluated]	NO
A27K	4.17139	Negative	[Not Evaluated]	NO
A27L	4.18479	Negative	[Not Evaluated]	NO
A27M	4.39123	Negative	[Not Evaluated]	NO
A27N	3.66749	Positive	[Not Evaluated]	NO
A27P	3.99615	Negative	[Not Evaluated]	NO
A27R	3.9138	Equivocal	Negative	NO
A27T	4.21569	Negative	[Not Evaluated]	NO
A27V	4.03504	Negative	[Not Evaluated]	NO
A27W	4.18509	Equivocal	Positive	NO
A3Z5	4.21719	Negative	[Not Evaluated]	NO
A3Z6	3.70621	Negative	[Not Evaluated]	NO
A4Z1	4.06579	Negative	[Not Evaluated]	NO
A73U	4.1665	Negative	Negative	NO
A73W	4.08369	Negative	[Not Evaluated]	NO
A73X	4.03844	Negative	Negative	NO
A105	5.1247	Equivocal	[Not Evaluated]	NO
A106	4.17244	Equivocal	Negative	NO
A107	3.74385	Equivocal	Negative	NO
A108	3.78834	Negative	[Not Evaluated]	NO
A109	4.41647	Equivocal	Negative	NO
A10A	4.69007	Positive	Negative	NO
A10B	4.37754	Equivocal	Negative	NO
A10C	3.69015	Negative	[Not Evaluated]	NO
A10E	3.90478	Equivocal	Negative	NO
A10F	4.26346	Equivocal	Negative	NO
A14N	4.3407	Negative	[Not Evaluated]	NO
A14O	3.24262	Equivocal	Negative	NO
A14P	3.72286	Positive	[Not Evaluated]	YES
A14Q	4.17573	Negative	[Not Evaluated]	NO
A14R	4.36593	Negative	[Not Evaluated]	NO
A14S	4.39362	Equivocal	Negative	NO
A14T	4.72056	Negative	Negative	NO
A14U	3.91403	Equivocal	Negative	NO
A14V	3.62815	Positive	[Not Evaluated]	YES
A14W	4.00942	[Not Evaluated]	Positive	YES
A14X	4.29817	Negative	[Not Evaluated]	NO
A14Y	3.61839	Equivocal	Positive	YES
A14Z	3.90783	Negative	[Not Evaluated]	NO
A150	4.369	Negative	[Not Evaluated]	NO
A152	3.74101	Positive	[Not Evaluated]	YES
A153	3.80467	Negative	[Not Evaluated]	NO
A154	4.19429	Negative	[Not Evaluated]	NO
A155	4.18855	Negative	[Not Evaluated]	NO
A156	4.40495	Negative	[Not Evaluated]	NO
A158	4.74571	Negative	[Not Evaluated]	NO
A159	4.36185	[Not Evaluated]	Negative	NO
A15A	3.95774	Negative	[Not Evaluated]	NO
A15C	4.12322	Equivocal	Negative	NO
A15D	4.15546	Equivocal	Negative	NO
A15E	3.77954	[Not Evaluated]	Positive	YES
A15F	4.32886	Negative	[Not Evaluated]	NO
A15G	4.3368	Negative	[Not Evaluated]	NO
A15H	3.94527	Equivocal	Positive	YES
A15I	4.5441	Equivocal	Negative	NO
A15J	4.05551	Equivocal	Negative	NO
A15K	4.08685	Equivocal	Negative	NO
A15L	4.10536	Equivocal	Negative	NO
A15M	4.34633	Negative	[Not Evaluated]	NO
A15O	4.60377	Equivocal	Negative	NO
A15P	4.14352	Negative	[Not Evaluated]	NO
A15R	5.22483	Equivocal	Negative	NO
A15S	5.10974	Equivocal	Negative	NO
A15T	4.8744	Equivocal	Negative	NO
A1AZ	4.53662	Indeterminate	Negative	NO
A1B0	3.84781	Positive	[Not Evaluated]	YES
A1B1	3.76925	Equivocal	Positive	YES
A1B4	3.7741	Negative	[Not Evaluated]	NO
A1B5	4.11024	Negative	[Not Evaluated]	NO
A1B6	4.25889	Equivocal	Negative	NO
A1BC	3.95355	Negative	[Not Evaluated]	NO
A1BD	3.93665	Equivocal	Negative	NO
A1IE	4.43479	Equivocal	Negative	NO
A1IF	3.81087	Negative	[Not Evaluated]	NO
A1IG	4.20806	Negative	[Not Evaluated]	NO
A1IH	4.11072	Equivocal	[Not Evaluated]	NO
A1II	4.74237	Negative	[Not Evaluated]	NO
A1IJ	3.8233	Equivocal	Negative	NO
A1IK	4.16329	Negative	[Not Evaluated]	NO
A1IL	4.19063	Negative	[Not Evaluated]	NO
A1IN	4.03797	Negative	[Not Evaluated]	NO
A1IO	4.22243	Equivocal	Negative	NO
A1IU	3.92316	Negative	[Not Evaluated]	NO
A1L6	4.04959	Negative	[Not Evaluated]	NO
A1L7	4.68309	Negative	[Not Evaluated]	NO
A1L8	4.04458	Equivocal	Negative	NO
A1L9	4.05118	Negative	[Not Evaluated]	NO
A1LA	3.96218	Equivocal	Negative	NO
A1LB	3.02469	Positive	[Not Evaluated]	YES
A1LE	3.70218	Positive	[Not Evaluated]	YES
A1LG	4.27941	Equivocal	Negative	NO
A1LH	3.98696	Negative	[Not Evaluated]	NO
A1LI	4.46773	Equivocal	Negative	NO
A1LK	3.79903	Equivocal	Negative	NO
A1LL	3.4516	Negative	[Not Evaluated]	NO
A1LS	3.78345	Negative	[Not Evaluated]	NO
A2P5	3.81643	[Not Evaluated]	Negative	NO
A2P6	3.94083	[Not Evaluated]	Negative	NO
A3DX	4.19819	[Not Evaluated]	Positive	YES
A56Z	4.53359	Equivocal	Negative	NO
A570	3.8225	Equivocal	Negative	NO
A572	3.46156	Equivocal	Negative	NO
A573	4.19552	Equivocal	Negative	NO
A574	3.60098	Equivocal	Negative	NO
A576	4.14261	Equivocal	Negative	NO
A9RU	3.76035	Equivocal	Negative	NO
A1N3	4.99975	[Not Evaluated]	[Not Evaluated]	NO
A1N4	4.34057	Positive	[Not Evaluated]	NO
A1N5	4.44803	Positive	[Not Evaluated]	NO
A1N6	3.58298	Positive	[Not Evaluated]	NO
A1N8	4.94974	Negative	[Not Evaluated]	NO
A1N9	4.26073	Positive	[Not Evaluated]	NO
A1NA	3.82949	Positive	[Not Evaluated]	NO
A1NC	3.61236	Positive	[Not Evaluated]	NO
A1ND	4.15273	Positive	[Not Evaluated]	NO
A1NE	4.10638	Negative	[Not Evaluated]	NO
A1NF	3.74566	Negative	[Not Evaluated]	NO
A1NG	3.89285	Negative	[Not Evaluated]	NO
A1NH	4.05374	Negative	[Not Evaluated]	NO
A1NI	3.85342	Negative	[Not Evaluated]	NO
A1QZ	4.01701	[Not Evaluated]	[Not Evaluated]	NO
A1R0	3.9057	[Not Evaluated]	[Not Evaluated]	NO
A1R2	4.26324	Equivocal	Negative	NO
A1R3	3.86222	[Not Evaluated]	[Not Evaluated]	NO
A1R4	4.31865	[Not Evaluated]	[Not Evaluated]	NO
A1R5	4.11325	[Not Evaluated]	[Not Evaluated]	NO
A1R6	4.30819	[Not Evaluated]	[Not Evaluated]	NO
A1R7	3.92781	[Not Evaluated]	[Not Evaluated]	NO
A1RA	4.16954	[Not Evaluated]	[Not Evaluated]	NO
A1RB	4.07848	[Not Evaluated]	[Not Evaluated]	NO
A1RC	4.29562	[Not Evaluated]	[Not Evaluated]	NO
A1RD	4.13011	[Not Evaluated]	[Not Evaluated]	NO
A1RE	4.28503	[Not Evaluated]	[Not Evaluated]	NO
A1RF	4.09733	[Not Evaluated]	[Not Evaluated]	NO
A1RG	3.68213	[Not Evaluated]	[Not Evaluated]	NO
A1RH	3.67825	[Not Evaluated]	[Not Evaluated]	NO
A1RI	4.04505	[Not Evaluated]	[Not Evaluated]	NO
A226	3.99081	[Not Evaluated]	[Not Evaluated]	NO
A227	3.8421	Negative	[Not Evaluated]	NO
A228	4.51533	[Not Evaluated]	[Not Evaluated]	NO
A229	4.11162	[Not Evaluated]	[Not Evaluated]	NO
A22A	3.44208	Negative	[Not Evaluated]	NO
A22B	3.80658	Negative	[Not Evaluated]	NO
A22D	4.37054	Positive	[Not Evaluated]	NO
A22E	3.74398	Positive	[Not Evaluated]	NO
A22G	4.7951	Positive	[Not Evaluated]	NO
A22H	4.42743	Positive	[Not Evaluated]	NO
A243	3.90466	[Not Evaluated]	[Not Evaluated]	NO
A244	4.13155	[Not Evaluated]	[Not Evaluated]	NO
A245	4.69247	[Not Evaluated]	[Not Evaluated]	NO
A247	4.44154	[Not Evaluated]	[Not Evaluated]	NO
A248	4.39683	[Not Evaluated]	[Not Evaluated]	NO
A249	4.07112	[Not Evaluated]	[Not Evaluated]	NO
A24A	4.25921	[Not Evaluated]	[Not Evaluated]	NO
A295	3.80252	Positive	[Not Evaluated]	NO
A2JS	4.51836	[Not Evaluated]	[Not Evaluated]	NO
A2JT	4.72726	[Not Evaluated]	[Not Evaluated]	NO
A3HO	4.56494	[Not Evaluated]	[Not Evaluated]	NO
A3Q9	3.96498	Indeterminate	[Not Evaluated]	NO
A3QA	4.25357	[Not Evaluated]	[Not Evaluated]	NO
A3X8	3.45469	Positive	[Not Evaluated]	NO
A54X	4.44295	Negative	[Not Evaluated]	NO
A54Y	3.79682	Negative	[Not Evaluated]	NO
A5FK	3.63645	Negative	[Not Evaluated]	NO
A5FL	2.70884	Negative	[Not Evaluated]	NO
A5UO	4.52505	[Not Evaluated]	[Not Evaluated]	NO
A5UP	3.95263	[Not Evaluated]	[Not Evaluated]	NO
A6HE	3.8346	Negative	Negative	NO
A1IW	4.21269	Positive	[Not Evaluated]	NO
A1IX	3.99562	Negative	[Not Evaluated]	NO
A1IY	4.22244	Negative	[Not Evaluated]	NO
A1IZ	4.0464	Negative	[Not Evaluated]	NO
A1J1	4.65989	Negative	[Not Evaluated]	NO
A1J2	4.05873	Negative	[Not Evaluated]	NO
A1J3	4.13743	Positive	[Not Evaluated]	YES
A1J5	4.33834	Negative	[Not Evaluated]	YES
A1J6	4.13331	Negative	[Not Evaluated]	NO
A1OV	4.48481	Negative	Negative	NO
A1OW	4.59497	Negative	[Not Evaluated]	NO
A1OX	4.39569	Negative	[Not Evaluated]	NO
A1OY	3.89581	Negative	Negative	NO
A1OZ	3.59731	Equivocal	Positive	YES
A1P0	4.29407	Negative	[Not Evaluated]	NO
A1P1	3.84824	Equivocal	Negative	NO
A1P3	3.87005	Negative	[Not Evaluated]	NO
A1P4	4.27795	Negative	[Not Evaluated]	NO
A1P5	4.05003	Negative	Negative	NO
A1P6	3.92924	Negative	[Not Evaluated]	NO
A1P7	4.18121	Equivocal	Negative	NO
A1P8	4.53351	Negative	[Not Evaluated]	NO
A1PA	4.47996	Negative	[Not Evaluated]	NO
A1PB	3.95038	Negative	[Not Evaluated]	NO
A1PD	4.22043	Equivocal	Positive	YES
A1PE	3.86341	Negative	[Not Evaluated]	NO
A1PF	4.20945	Negative	[Not Evaluated]	NO
A1PG	3.92636	Equivocal	Negative	NO
A1PH	4.15743	Negative	[Not Evaluated]	NO
A2FR	3.70905	Equivocal	Positive	NO
A2FS	3.99569	Negative	[Not Evaluated]	NO
A2FV	3.85321	Negative	[Not Evaluated]	NO
A2FW	4.37762	Negative	[Not Evaluated]	NO
A3U0	4.71836	Negative	[Not Evaluated]	NO
A423	3.98631	Negative	[Not Evaluated]	NO
A424	3.87877	Positive	[Not Evaluated]	NO
A6S9	4.19099	Positive	[Not Evaluated]	NO
A6SA	4.70533	Negative	[Not Evaluated]	NO
A6SB	4.19464	Negative	[Not Evaluated]	NO
A6SC	4.32304	Negative	[Not Evaluated]	NO
A6SD	3.53088	[Not Evaluated]	[Not Evaluated]	NO
A2C8	3.96904	Negative	Negative	NO
A2C9	3.68878	Negative	[Not Evaluated]	NO
A2D9	3.85019	[Not Evaluated]	Negative	NO
A2DA	4.23409	Equivocal	Positive	YES
A2DB	3.82489	Negative	Negative	NO
A2DC	4.48863	[Not Evaluated]	Negative	NO
A2DD	3.59748	Equivocal	Negative	NO
A2DF	3.80397	Negative	Negative	NO
A2DH	4.6841	Negative	Negative	NO
A2DI	4.33978	[Not Evaluated]	Negative	NO
A2DK	3.93588	Negative	[Not Evaluated]	NO
A2DL	4.08839	Negative	[Not Evaluated]	NO
A2DM	4.28306	Negative	[Not Evaluated]	NO
A2DN	3.90467	Negative	[Not Evaluated]	NO
A2DO	4.48584	Negative	[Not Evaluated]	NO
A3NW	4.10637	Equivocal	Negative	NO
A3NY	3.92869	Negative	[Not Evaluated]	NO
A3XG	3.66558	Negative	Negative	NO
A3XL	4.26937	[Not Evaluated]	Negative	NO
A3XN	4.21639	Negative	Negative	NO
A4E0	4.06906	[Not Evaluated]	Negative	NO
A5PV	3.63901	[Not Evaluated]	Negative	NO
A5PX	3.66023	Negative	Negative	NO
A2NL	4.98786	Negative	[Not Evaluated]	NO
A2OB	4.02142	Negative	Negative	NO
A3YW	3.71876	Positive	[Not Evaluated]	NO
A3YX	3.95517	Positive	[Not Evaluated]	NO
A66U	3.83144	Negative	[Not Evaluated]	NO
A74U	4.12655	Negative	[Not Evaluated]	NO
A7W5	4.41982	Negative	[Not Evaluated]	NO
A7W6	4.23613	Negative	[Not Evaluated]	NO
A9QF	3.6582	Positive	[Not Evaluated]	YES
A440	4.22693	Equivocal	Negative	NO
A441	4.55568	Negative	[Not Evaluated]	NO
A442	4.5781	Equivocal	Negative	NO
A50Y	3.68157	Equivocal	Negative	NO
A5YL	2.71173	Positive	Negative	YES
A5YM	3.81892	Equivocal	Positive	NO
A5YN	3.64224	Equivocal	Positive	YES
A5YO	3.89942	Negative	[Not Evaluated]	NO
A5YP	4.38723	Negative	Positive	YES
A6FP	3.79486	Equivocal	Negative	NO
A6FQ	3.51655	Negative	[Not Evaluated]	NO
A6FR	3.83139	Equivocal	Positive	YES
A73Y	4.51795	Negative	[Not Evaluated]	NO
A73Z	3.7077	Equivocal	Negative	NO
A740	3.21555	Equivocal	Negative	NO
A7SZ	3.70206	Negative	[Not Evaluated]	NO
A7T0	4.34586	Positive	[Not Evaluated]	NO
A8F5	3.8893	Negative	[Not Evaluated]	NO
A9Q3	3.35605	Positive	[Not Evaluated]	YES
A4E4	4.44757	[Not Evaluated]	Negative	NO
A51U	3.85689	Negative	Negative	NO
A5Q2	3.8669	Negative	[Not Evaluated]	NO
A5D6	3.18052	[Not Evaluated]	Negative	NO
A5D7	4.9383	[Not Evaluated]	Negative	NO
A5D8	4.59907	[Not Evaluated]	Negative	NO
A5DA	4.36031	[Not Evaluated]	Negative	NO
A5RU	3.8821	[Not Evaluated]	Negative	NO
A5RV	4.08831	[Not Evaluated]	Negative	NO
A5RW	4.20996	[Not Evaluated]	Negative	NO
A5RX	3.96865	[Not Evaluated]	Negative	NO
A5RY	3.30255	[Not Evaluated]	Positive	NO
A5RZ	4.16391	[Not Evaluated]	Positive	NO
A5S0	4.00022	[Not Evaluated]	Positive	YES
A66H	4.15925	[Not Evaluated]	Negative	NO
A66I	4.3378	[Not Evaluated]	Negative	NO
A66J	4.08613	[Not Evaluated]	Negative	NO
A66K	4.09079	Equivocal	Negative	NO
A66L	3.48138	[Not Evaluated]	Negative	NO
A66N	3.3954	[Not Evaluated]	Negative	NO
A66O	3.93265	[Not Evaluated]	Negative	NO
A66P	3.22171	[Not Evaluated]	Negative	NO
A6VO	4.96533	Negative	Negative	NO
A6VQ	4.0281	[Not Evaluated]	Negative	NO
A6VR	3.88221	Negative	Negative	NO
A97C	4.45301	[Not Evaluated]	Negative	NO
A5DC	4.02901	Positive	[Not Evaluated]	NO
A5DD	4.276	Positive	Positive	NO
A5DE	4.22555	Negative	[Not Evaluated]	NO
A8LV	4.27212	[Not Evaluated]	[Not Evaluated]	NO
A8LX	4.81826	[Not Evaluated]	[Not Evaluated]	NO
A8LY	3.72829	[Not Evaluated]	[Not Evaluated]	NO
A8LZ	4.3297	[Not Evaluated]	[Not Evaluated]	NO
A6ZF	4.18626	Equivocal	Negative	YES
A6ZG	4.2914	Negative	[Not Evaluated]	NO
A6ZH	4.01585	Equivocal	Negative	NO
AA0Z	4.77507	Equivocal	Negative	NO
AA10	4.45425	Negative	[Not Evaluated]	NO
AA11	4.18697	Equivocal	Negative	NO
AA12	4.20007	Negative	Negative	NO
AA14	3.75563	Positive	[Not Evaluated]	YES
AA15	4.39034	Negative	[Not Evaluated]	NO
AA17	4.13832	Equivocal	Negative	NO
AAZ6	4.15522	Positive	[Not Evaluated]	YES
A93S	3.53969	Positive	[Not Evaluated]	NO
A7HQ	3.30442	[Not Evaluated]	Negative	NO
A86G	3.80654	Negative	[Not Evaluated]	NO
AB41	3.70517	[Not Evaluated]	[Not Evaluated]	NO
AB44	3.70888	Negative	[Not Evaluated]	NO
A899	4.20598	Negative	[Not Evaluated]	NO
A89A	4.21695	Negative	[Not Evaluated]	NO
A8R5	3.53529	Negative	[Not Evaluated]	NO
A8R6	4.42257	Negative	[Not Evaluated]	NO
