# Supplementary material for: Discovering novel pharmacogenomic biomarkers by imputing drug response in cancer patients from large genomics studies
Source: HighWire-hosted journal article supplement (doi:10.1101/gr.221077.117), 2017-08-28
Supplement: Supplemental_Table_S2.xlsx [file Supplemental_Table_S2.xlsx]

## Sheet: Supp Table 2
Supplementary Table 2: P-values (from t-tests) and effect size for every drug in GDSC when compared between the ERBB2+ and ERBB2- samples in TCGA (as measured by immunohistochemistry). A positive effect size implies a bigger predicted drug response in ERBB2+ tumors. This table can be reproduced in "breast_cancer_analysis.R".
Drug	P-value	Effect Size
Lapatinib	6.76766e-13	0.236804
A.443654	1.07092e-11	0.0902667
Bosutinib	1.08689e-11	-0.0667338
X681640	1.68682e-11	-0.129185
Methotrexate	2.71244e-11	-0.211842
PF.4708671	7.85629e-10	0.130705
AP.24534	1.43359e-09	-0.253676
AZD.2281	1.82979e-09	-0.0312356
Tipifarnib	1.48026e-08	-0.204298
Roscovitine	1.70033e-08	-0.128292
JNK.9L	2.40484e-08	-0.140092
Obatoclax.Mesylate	2.97044e-08	-0.250874
Pyrimethamine	7.38219e-08	-0.120562
WZ.1.84	9.14882e-08	0.272206
ABT.888	1.12015e-07	-0.0425997
Bicalutamide	3.84117e-07	0.0298737
Lenalidomide	6.17572e-07	-0.0358683
MK.2206	7.80573e-07	0.186928
A.770041	9.84311e-07	0.218106
GDC.0449	9.92544e-07	-0.0550611
PLX4720	2.58492e-06	-0.13228
GSK.650394	3.44519e-06	-0.0435844
AUY922	3.73744e-06	-0.138482
JW.7.52.1	3.97137e-06	0.138232
Sorafenib	4.81284e-06	0.0423023
PF.562271	7.25869e-06	-0.132637
BMS.754807	8.913e-06	-0.210638
BAY.61.3606	9.04967e-06	-0.21377
CEP.701	2.10032e-05	-0.0398109
GDC0941	2.19896e-05	0.191606
ABT.263	2.24788e-05	-0.167651
Gefitinib	2.25811e-05	-0.133514
BIBW2992	5.59394e-05	0.112339
Gemcitabine	5.86468e-05	-0.376226
AZ628	6.4674e-05	-0.239334
Nilotinib	8.7142e-05	-0.0516304
AZD.0530	0.000103549	0.196916
Z.LLNle.CHO	0.000142672	0.0956347
AG.014699	0.000158611	-0.119323
OSI.906	0.000179156	-0.166198
WO2009093972	0.000185803	0.105602
Vinorelbine	0.000220421	-0.0513412
Midostaurin	0.000239708	-0.189377
AKT.inhibitor.VIII	0.000254291	0.122194
Epothilone.B	0.00031165	-0.210911
MG.132	0.000501648	0.147122
SB590885	0.000588381	-0.0790748
AS601245	0.000899691	-0.021327
EHT.1864	0.00156907	0.0774314
Bleomycin	0.00157766	-0.278329
Salubrinal	0.00159082	-0.10777
AZD7762	0.00163464	-0.184484
KIN001.135	0.00165563	0.0219294
AZD8055	0.00172076	0.115883
AZD6244	0.00194251	-0.170682
DMOG	0.00310238	-0.0373198
BIRB.0796	0.00349087	-0.00948368
ATRA	0.00480845	-0.0530001
Metformin	0.00577087	0.075579
QS11	0.00623638	-0.0868314
GNF.2	0.00652896	0.0362956
Doxorubicin	0.00665329	-0.0954161
AZD6482	0.00680575	0.122866
VX.702	0.0099088	-0.0411686
XMD8.85	0.0138885	-0.0439342
Etoposide	0.0146336	-0.142059
CI.1040	0.0148386	-0.108774
GW.441756	0.0167933	0.0191922
Temsirolimus	0.0203591	0.108256
NU.7441	0.02112	-0.0402514
KU.55933	0.0211766	-0.0199512
LFM.A13	0.0242609	-0.0289294
Thapsigargin	0.0247417	-0.178057
CCT018159	0.0280642	-0.0566321
CCT007093	0.0371291	-0.0204253
CHIR.99021	0.0405219	-0.0513737
FTI.277	0.0423762	-0.0313706
Erlotinib	0.0441105	-0.0466221
SB.216763	0.0453889	-0.0219498
WH.4.023	0.0565221	0.130288
BI.D1870	0.0586875	-0.0667317
Embelin	0.0681003	-0.0502749
Shikonin	0.0715581	-0.00740451
Elesclomol	0.0875186	-0.0618281
Dasatinib	0.091105	0.184595
Bortezomib	0.0979971	0.0899546
PAC.1	0.0997606	-0.0808422
AMG.706	0.108879	-0.0229596
Axitinib	0.131594	-0.0260621
JNJ.26854165	0.134754	0.0344519
SL.0101.1	0.137862	-0.033
Camptothecin	0.148662	-0.0788674
Sunitinib	0.150146	-0.0166871
IPA.3	0.1931	-0.0340947
TW.37	0.19686	-0.0309352
Cisplatin	0.202632	-0.0518241
CGP.082996	0.203539	0.030127
Bexarotene	0.241683	-0.025691
ZM.447439	0.246832	-0.0367628
JNK.Inhibitor.VIII	0.256632	-0.0114142
Bryostatin.1	0.258204	-0.013997
Vinblastine	0.280469	0.0513835
Imatinib	0.284212	0.00131909
PF.02341066	0.302173	0.0218827
Cytarabine	0.305588	-0.04867
GW843682X	0.345529	0.0153514
VX.680	0.356401	0.0337442
AICAR	0.371886	-0.0310539
NSC.87877	0.385758	0.00850235
BMS.708163	0.386033	0.00774233
PD.173074	0.391528	-0.0150351
NVP.TAE684	0.396141	0.0109763
X17.AAG	0.401069	0.0450311
BMS.509744	0.413836	0.0156252
Mitomycin.C	0.41471	-0.0302154
CGP.60474	0.478247	-0.0161585
RO.3306	0.479884	-0.0144367
PHA.665752	0.494612	0.00543322
Paclitaxel	0.528098	0.0260844
FH535	0.559869	0.0134691
PD.0325901	0.560829	-0.033608
PD.0332991	0.562741	-0.0399379
Nutlin.3a	0.568365	0.0300532
S.Trityl.L.cysteine	0.604063	0.0153668
BX.795	0.618704	-0.0303434
Vorinostat	0.671462	0.00993921
Parthenolide	0.699209	0.00437616
Docetaxel	0.734022	0.0123225
BMS.536924	0.753816	0.0208533
MS.275	0.774875	0.00546746
NVP.BEZ235	0.829778	0.00673176
Cyclopamine	0.868105	0.00100699
GSK269962A	0.872588	0.00254852
Pazopanib	0.910586	-0.00074989
BI.2536	0.936444	0.00170092
Rapamycin	0.939491	-0.00167637
CMK	0.944124	-0.00174996
RDEA119	0.995962	5.29531e-05
