# Supplementary material for: Discovering novel pharmacogenomic biomarkers by imputing drug response in cancer patients from large genomics studies
Source: HighWire-hosted journal article supplement (doi:10.1101/gr.221077.117), 2017-08-28
Supplement: Supplemental_Table_S3.xlsx [file Supplemental_Table_S3.xlsx]

## Sheet: Supp Tab 3
Supplementary Table 3: Top 40 associations between CNA and predicted lapatinib response in the TCGA breast cancer samples. All top associations are in the ERBB2 amplicon. The known causative gene is ERBB2
Gene	P-value	Effect Sizes	FDR	Number of Amplified Samples	Number of Not Amplified Samples
PNMT	2.13172e-13	-0.185501	2.26437e-10	112	949
TCAP	2.13172e-13	-0.185501	2.26437e-10	112	949
PGAP3	2.44708e-13	-0.184978	2.26437e-10	112	947
MIEN1	5.18845e-13	-0.180612	3.60078e-10	111	950
MIR4728	6.96699e-13	-0.178552	3.65356e-10	112	950
GRB7	7.89674e-13	-0.180698	3.65356e-10	108	948
PPP1R1B	1.83318e-12	-0.184475	7.26986e-10	106	951
STARD3	2.45093e-12	-0.18007	8.50473e-10	107	947
NEUROD2	8.47765e-12	-0.180411	2.61489e-09	102	958
ERBB2	4.29329e-11	-0.190166	1.19182e-08	86	945
ZPBP2	2.18475e-10	-0.174846	5.51353e-08	94	962
GSDMB	8.08339e-10	-0.170398	1.87e-07	91	967
ORMDL3	9.25542e-10	-0.172875	1.97639e-07	90	968
IKZF3	1e-09	-0.178977	2.07258e-07	82	943
LRRC3C	3.55677e-09	-0.170921	6.39057e-07	86	974
GSDMA	3.68333e-09	-0.173567	6.39057e-07	83	974
PSMD3	1.48788e-08	-0.17597	2.42962e-06	77	978
CSF3	2.35026e-08	-0.168833	3.62463e-06	79	981
SNORD124	7.64231e-08	-0.165625	1.11658e-05	77	985
CDK12	4.85e-07	-0.142551	6.73111e-05	76	955
THRA	5.11741e-07	-0.170825	6.76473e-05	64	986
MED24	1.3536e-06	-0.169329	0.000170799	62	972
NR1D1	2.68717e-06	-0.163968	0.00032433	65	993
NXPH3	6.64012e-06	-0.187295	0.00076804	44	1014
MED1	8.17842e-06	-0.128694	0.000908132	72	974
RAPGEFL1	9.8727e-06	-0.156611	0.00103417	54	1000
FLJ40194	1.03201e-05	-0.173065	0.00103417	48	1013
NGFR	1.04311e-05	-0.187064	0.00103417	43	1012
PHOSPHO1	1.44751e-05	-0.173533	0.00135018	47	1013
EPN3	1.45913e-05	-0.179969	0.00135018	42	1018
CASC3	1.58277e-05	-0.151106	0.00141734	57	999
ABI3	1.89744e-05	-0.174671	0.0016051	46	1011
MSL1	1.90808e-05	-0.144338	0.0016051	60	997
GNGT2	2.02487e-05	-0.173951	0.00165325	46	1015
WIPF2	2.67239e-05	-0.152588	0.00211958	42	1008
HELZ	2.79726e-05	-0.168895	0.002157	34	1009
SLC35B1	3.01803e-05	-0.178713	0.0022595	41	1017
ACSF2	3.1142e-05	-0.177798	0.0022595	44	1010
PHB	3.17437e-05	-0.165361	0.0022595	47	1007
ANKRD40	3.27186e-05	-0.165401	0.00227067	43	1015
