# Supplementary material for: Discovering novel pharmacogenomic biomarkers by imputing drug response in cancer patients from large genomics studies
Source: HighWire-hosted journal article supplement (doi:10.1101/gr.221077.117), 2017-08-28
Supplement: Supplemental_Table_S4.xlsx [file Supplemental_Table_S4.xlsx]

## Sheet: Supp Tab 4
Supplementary Table 4: P-values achieved for association of CNA and lapatinib response when we condition on ERBB2 amplification. EGFR, the known secondary target of lapatinib, is identified as the most strongly associated gene in this analysis.
Gene	P-value
EGFR-AS1	0.000323163
ABCA9	0.000532818
ABCA6	0.000534189
RAD52	0.000913425
ABCA8	0.00144665
PRB3	0.00155456
PRB1	0.00155703
PRB2	0.00155703
POP4	0.00228747
LINC01252	0.00291879
LOC284395	0.00348287
ARNTL2	0.00389451
C12orf71	0.00392969
MED21	0.00393967
MIR4524A	0.00402432
MIR4524B	0.00402432
ABCA10	0.00404748
MYO18A	0.00406003
ETNK1	0.00422256
