# Supplementary material for: Discovering novel pharmacogenomic biomarkers by imputing drug response in cancer patients from large genomics studies
Source: HighWire-hosted journal article supplement (doi:10.1101/gr.221077.117), 2017-08-28
Supplement: Supplemental_Table_S5.xlsx [file Supplemental_Table_S5.xlsx]

## Sheet: Supp Tab 5
Supplementary Table 5: Top associations between copy number amplification and drug sensitivity across all TCGA breast cancer samples.
Drug	Genes	Chromosome	Chromosome Location	P-Values	Effect Size	Number of Amplified Samples	Number of Not Amplified Samples
Obatoclax.Mesylate	PGAP3	17	-37827375	3.0386e-29	0.339738	112	947
Vinorelbine	LOC728024	8	-37604074	4.4364e-20	0.384824	111	948
CEP.701	MIEN1	17	-37885409	5.95265e-20	0.362866	111	950
Tipifarnib	LOC728024	8	-37604074	3.86769e-18	0.307068	111	948
CGP.082996	CSMD3	8	-113235159	1.61206e-17	-0.274392	75	936
AMG.706	PROSC	8	37620101	3.15705e-17	-0.0808817	112	948
Epothilone.B	MIR4728	17	37882748	6.24072e-17	0.102638	112	950
KU.55933	PGAP3	17	-37827375	3.11655e-16	0.181441	112	947
PLX4720	ORMDL3	17	-38077296	4.33457e-16	0.232973	90	968
Z.LLNle.CHO	ERLIN2	8	37594097	4.46595e-16	0.15351	110	940
Gemcitabine	LOC728024	8	-37604074	6.61306e-16	0.702316	111	948
PF.562271	LOC728024	8	-37604074	1.11193e-15	0.212729	111	948
GW.441756	ORAOV1	11	-69480332	1.61968e-15	-0.0386953	136	918
BAY.61.3606	CCND1	11	69455873	1.80183e-15	0.268272	136	920
EHT.1864	MIR378D2	8	-94928250	2.16759e-15	-0.17142	74	988
Shikonin	PROSC	8	37620101	2.18309e-15	0.18448	112	948
Cyclopamine	PROSC	8	37620101	2.88276e-15	0.0878181	112	948
MK.2206	PGAP3	17	-37827375	3.19126e-15	-0.0588137	112	947
A.443654	STARD3	17	37793333	4.36515e-15	-0.081328	107	947
Cytarabine	MIEN1	17	-37885409	4.43324e-15	0.0878654	111	950
BIRB.0796	SLC26A7	8	92261516	1.6775e-14	-0.0440109	64	981
AZ628	MIR4728	17	37882748	1.70629e-14	0.302686	112	950
MG.132	OXR1	8	107670036	1.72229e-14	0.250049	74	964
PD.173074	EBAG9	8	110552310	2.09167e-14	-0.195621	79	983
X681640	MIEN1	17	-37885409	3.34006e-14	0.282885	111	950
BI.D1870	MIR4737	17	-58120386	3.50182e-14	0.258381	62	998
Embelin	LOC728024	8	-37604074	5.36102e-14	0.191351	111	948
WZ.1.84	PNMT	17	37824507	5.52342e-14	-0.197216	112	949
GSK.650394	SUMO1P1	20	-52491040	6.66851e-14	0.262413	57	1005
PF.4708671	SLC26A7	8	92261516	1.424e-13	-0.0865219	64	981
Lapatinib	PNMT	17	37824507	2.80604e-13	-0.168905	112	949
AS601245	STARD3	17	37793333	3.35238e-13	0.191757	107	947
AZD6482	PGAP3	17	-37827375	5.94721e-13	-0.272081	112	947
JNK.9L	ERLIN2	8	37594097	6.99743e-13	0.0499662	110	940
Pyrimethamine	PNMT	17	37824507	9.33041e-13	0.124901	112	949
AZD7762	MIEN1	17	-37885409	1.23051e-12	0.270254	111	950
AUY922	ADGRA2	NA	NA	1.32178e-12	0.247175	106	938
Etoposide	ERLIN2	8	37594097	1.35311e-12	0.103086	110	940
Doxorubicin	ERLIN2	8	37594097	1.57749e-12	0.321488	110	940
Bortezomib	POU5F1B	8	128427857	1.83816e-12	0.347853	107	954
Bexarotene	ZFPM2	8	106331147	4.82794e-12	0.140924	72	964
NU.7441	LOC653653	17	-58179121	4.93166e-12	0.119142	61	1001
JNK.Inhibitor.VIII	RAD54B	8	-95384188	9.88055e-12	-0.0903182	74	985
CI.1040	IKZF3	17	-37913968	1.78056e-11	0.0900983	82	943
Elesclomol	STK3	8	-99466859	1.88402e-11	-0.318463	66	967
Roscovitine	GDPD4	11	-76927603	2.60622e-11	0.0291378	51	999
NSC.87877	PROSC	8	37620101	3.13726e-11	0.0630034	112	948
RDEA119	TRPS1	8	-116420724	3.51434e-11	0.364552	95	936
GDC0941	STK3	8	-99466859	5.73197e-11	-0.308776	66	967
MS.275	SAMD12	8	-119390227	6.48174e-11	-0.175563	79	955
Mitomycin.C	PCK1	20	56136137	6.5275e-11	0.364863	37	1022
RO.3306	PNMT	17	37824507	6.975e-11	0.100195	112	949
CHIR.99021	CDH17	8	-95139394	9.43368e-11	0.152171	74	981
GDC.0449	MIEN1	17	-37885409	1.07006e-10	0.0765365	111	950
Nutlin.3a	MIR21	17	57918627	1.07097e-10	-0.281779	62	996
BX.795	APPBP2	17	-58520520	1.60298e-10	0.432129	57	993
AG.014699	STARD3	17	37793333	1.76108e-10	0.174346	107	947
AICAR	PGAP3	17	-37827375	2.03779e-10	0.205314	112	947
Salubrinal	MIR661	8	-145019359	2.35392e-10	-0.0934969	63	996
Vinblastine	MCM4	8	48872763	2.52241e-10	0.415621	41	1021
SB.216763	FAM91A1	8	124780882	2.54444e-10	0.171287	83	976
Bosutinib	ERBB2	17	37856254	2.57603e-10	0.0652175	86	945
AP.24534	STARD3	17	37793333	3.65854e-10	0.25272	107	947
Thapsigargin	SUMO1P1	20	-52491040	4.62615e-10	0.574768	57	1005
Sorafenib	RNFT1	17	-58029723	5.23571e-10	-0.0658772	62	998
AKT.inhibitor.VIII	LOC728024	8	-37604074	7.78971e-10	0.197923	111	948
QS11	ZNF217	20	-52183610	8.2928e-10	0.16825	56	1002
AZD.2281	SHANK2-AS1	11	70477199	1.21276e-09	0.173925	90	971
TW.37	MIEN1	17	-37885409	1.4889e-09	0.138622	111	950
CCT018159	ZNF703	8	37553301	1.63992e-09	0.148346	113	948
Docetaxel	PGAP3	17	-37827375	1.90595e-09	0.176767	112	947
Bleomycin	PCK1	20	56136137	2.10557e-09	0.768406	37	1022
CCT007093	CHAD	17	-48541853	3.7084e-09	-0.0229792	45	1014
BMS.708163	LOC728024	8	-37604074	4.13862e-09	-0.0331419	111	948
ZM.447439	MYEOV	11	69061622	4.29397e-09	0.205862	110	928
NVP.BEZ235	MIR4737	17	-58120386	5e-09	0.162442	62	998
PD.0332991	MIEN1	17	-37885409	5.0787e-09	0.282324	111	950
VX.702	PPM1D	17	58677544	6.24391e-09	-0.101688	54	991
CMK	CSMD3	8	-113235159	6.49867e-09	-0.0676612	75	936
AZD6244	GSDMB	17	-38060848	7.12993e-09	0.218215	91	967
Cisplatin	EIF4EBP1	8	37888020	7.92385e-09	0.168254	107	947
Axitinib	MIEN1	17	-37885409	1.15147e-08	0.108967	111	950
JW.7.52.1	STARD3	17	37793333	1.25064e-08	-0.0673263	107	947
Methotrexate	ERBB2	17	37856254	1.37642e-08	0.170751	86	945
BIBW2992	ACER3	11	76571917	1.51698e-08	-0.204127	42	995
GNF.2	C17orf64	17	58499865	5.31381e-08	0.0666312	63	997
Gefitinib	ORMDL3	17	-38077296	5.66653e-08	0.158825	90	968
Midostaurin	MIEN1	17	-37885409	5.87299e-08	0.207451	111	950
XMD8.85	ADRB3	8	-37820514	6.3e-08	0.0971188	107	955
Parthenolide	KAT6A	8	-41786997	6.31024e-08	0.0400106	64	977
CGP.60474	EIF4EBP1	8	37888020	6.74479e-08	0.0924012	107	947
Camptothecin	NTSR1	20	61340189	2.86e-07	0.541232	25	1024
BMS.754807	ZNF217	20	-52183610	3.81868e-07	0.387446	56	1002
DMOG	FGF4	11	-69587797	3.89641e-07	0.21615	130	929
IPA.3	ERLIN2	8	37594097	4.4078e-07	0.110669	110	940
SL.0101.1	GRHL2	8	102504668	4.91092e-07	-0.10404	78	963
AZD8055	STK3	8	-99466859	5.32692e-07	-0.132838	66	967
A.770041	PPP1R1B	17	37783177	6.31474e-07	-0.160275	106	951
SB590885	ERBB2	17	37856254	7.22e-07	0.114941	86	945
Erlotinib	MIEN1	17	-37885409	7.84688e-07	0.0852141	111	950
AZD.0530	SEZ6	17	-27281947	8.06e-07	-0.296609	25	1029
S.Trityl.L.cysteine	FBXO32	8	-124510127	8.11695e-07	-0.093896	82	978
Lenalidomide	ZFAT-AS1	8	135610314	9.75652e-07	-0.0542133	77	983
BMS.536924	GDPD4	11	-76927603	1.56644e-06	0.288096	51	999
PAC.1	ERLIN2	8	37594097	1.80031e-06	0.136266	110	940
FTI.277	TRPS1	8	-116420724	1.93777e-06	0.0733496	95	936
WO2009093972	SMIM10L1	NA	NA	2.34375e-06	0.460184	10	1045
Temsirolimus	MIR378D2	8	-94928250	2.74821e-06	-0.228733	74	988
OSI.906	LINC01252	NA	NA	3.51294e-06	-0.559164	11	1049
FH535	LOC728024	8	-37604074	4.99683e-06	0.084747	111	948
ABT.263	MIR3662	6	-135300476	5.46674e-06	-0.730406	10	1052
Bryostatin.1	TRPS1	8	-116420724	6.63016e-06	0.064399	95	936
Paclitaxel	EIF4EBP1	8	37888020	7.56467e-06	0.162572	107	947
PD.0325901	WDYHV1	8	124428965	1.33431e-05	0.192418	81	979
Bicalutamide	ACSF2	17	48503519	1.3389e-05	-0.0489	44	1010
Nilotinib	RDH10	8	74206837	1.61729e-05	-0.0797715	50	1011
Rapamycin	ERP27	12	-15066976	1.84979e-05	0.26862	9	1050
BMS.509744	CLNS1A	11	-77327196	2.14916e-05	0.0796786	54	993
Vorinostat	SMIM10L1	NA	NA	2.34659e-05	-0.363488	10	1045
VX.680	SMIM10L1	NA	NA	2.35749e-05	-0.503084	10	1045
ATRA	FLJ46284	8	-93725190	2.73836e-05	-0.194756	70	986
X17.AAG	TAS2R50	12	-11138512	3.64515e-05	0.881173	9	1052
Sunitinib	GDPD4	11	-76927603	4.73501e-05	0.227977	51	999
Imatinib	ZNF274	19	58694396	4.97391e-05	-0.0584815	9	1048
LFM.A13	ACER3	11	76571917	6.1344e-05	0.0595861	42	995
Metformin	SPAG4	20	34203809	0.000101734	0.173713	15	1047
Dasatinib	APPBP2	17	-58520520	0.000188716	0.31243	57	993
WH.4.023	C1orf111	1	-162343515	0.000190494	0.382539	21	1040
KIN001.135	NEUROD2	17	-37760021	0.000214751	-0.0214121	102	958
Pazopanib	ZNF420	19	37569382	0.00039859	0.257508	11	1046
ABT.888	KDM2A	11	66886740	0.000426883	0.106376	23	995
JNJ.26854165	STK3	8	-99466859	0.00051706	-0.0527207	66	967
GW843682X	PROSC	8	37620101	0.000525778	0.0259683	112	948
GSK269962A	MIR101-2	9	4850297	0.000544603	0.588396	6	1056
PHA.665752	PTK7	6	43044006	0.000616805	-0.0936151	9	1048
PF.02341066	ETV6	12	11802788	0.000631384	0.321672	6	1008
BI.2536	WHSC1L1	8	-38132561	0.000740666	0.0351875	89	940
NVP.TAE684	PRR4	12	-10998448	0.00176009	0.148301	9	1053
