# Supplementary material for: Discovering novel pharmacogenomic biomarkers by imputing drug response in cancer patients from large genomics studies
Source: HighWire-hosted journal article supplement (doi:10.1101/gr.221077.117), 2017-08-28
Supplement: Supplemental_Table_S6.xlsx [file Supplemental_Table_S6.xlsx]

## Sheet: Supp Tab 6
Supplementary Table 6: The results of 10 fold cross-validation for all drug on the GDSC cell lines. We have included correlations on only solid tumors and only blood cancers, because in some cases the high correlation for all tumors could be driven by a large difference between these two very different classes of cancers. Notably, correlations are generally poor for blood cancer cell lines, altho…
Drug	N All	Spearman Correlation All	Spearman P-value All	N Solid Tumors	Spearman Correlation Solid	Spearman P-value Solid	N Blood	Spearman Correlation Blood	Spearman P-value Blood
A.443654	285	0.0844421	0.155078	202	0.130167	0.0648335	83	-0.0782309	0.482064
A.770041	286	0.283999	1.04631e-06	203	0.374593	3.67144e-08	83	0.0480863	0.665965
ABT.263	480	0.561167	0	439	0.475812	0	41	0.418236	0.00650495
ABT.888	495	0.362872	0	451	0.171774	0.000247269	44	0.0511468	0.741613
AG.014699	422	0.357991	3.33067e-14	421	0.358496	3.26406e-14	NA	NA	NA
AICAR	490	0.401253	0	448	0.333606	4.16556e-13	42	0.114761	0.469259
AKT.inhibitor.VIII	559	0.296419	8.42881e-13	477	0.315449	1.75993e-12	82	0.0125567	0.910851
AMG.706	480	0.184134	4.94096e-05	439	0.193297	4.56236e-05	41	-0.222854	0.161358
AP.24534	559	0.166015	8.02191e-05	477	0.255838	1.44882e-08	82	-0.0878831	0.432384
AS601245	554	0.243087	6.79879e-09	473	0.267651	3.34171e-09	81	0.0503084	0.655582
ATRA	495	0.477787	0	452	0.352416	1.15463e-14	43	-0.0204743	0.896316
AUY922	554	0.268026	1.43601e-10	473	0.289894	1.30482e-10	81	0.0820782	0.466337
Axitinib	497	0.319769	2.80664e-13	453	0.281009	1.14678e-09	44	0.272513	0.07351
AZ628	282	0.452898	1.11022e-15	200	0.531735	4.44089e-16	82	0.122652	0.272309
AZD.0530	288	0.405381	8.10685e-13	205	0.454268	7.84062e-12	83	0.170416	0.123485
AZD.2281	479	0.471536	0	435	0.4258	0	44	-0.14265	0.355628
AZD6244	454	0.416199	0	413	0.420179	0	41	0.30444	0.052954
AZD6482	559	0.346407	0	477	0.386022	0	82	0.155995	0.161665
AZD7762	495	0.324161	1.42109e-13	451	0.320815	2.96252e-12	44	-0.232971	0.128035
AZD8055	474	0.201783	9.54845e-06	433	0.174812	0.00025692	41	-0.0218257	0.892259
BAY.61.3606	554	0.394092	0	473	0.335532	6.57252e-14	81	0.0536348	0.634393
Bexarotene	554	0.246975	3.82731e-09	473	0.267675	3.33068e-09	81	-0.019235	0.864664
BI.2536	286	0.101739	0.0858915	203	0.0862368	0.221187	83	0.113223	0.308134
BIBW2992	497	0.440987	0	453	0.461784	0	44	0.19373	0.207654
Bicalutamide	554	0.31918	1.37668e-14	473	0.205875	6.35908e-06	81	-0.110076	0.327944
BI.D1870	493	0.343207	4.44089e-15	452	0.344679	4.70735e-14	41	-0.0482856	0.764336
BIRB.0796	493	0.0128591	0.775794	452	0.0217693	0.644372	41	-0.174098	0.276315
Bleomycin	554	0.32998	1.55431e-15	473	0.331196	1.42775e-13	81	0.323549	0.00321527
BMS.509744	286	0.0654255	0.270122	203	0.0999332	0.156019	83	-0.109912	0.322583
BMS.536924	286	0.346124	1.80131e-09	203	0.376204	3.17443e-08	83	0.200671	0.0689077
BMS.708163	423	0.0217685	0.655279	422	0.0243635	0.617723	NA	NA	NA
BMS.754807	554	0.381628	0	473	0.333098	1.01696e-13	81	0.20513	0.0662006
Bortezomib	282	0.443155	5.32907e-15	200	0.500719	4.32987e-14	82	0.100858	0.367273
Bosutinib	495	0.397487	0	451	0.348789	2.39808e-14	44	0.0350188	0.821458
Bryostatin.1	554	0.232451	3.11418e-08	473	0.177689	0.000102235	81	-0.0184336	0.870253
BX.795	464	0.48986	0	429	0.490806	0	35	0.223767	0.196287
Camptothecin	497	0.445633	0	453	0.429462	0	44	0.121946	0.430367
CCT007093	423	0.0285448	0.558237	422	0.0273194	0.575717	NA	NA	NA
CCT018159	414	0.292696	1.27175e-09	413	0.290748	1.72972e-09	NA	NA	NA
CEP.701	497	0.341579	4.88498e-15	453	0.341818	7.32747e-14	44	-0.131229	0.395828
CGP.082996	285	0.302617	1.89908e-07	202	0.247027	0.000393777	83	0.366575	0.000653271
CGP.60474	285	0.219271	0.000190753	202	0.23506	0.000758776	83	0.172948	0.117925
CHIR.99021	559	0.339037	2.22045e-16	477	0.359155	4.44089e-16	82	0.12299	0.270981
CI.1040	494	0.421521	0	450	0.424539	0	44	0.34004	0.0239209
Cisplatin	497	0.317891	3.92353e-13	453	0.354256	7.54952e-15	44	-0.278373	0.0672928
CMK	285	0.155544	0.00852921	202	0.263852	0.000148106	83	-0.160697	0.146705
Cyclopamine	282	0.141629	0.017322	200	0.0747329	0.292923	82	-0.0050697	0.963945
Cytarabine	497	0.34212	4.44089e-15	453	0.33636	1.91402e-13	44	0.319146	0.034721
Dasatinib	285	0.512255	0	202	0.678949	0	83	0.155401	0.160664
DMOG	559	0.375683	0	477	0.309168	5.03864e-12	82	0.148941	0.18172
Docetaxel	488	0.353631	8.88178e-16	444	0.353221	1.70974e-14	44	-0.0841431	0.587103
Doxorubicin	554	0.233987	2.51111e-08	473	0.23234	3.22552e-07	81	0.244772	0.0276425
EHT.1864	423	0.260825	5.23915e-08	422	0.26077	5.46951e-08	NA	NA	NA
Elesclomol	497	0.397928	0	453	0.398504	0	44	0.0240486	0.876861
Embelin	554	0.298096	7.83373e-13	473	0.324344	4.7673e-13	81	0.083171	0.460402
Epothilone.B	554	0.292555	2.14628e-12	473	0.310625	4.86633e-12	81	-0.0221967	0.84407
Erlotinib	260	0.368689	8.58484e-10	184	0.379743	1.05791e-07	76	-0.0876737	0.451386
Etoposide	559	0.285591	5.94436e-12	477	0.283706	2.78858e-10	82	0.250854	0.0230152
FH535	554	0.322063	7.77156e-15	473	0.322504	6.55476e-13	81	0.00153201	0.98917
FTI.277	559	0.343548	0	477	0.354059	1.55431e-15	82	-0.0431509	0.700291
GDC.0449	491	0.102248	0.023462	449	0.0576224	0.222993	42	-0.265944	0.0886976
GDC0941	458	0.29421	1.34632e-10	423	0.281717	3.70672e-09	35	0.267718	0.11998
Gefitinib	497	0.428784	0	453	0.405315	0	44	-0.0442216	0.775623
Gemcitabine	554	0.311612	6.12843e-14	473	0.323597	5.42677e-13	81	0.146733	0.191159
GNF.2	285	0.194224	0.000981041	202	0.174229	0.0131424	83	0.176468	0.110519
GSK269962A	285	0.257617	1.0601e-05	203	0.244914	0.000428754	82	0.28798	0.00870153
GSK.650394	554	0.19841	2.52196e-06	473	0.216481	2.01258e-06	81	0.0731077	0.51659
GW.441756	497	0.078027	0.0822524	453	0.0631611	0.179618	44	-0.0768919	0.619827
GW843682X	286	0.110477	0.0620597	203	0.102321	0.146316	83	0.122271	0.270815
Imatinib	288	0.0216099	0.714978	205	-0.0870232	0.21471	83	0.155593	0.160142
IPA.3	554	0.378197	0	473	0.244802	6.95784e-08	81	0.184104	0.0999117
JNJ.26854165	422	0.249009	2.19543e-07	421	0.248147	2.50549e-07	NA	NA	NA
JNK.9L	559	0.210145	5.34589e-07	477	0.211141	3.28988e-06	82	-0.061495	0.583121
JNK.Inhibitor.VIII	493	0.0396234	0.380001	452	0.0328674	0.485788	41	-0.290623	0.0652765
JW.7.52.1	286	0.178939	0.00238599	203	0.22446	0.00128415	83	0.0338838	0.76105
KIN001.135	286	0.204221	0.000510356	204	-0.0461607	0.512079	82	0.0488833	0.662748
KU.55933	477	0.175526	0.000116465	442	0.176372	0.000193962	35	-0.303939	0.0758833
Lapatinib	279	0.487886	0	197	0.462468	7.8324e-12	82	-0.0830367	0.458289
Lenalidomide	497	0.24	6.0835e-08	453	0.102205	0.0296304	44	-0.225294	0.141457
LFM.A13	554	0.175568	3.24774e-05	473	0.148084	0.00123825	81	-0.102648	0.361829
Metformin	496	0.296271	1.65763e-11	452	0.281451	1.12403e-09	44	-0.172195	0.263693
Methotrexate	473	0.614067	0	431	0.413758	0	42	-0.0502007	0.752216
MG.132	285	0.406003	9.77884e-13	203	0.466481	2.3066e-12	82	-0.0133935	0.904937
Midostaurin	559	0.395332	0	477	0.419899	0	82	0.165176	0.138081
Mitomycin.C	554	0.386922	0	473	0.34284	1.73195e-14	81	0.477945	6.41376e-06
MK.2206	454	0.178067	0.000136626	413	0.167847	0.000614697	41	-0.0858854	0.5934
MS.275	282	0.0917353	0.124318	200	0.0203956	0.774373	82	0.168709	0.129734
Nilotinib	497	0.339621	7.10543e-15	453	0.145265	0.00193708	44	0.242007	0.113488
NSC.87877	559	0.112901	0.00754231	477	0.0574582	0.210334	82	-0.102472	0.359617
NU.7441	477	0.169058	0.000207818	442	0.178893	0.000156255	35	-0.490993	0.00274543
Nutlin.3a	480	0.545396	0	439	0.522819	0	41	0.508137	0.00069452
NVP.BEZ235	473	0.325253	4.07008e-13	432	0.339272	4.25437e-13	41	-0.0330983	0.837232
NVP.TAE684	288	0.31844	3.293e-08	205	0.206907	0.0029144	83	0.470905	7.02964e-06
Obatoclax.Mesylate	554	0.332954	8.88178e-16	473	0.337861	4.30767e-14	81	0.209938	0.0599592
OSI.906	554	0.291157	2.75779e-12	473	0.266725	3.80094e-09	81	0.274059	0.0132942
PAC.1	554	0.371288	0	473	0.274117	1.3412e-09	81	0.176765	0.114424
Paclitaxel	286	0.255352	1.23011e-05	203	0.274524	7.38164e-05	83	0.189781	0.0857207
Parthenolide	285	0.174184	0.00317548	203	0.158811	0.0236287	82	0.213551	0.0540566
Pazopanib	554	0.264592	2.50318e-10	473	0.278221	7.41949e-10	81	0.0779496	0.489128
PD.0325901	474	0.566365	0	433	0.559048	0	41	0.543229	0.000242469
PD.0332991	454	0.430943	0	413	0.426751	0	41	0.0735703	0.647576
PD.173074	480	0.352442	1.77636e-15	439	0.284152	1.34377e-09	41	0.111959	0.485859
PF.02341066	288	0.293914	3.79792e-07	205	0.0645245	0.358013	83	0.443889	2.63037e-05
PF.4708671	422	0.190977	7.88282e-05	421	0.191548	7.64607e-05	NA	NA	NA
PF.562271	559	0.228957	4.39925e-08	477	0.237837	1.46882e-07	82	0.161613	0.146905
PHA.665752	288	0.140957	0.0166806	205	0.0336178	0.632276	83	0.12648	0.25454
PLX4720	492	0.383923	0	451	0.372759	2.22045e-16	41	0.199689	0.210663
Pyrimethamine	285	0.259116	9.37652e-06	203	0.200676	0.00409436	82	0.138417	0.214917
QS11	554	0.201429	1.75781e-06	473	0.211759	3.38351e-06	81	0.0323168	0.774568
Rapamycin	288	0.198756	0.000693226	205	0.158673	0.0230637	83	0.241138	0.0280867
RDEA119	474	0.579135	0	433	0.579377	0	41	0.462379	0.00233722
RO.3306	480	0.233296	2.348e-07	439	0.23791	4.57941e-07	41	0.165721	0.300435
Roscovitine	279	-0.239807	5.19262e-05	197	-0.110774	0.121223	82	-0.451401	2.07713e-05
Salubrinal	283	0.239511	4.68582e-05	201	0.223582	0.00142007	82	0.110137	0.324612
SB.216763	486	0.162687	0.000316643	444	0.13141	0.00555058	42	-0.025227	0.873999
SB590885	463	0.405376	0	422	0.387645	0	41	-0.0345916	0.829995
Shikonin	559	0.278039	2.21068e-11	477	0.267397	2.97286e-09	82	0.209083	0.0594086
SL.0101.1	489	0.276936	4.64687e-10	448	0.188387	6.01455e-05	41	0.168976	0.290909
Sorafenib	285	-0.00811631	0.89149	203	-0.0571476	0.418019	82	0.0488616	0.662889
S.Trityl.L.cysteine	285	0.101765	0.0863638	202	0.124872	0.0766122	83	0.0429237	0.700015
Sunitinib	285	0.348897	1.39957e-09	202	0.24249	0.000506887	83	0.193982	0.0788856
Temsirolimus	497	0.364816	0	453	0.334761	2.52687e-13	44	-0.0154204	0.920861
Thapsigargin	554	0.314666	3.37508e-14	473	0.314742	2.45381e-12	81	0.256925	0.0205913
Tipifarnib	554	0.309865	8.57092e-14	473	0.337134	4.90719e-14	81	0.171478	0.125849
TW.37	422	0.350819	1.15019e-13	421	0.351209	1.15019e-13	NA	NA	NA
Vinblastine	497	0.353936	4.44089e-16	453	0.357234	4.44089e-15	44	-0.100538	0.516116
Vinorelbine	559	0.238806	1.08808e-08	477	0.257063	1.22932e-08	82	0.0389214	0.728464
Vorinostat	479	0.45372	0	435	0.401322	0	44	0.211669	0.167796
VX.680	285	0.139119	0.0187881	202	0.10406	0.140535	83	0.179738	0.103965
VX.702	495	0.352426	6.66134e-16	452	0.246537	1.10165e-07	43	0.0248903	0.874117
WH.4.023	285	0.36575	1.89662e-10	202	0.501774	2.79776e-14	83	0.239268	0.0293669
WO2009093972	410	0.355205	1.23013e-13	409	0.356538	1.05249e-13	NA	NA	NA
WZ.1.84	285	0.365738	1.89957e-10	202	0.436329	8.51765e-11	83	-0.200125	0.0696812
X17.AAG	493	0.489335	0	452	0.435074	0	41	0.452132	0.00300006
X681640	467	0.371939	0	427	0.311335	4.74347e-11	40	0.00914341	0.955346
XMD8.85	282	0.32387	2.61772e-08	200	0.269883	0.000111196	82	0.241425	0.0288843
Z.LLNle.CHO	285	0.238721	4.67363e-05	202	0.315541	4.77932e-06	83	-0.185636	0.092915
ZM.447439	480	0.314722	1.69709e-12	439	0.259365	3.51903e-08	41	0.283598	0.0723598
