# Supplementary material for: Discovering novel pharmacogenomic biomarkers by imputing drug response in cancer patients from large genomics studies
Source: HighWire-hosted journal article supplement (doi:10.1101/gr.221077.117), 2017-08-28
Supplement: Supplemental_Table_S7.xlsx [file Supplemental_Table_S7.xlsx]

## Sheet: Supp Tab 7
Supplementary Table 7: Gene drug associations (for somatic protein coding changes) when controlling for cancer type. Associations are shown for FDR < 0.05. FDRs were calculated independently for each drug. A positive effect size implies that the mutation is predictive of drug resistance.
Drug.Gene	P-value	FDR	Effect Size (beta)
Nutlin.3a.TP53	2.61609e-77	4.37673e-74	0.260005
PD.0332991.RB1	5.29725e-40	8.8623e-37	0.564127
PD.0325901.TP53	9.69526e-25	1.62202e-21	0.15747
Methotrexate.GTF2I	1.78831e-24	2.99185e-21	0.522493
RDEA119.TP53	1.01975e-23	1.70604e-20	0.184407
X17.AAG.TP53	6.19632e-21	1.03664e-17	0.183203
AZD6482.GATA3	3.82006e-19	6.39097e-16	0.309155
CGP.082996.NFE2L2	1.0409e-17	1.74143e-14	-0.192316
CHIR.99021.TP53	5.94339e-17	9.9433e-14	0.0605908
Erlotinib.NFE2L2	2.18797e-15	3.66047e-12	-0.165903
AZ628.RB1	3.18348e-15	5.32596e-12	0.314658
PD.0325901.RB1	5.50856e-15	9.21583e-12	0.300246
Bortezomib.IDH1	6.05009e-15	1.01218e-11	0.287976
ATRA.GTF2I	1.11931e-14	1.87261e-11	0.27036
Bicalutamide.GTF2I	3.73946e-14	6.25611e-11	-0.0738715
SB590885.TP53	4.42016e-14	7.39493e-11	0.0635274
AZD6244.TP53	8.90778e-14	1.49027e-10	0.105783
AZ628.TP53	9.91728e-14	1.65916e-10	0.118831
Vorinostat.NFE2L2	2.77191e-13	4.6374e-10	0.155901
NVP.TAE684.IDH1	6.14589e-13	1.02821e-09	0.0959642
PAC.1.NFE2L2	1.52526e-12	2.55176e-09	0.211154
X17.AAG.NFE2L2	4.36687e-12	7.30577e-09	-0.368568
FTI.277.TP53	5.7927e-12	9.6912e-09	0.0350441
AZD.0530.NFE2L2	6.6966e-12	1.12034e-08	-0.201346
AZD6244.BRAF	9.57484e-12	1.60187e-08	-0.200009
CHIR.99021.BAP1	1.57378e-11	2.63293e-08	-0.137745
CHIR.99021.GTF2I	1.66113e-11	2.77907e-08	-0.183537
XMD8.85.GTF2I	2.11615e-11	3.54033e-08	0.17845
CI.1040.TP53	2.24015e-11	3.74776e-08	0.0284883
Lapatinib.NFE2L2	3.17064e-11	5.30448e-08	-0.168521
CEP.701.RB1	3.94726e-11	6.60376e-08	0.235006
PD.0332991.TP53	4.60603e-11	7.70589e-08	0.112878
ABT.888.GTF2I	5.55849e-11	9.29936e-08	0.135796
MG.132.TP53	5.88675e-11	9.84853e-08	0.064855
AZD6244.RB1	7.42473e-11	1.24216e-07	0.231144
ABT.888.KIT	8.03835e-11	1.34482e-07	-0.110952
Dasatinib.NFE2L2	9.84391e-11	1.64689e-07	-0.368136
CEP.701.TP53	9.98279e-11	1.67012e-07	0.0920182
RDEA119.RB1	1.02112e-10	1.70833e-07	0.297673
CGP.082996.TP53	1.03259e-10	1.72752e-07	-0.0533567
Axitinib.BRAF	1.52095e-10	2.54455e-07	0.120694
X17.AAG.IDH1	2.31291e-10	3.86949e-07	0.354594
PD.0325901.HRAS	4.37769e-10	7.32387e-07	-0.307511
Gefitinib.CTNNB1	4.49282e-10	7.51649e-07	0.195856
Nutlin.3a.IDH1	4.96443e-10	8.30549e-07	0.252045
Docetaxel.NFE2L2	6.37479e-10	1.0665e-06	-0.212503
AZ628.KRAS	6.38147e-10	1.06762e-06	-0.234514
Lapatinib.BRAF	8.95011e-10	1.49735e-06	-0.118231
RDEA119.BRAF	1.08733e-09	1.8191e-06	-0.232284
BMS.536924.RB1	1.2733e-09	2.13024e-06	0.203792
MG.132.RB1	1.2866e-09	2.15249e-06	0.150379
PD.0325901.KRAS	1.67136e-09	2.79618e-06	-0.220132
Lapatinib.NRAS	1.72705e-09	2.88935e-06	0.191366
BMS.536924.IDH1	1.73334e-09	2.89987e-06	0.231174
RDEA119.KRAS	2.06809e-09	3.45991e-06	-0.262119
AZD6244.CASP8	2.06905e-09	3.46153e-06	-0.299586
AZD6482.PIK3CA	3.40527e-09	5.69701e-06	-0.0954949
CGP.082996.GTF2I	4.38033e-09	7.32829e-06	0.182257
Bortezomib.TP53	4.42619e-09	7.40502e-06	0.0758138
CI.1040.RB1	4.53451e-09	7.58624e-06	0.062467
Vorinostat.BRAF	4.81527e-09	8.05595e-06	0.0950119
Axitinib.NRAS	5.70209e-09	9.5396e-06	-0.180881
RDEA119.HRAS	7.35532e-09	1.23055e-05	-0.341364
Mitomycin.C.GTF2I	1.02856e-08	1.72079e-05	0.294607
BX.795.GATA3	1.04936e-08	1.75558e-05	0.23161
PD.0325901.BRAF	1.10102e-08	1.84201e-05	-0.181857
Midostaurin.GTF2I	1.10524e-08	1.84906e-05	-0.274604
Bortezomib.PIK3CA	1.13622e-08	1.90089e-05	-0.0948407
BMS.754807.KIT	1.2304e-08	2.05846e-05	0.301665
Sunitinib.TP53	1.33971e-08	2.24133e-05	-0.0798783
NVP.BEZ235.TP53	1.89828e-08	3.17582e-05	0.0491372
PD.0325901.CASP8	2.35561e-08	3.94094e-05	-0.30248
NVP.BEZ235.BRAF	2.40742e-08	4.02761e-05	0.100895
AICAR.TP53	2.51716e-08	4.2112e-05	-0.0686761
FTI.277.GTF2I	2.63368e-08	4.40615e-05	-0.106564
Nutlin.3a.RB1	3.08547e-08	5.16199e-05	0.196226
CI.1040.CASP8	3.39421e-08	5.67851e-05	-0.0828169
Gefitinib.GTF2I	4.25023e-08	7.11063e-05	0.236223
Thapsigargin.NFE2L2	4.84508e-08	8.10582e-05	-0.32847
SB590885.NFE2L2	4.91021e-08	8.21478e-05	0.125117
BI.D1870.MT-ND5	5.92197e-08	9.90746e-05	0.195481
Dasatinib.IDH1	7.28264e-08	0.000121839	0.322077
RDEA119.IDH1	7.4768e-08	0.000125087	0.283497
AICAR.KIT	8.83332e-08	0.000147781	-0.204261
DMOG.GATA3	1.02014e-07	0.000170669	0.206914
Elesclomol.GTF2I	1.02814e-07	0.000172008	-0.287656
FH535.GTF2I	1.31338e-07	0.000219729	-0.150537
WZ.1.84.BAP1	1.34348e-07	0.000224764	-0.153196
Gemcitabine.NSD1	1.35982e-07	0.000227498	-0.332945
Erlotinib.IVL	1.39373e-07	0.00023317	0.156753
PD.173074.HRAS	1.46104e-07	0.000244432	0.109121
Thapsigargin.RB1	1.46854e-07	0.000245686	0.290681
Docetaxel.HMCN1	1.52261e-07	0.000254733	0.112681
DMOG.PIK3CA	1.89484e-07	0.000317007	0.0944346
PD.0325901.SMAD4	2.00549e-07	0.000335518	-0.245996
Erlotinib.NRAS	2.20594e-07	0.000369053	0.135869
Axitinib.MAP3K1	2.35315e-07	0.000393682	-0.121479
FH535.KRAS	2.37558e-07	0.000397435	-0.0930985
Vinblastine.PIK3CA	2.83885e-07	0.00047494	-0.0924509
FTI.277.BRAF	3.03202e-07	0.000507258	-0.0539751
Tipifarnib.RB1	3.10986e-07	0.000520279	0.137405
Sunitinib.PIK3CA	3.26584e-07	0.000546374	0.0923487
CI.1040.BRAF	3.63442e-07	0.000608039	-0.0448512
X17.AAG.GTF2I	3.63914e-07	0.000608828	-0.374344
Erlotinib.ZFHX4	4.26691e-07	0.000713854	0.0687439
FTI.277.UNC5D	4.27356e-07	0.000714967	0.0746134
WO2009093972.GTF2I	4.60872e-07	0.000771039	-0.147587
CGP.082996.BBS9	4.81536e-07	0.000805609	0.155122
Gemcitabine.FBXW7	5.50003e-07	0.000920156	-0.322365
Bortezomib.CDH1	5.67159e-07	0.000948856	-0.163516
BI.D1870.NOTCH1	5.82195e-07	0.000974013	-0.108593
Erlotinib.IDH1	5.91512e-07	0.000989599	0.109956
NVP.TAE684.GTF2I	6.0202e-07	0.00100718	-0.0875894
AZD7762.RB1	6.47241e-07	0.00108283	0.155835
CI.1040.CDH1	6.72436e-07	0.00112499	-0.0535651
X17.AAG.CDH1	6.86238e-07	0.00114808	-0.245784
ABT.263.PIK3CA	6.88628e-07	0.00115207	0.084884
Docetaxel.SETBP1	6.93277e-07	0.00115985	0.176321
Obatoclax.Mesylate.RB1	6.93983e-07	0.00116103	0.163002
SB590885.GTF2I	7.09283e-07	0.00118663	0.157145
AZ628.FRYL	7.15598e-07	0.0011972	0.233019
DMOG.RGS12	7.57272e-07	0.00126692	0.253997
AICAR.KRAS	7.62784e-07	0.00127614	0.144745
FTI.277.IVL	8.0699e-07	0.00135009	0.0972085
TW.37.MT-ND5	8.51037e-07	0.00142379	0.152024
BAY.61.3606.CASP8	8.57628e-07	0.00143481	-0.201077
WO2009093972.PIK3CA	8.65921e-07	0.00144869	-0.049247
AZD6244.KRAS	8.83887e-07	0.00147874	-0.165835
Gemcitabine.CASP8	9.35413e-07	0.00156495	-0.425649
NVP.BEZ235.RB1	9.50934e-07	0.00159091	0.107175
MG.132.CDH1	9.90075e-07	0.0016564	-0.122704
AZD6482.IVL	1.02059e-06	0.00170744	0.237629
AICAR.IVL	1.04426e-06	0.00174704	0.232792
MG.132.PIK3CA	1.11475e-06	0.00186497	-0.0620805
WO2009093972.MECOM	1.11762e-06	0.00186978	0.120944
AG.014699.ERBB2	1.19994e-06	0.0020075	0.134596
Lapatinib.FAT3	1.24091e-06	0.00207604	0.0783172
Docetaxel.USH2A	1.27288e-06	0.00212953	0.0933802
X17.AAG.KEAP1	1.29141e-06	0.00216053	-0.264026
PD.173074.GTF2I	1.29464e-06	0.00216594	0.117916
Midostaurin.RB1	1.31221e-06	0.00219533	0.154703
TW.37.TP53	1.46344e-06	0.00244834	0.0415117
Lapatinib.IDH1	1.48107e-06	0.00247782	0.12851
FTI.277.TRPS1	1.59569e-06	0.00266959	0.0708562
Lapatinib.IVL	1.68171e-06	0.0028135	0.172842
AG.014699.PPP1R3A	1.72102e-06	0.00287927	0.11503
AICAR.NFE2L2	1.75337e-06	0.00293339	-0.160421
NVP.BEZ235.NRAS	1.76803e-06	0.00295792	-0.142343
IPA.3.KIT	1.77728e-06	0.00297339	-0.135474
Erlotinib.RYR3	1.78703e-06	0.00298969	0.06877
Erlotinib.ARPP21	1.84655e-06	0.00308929	0.1198
Docetaxel.IVL	1.86751e-06	0.00312435	0.232995
TW.37.STK11	1.91967e-06	0.0032116	-0.157866
TW.37.BRAF	1.99832e-06	0.00334319	0.0847515
AZD6244.HRAS	2.03854e-06	0.00341048	-0.216225
TW.37.IDH1	2.07e-06	0.00346312	0.116999
NVP.BEZ235.ASTN2	2.09033e-06	0.00349712	0.119955
Cytarabine.FBXW7	2.12966e-06	0.00356291	-0.04386
Bicalutamide.TP53	2.27337e-06	0.00380335	0.0122907
BAY.61.3606.IDH1	2.31575e-06	0.00387425	-0.156768
XMD8.85.HRAS	2.34451e-06	0.00392236	0.107309
WZ.1.84.NRAS	2.4721e-06	0.00413583	0.165454
Bosutinib.CASP8	2.66217e-06	0.00445381	-0.063855
Mitomycin.C.NFE2L2	2.79805e-06	0.00468113	-0.174611
FTI.277.PCDHA11	2.97138e-06	0.00497112	0.0873658
Gefitinib.CNKSR2	2.98752e-06	0.00499812	0.185709
BAY.61.3606.FBXW7	3.15459e-06	0.00527763	-0.141252
NVP.BEZ235.NFE2L2	3.17262e-06	0.00530779	-0.110918
AG.014699.CDH18	3.19356e-06	0.00534283	0.126236
Lapatinib.RYR3	3.23065e-06	0.00540488	0.0812759
AICAR.KMT2D	3.2565e-06	0.00544812	-0.187711
AG.014699.FHOD3	3.36941e-06	0.00563703	0.141721
Docetaxel.ERBB4	3.43013e-06	0.0057386	0.155922
AG.014699.USH2A	3.90057e-06	0.00652565	0.0637704
ABT.263.GATA3	4.08339e-06	0.0068315	0.168945
Nilotinib.KIT	4.16404e-06	0.00696643	-0.0868099
CHIR.99021.RB1	4.17207e-06	0.00697987	0.0835352
WH.4.023.IDH1	4.2638e-06	0.00713334	0.205105
WO2009093972.KIAA1755	4.44998e-06	0.00744481	0.12501
FTI.277.HMCN1	4.54237e-06	0.00759939	0.0396878
ZM.447439.NFE2L2	4.59237e-06	0.00768304	-0.162728
PD.0325901.EP300	4.73655e-06	0.00792424	-0.180365
Gemcitabine.CDH1	4.77247e-06	0.00798434	-0.285188
Erlotinib.AGBL1	4.95151e-06	0.00828387	0.113126
PD.0332991.WDFY4	4.97982e-06	0.00833124	0.276189
PAC.1.KEAP1	4.99119e-06	0.00835026	0.139697
RDEA119.CASP8	5.05762e-06	0.0084614	-0.29613
ZM.447439.CASP8	5.1428e-06	0.0086039	-0.209393
Vinblastine.NSD1	5.47359e-06	0.00915731	-0.163261
Docetaxel.PREX2	5.53041e-06	0.00925237	0.143585
CEP.701.TRPS1	5.94608e-06	0.00994779	0.186869
Bleomycin.TP53	6.08227e-06	0.0101756	0.1022
Docetaxel.TRPS1	6.21281e-06	0.010394	0.165519
XMD8.85.IDH1	6.22133e-06	0.0104083	0.0916796
AICAR.ARID1A	6.42104e-06	0.0107424	0.110753
CGP.082996.KEAP1	6.51016e-06	0.0108915	-0.10383
MG.132.NFE2L2	6.69932e-06	0.011208	-0.121555
Sunitinib.STK11	6.99055e-06	0.0116952	-0.243181
Erlotinib.CAMTA1	7.0777e-06	0.011841	0.118212
AZD6244.EP300	7.50694e-06	0.0125591	-0.162957
Gefitinib.BAP1	7.8601e-06	0.0131499	-0.144473
RDEA119.CDH1	7.87136e-06	0.0131688	-0.208339
IPA.3.GTF2I	7.93258e-06	0.0132712	0.15376
Mitomycin.C.EP300	8.03457e-06	0.0134418	-0.156516
BI.D1870.GTF2I	8.10568e-06	0.0135608	0.16893
AG.014699.TP53	8.22046e-06	0.0137528	0.0403892
PD.0332991.MAP3K1	8.26886e-06	0.0138338	-0.197223
WO2009093972.IVL	8.28382e-06	0.0138588	0.134236
Elesclomol.SMAD4	8.34194e-06	0.0139561	0.197065
X681640.PIK3CA	8.46501e-06	0.014162	0.0652764
Temsirolimus.GTF2I	8.64452e-06	0.0144623	0.241475
NVP.BEZ235.TRPS1	8.7884e-06	0.014703	0.112648
NVP.BEZ235.CDH1	9.10004e-06	0.0152244	-0.0981511
Bleomycin.CDH1	9.29861e-06	0.0155566	-0.253278
Nutlin.3a.ATRX	9.35183e-06	0.0156456	0.120419
Axitinib.RICTOR	9.51647e-06	0.0159211	-0.146997
WZ.1.84.IDH1	9.60472e-06	0.0160687	0.130528
RDEA119.AKAP11	9.75577e-06	0.0163214	0.272707
Nilotinib.BAP1	9.84482e-06	0.0164704	-0.0758527
VX.702.PIK3CA	9.8665e-06	0.0165067	0.0310561
Vinblastine.CASP8	9.94635e-06	0.0166402	-0.217974
Lapatinib.MYO18B	1.0166e-05	0.0170077	0.0965657
VX.702.GTF2I	1.07055e-05	0.0179103	0.0904613
RDEA119.SYNE2	1.07617e-05	0.0180043	0.155888
X681640.ERBB2	1.10584e-05	0.0185008	0.153417
X681640.NOTCH3	1.16683e-05	0.019521	-0.147149
Cytarabine.CDH1	1.18245e-05	0.0197824	-0.0392517
MG.132.ASTN1	1.25141e-05	0.0209361	0.106642
Bosutinib.KIT	1.26755e-05	0.0212061	-0.0522471
DMOG.MAP3K1	1.2997e-05	0.021744	0.158518
Cisplatin.CCT8L2	1.32581e-05	0.0221808	-0.175778
DMOG.DOCK3	1.36718e-05	0.0228729	0.185499
MG.132.IDH1	1.38096e-05	0.0231035	0.123286
Vorinostat.KEAP1	1.41705e-05	0.0237072	0.0949795
Cytarabine.TP53	1.41982e-05	0.0237535	0.0153801
FTI.277.DNAH14	1.42544e-05	0.0238477	0.0750567
MG.132.GATA3	1.46873e-05	0.0245719	0.118476
AG.014699.ITGA4	1.48409e-05	0.0248289	0.139401
FTI.277.SCN2A	1.48509e-05	0.0248456	0.0565866
PLX4720.KIAA1211	1.50661e-05	0.0252055	-0.115074
Gemcitabine.RB1	1.5185e-05	0.0254045	0.26669
Erlotinib.PCDHA10	1.52009e-05	0.0254312	0.11276
IPA.3.DACH1	1.53843e-05	0.025738	-0.149385
FH535.TP53	1.57467e-05	0.0263442	0.0327776
FTI.277.RB1	1.61316e-05	0.0269882	0.0549629
PAC.1.SETBP1	1.70369e-05	0.0285027	-0.132787
Thapsigargin.GTF2I	1.70742e-05	0.0285652	-0.357694
Dasatinib.TPTE2	1.76216e-05	0.0294809	0.319148
Nilotinib.LAMB3	1.81924e-05	0.0304358	0.0985177
Thapsigargin.CTNNB1	1.88274e-05	0.0314983	-0.259421
FTI.277.SPTBN1	1.89529e-05	0.0317082	0.0694761
Vorinostat.NSD1	1.90911e-05	0.0319394	-0.0860588
DMOG.NCOA1	1.9771e-05	0.0330769	0.223366
AZD6482.BRAF	2.02459e-05	0.0338713	0.110879
NVP.BEZ235.CASP8	2.03248e-05	0.0340034	-0.131232
AZD7762.FBXW7	2.04001e-05	0.0341294	-0.139385
Axitinib.TP53	2.04312e-05	0.0341813	0.0388617
WH.4.023.NID2	2.05278e-05	0.034343	0.209852
AZ628.IDH1	2.05682e-05	0.0344107	0.194798
WO2009093972.CLSTN2	2.09652e-05	0.0350747	0.0987536
ATRA.HRAS	2.13703e-05	0.0357525	0.127006
Lapatinib.DST	2.13825e-05	0.035773	0.0711316
Erlotinib.DLEC1	2.14529e-05	0.0358908	0.10866
Lapatinib.PIK3CA	2.16536e-05	0.0362264	-0.0509817
SB590885.MECOM	2.17864e-05	0.0364487	-0.114184
CI.1040.IDH1	2.22589e-05	0.0372391	0.0517133
PD.0325901.ERBB2	2.23125e-05	0.0373289	-0.19984
BIBW2992.BRAF	2.27771e-05	0.0381061	-0.0835695
Erlotinib.ABCA6	2.29697e-05	0.0384283	0.11134
AZD6482.CLSTN2	2.31413e-05	0.0387154	0.158641
AG.014699.UBR5	2.4008e-05	0.0401653	0.106854
Obatoclax.Mesylate.TCHHL1	2.41201e-05	0.040353	-0.205817
Obatoclax.Mesylate.HMCN1	2.42959e-05	0.040647	0.0942048
BI.D1870.ERBB2	2.45631e-05	0.0410941	0.130044
Temsirolimus.WDFY4	2.4778e-05	0.0414535	0.21459
BI.D1870.CEP192	2.53845e-05	0.0424683	-0.137757
WH.4.023.GTF2I	2.64172e-05	0.044196	-0.246477
CI.1040.KRAS	2.66882e-05	0.0446494	-0.0425224
Docetaxel.MT-ND5	2.69844e-05	0.0451448	0.190127
Nutlin.3a.GPR112	2.71876e-05	0.0454849	0.137444
PD.0332991.CTNNB1	2.72396e-05	0.0455719	-0.197377
Lapatinib.MUC12	2.74071e-05	0.0458521	0.11007
Bosutinib.COBLL1	2.76503e-05	0.0462589	-0.0603476
Bosutinib.GTF2I	2.78731e-05	0.0466317	0.0608648
WZ.1.84.TGFBR2	2.83688e-05	0.0474609	-0.157301
Camptothecin.MED13	2.91183e-05	0.048715	-0.215843
AZ628.SYNE2	2.91418e-05	0.0487543	0.128449
Docetaxel.ERBB2	2.92215e-05	0.0488876	0.161744
Bicalutamide.RB1	2.95134e-05	0.0493759	0.0271611
AG.014699.WBSCR17	2.95818e-05	0.0494904	0.11771
X17.AAG.KRAS	2.96172e-05	0.0495496	-0.194172
