# Supplementary material for: Discovering novel pharmacogenomic biomarkers by imputing drug response in cancer patients from large genomics studies
Source: HighWire-hosted journal article supplement (doi:10.1101/gr.221077.117), 2017-08-28
Supplement: Supplemental_Table_S8.xlsx [file Supplemental_Table_S8.xlsx]

## Sheet: Supp Tab 8
Supplementary Table 8: Gene drug associations (for somatic protein coding changes) when controlling for GLDS. Associations are shown for top 1000 P-values. FDRs were calculated independently for each drug. A positive effect size implies that the mutation is predictive of drug resistance.
Drug.Gene	P-value	FDR	Effect Size (beta)
Nutlin.3a.TP53	1.5868e-58	2.65471e-55	0.147863
PLX4720.BRAF	3.15853e-38	5.28422e-35	-0.13167
Thapsigargin.KRAS	7.27415e-31	1.21696e-27	-0.301089
Erlotinib.KRAS	1.91256e-30	3.19971e-27	0.0922084
Mitomycin.C.IDH1	1.33636e-29	2.23573e-26	0.220603
Dasatinib.IDH1	1.0311e-26	1.72502e-23	-0.216078
Sunitinib.IDH1	3.19681e-26	5.34826e-23	0.136518
TW.37.IDH1	5.1072e-25	8.54435e-22	0.139785
CHIR.99021.BRAF	3.14441e-24	5.26061e-21	-0.0821126
Cytarabine.BRAF	5.65812e-22	9.46604e-19	0.0180186
Lapatinib.GNAQ	1.20993e-21	2.02421e-18	0.170101
SB590885.TP53	3.19346e-20	5.34266e-17	0.0495376
Mitomycin.C.NFE2L2	6.05162e-20	5.06218e-17	-0.192749
WZ.1.84.BAP1	7.07934e-20	1.18437e-16	-0.120922
AZ628.BRAF	9.49887e-20	1.58916e-16	0.156058
NVP.TAE684.BRAF	2.02733e-19	3.39173e-16	0.0298201
RDEA119.BRAF	2.43122e-19	4.06743e-16	-0.140053
Gemcitabine.Unknown	2.48079e-19	4.15036e-16	-0.180642
Mitomycin.C.TP53	3.69719e-19	2.0618e-16	0.0696458
X681640.IDH1	7.17353e-19	1.20013e-15	0.149495
IPA.3.BRAF	4.65458e-18	7.78711e-15	-0.076336
Erlotinib.IDH1	6.45158e-18	5.39675e-15	0.0905796
CGP.082996.GTF2I	1.06188e-17	1.77653e-14	0.135601
AZD6482.ZFPM1	1.59286e-17	2.66486e-14	0.220316
PLX4720.PCDHAC2	1.66169e-17	1.39e-14	-0.145356
BX.795.IDH1	2.69729e-17	4.51257e-14	0.111147
Lapatinib.KEAP1	3.2388e-17	2.70926e-14	0.102432
PD.0332991.RB1	4.32849e-17	7.24157e-14	0.160627
Nutlin.3a.IDH1	1.62715e-16	1.36111e-13	0.194918
WZ.1.84.IDH1	2.72434e-16	2.27891e-13	-0.0991599
BMS.754807.KRAS	3.21847e-16	5.17805e-13	-0.152677
FH535.Unknown	3.75504e-16	6.28219e-13	0.0580811
BI.D1870.GNAQ	4.36115e-16	7.29621e-13	0.118354
PAC.1.ZFPM1	5.09152e-16	8.51812e-13	0.188188
BMS.754807.GTF2I	6.19013e-16	5.17805e-13	0.265215
Bleomycin.GTF2I	1.1168e-15	1.86841e-12	0.308049
Lapatinib.Unknown	1.2637e-15	7.04725e-13	0.0688821
Methotrexate.IDH1	1.71787e-15	2.874e-12	0.106029
FH535.IDH1	2.32185e-15	1.94223e-12	-0.0735055
Lapatinib.BRAF	3.01299e-15	1.26018e-12	-0.0663583
Gefitinib.BRAF	6.77606e-15	1.13363e-11	0.0899465
VX.702..	1.03002e-14	1.72322e-11	0.0657468
Thapsigargin.CTNNB1	1.49948e-14	1.25432e-11	-0.273649
Sunitinib.KRAS	6.38674e-14	5.34251e-11	0.0753511
X681640.BRAF	6.96831e-14	5.82899e-11	0.0966185
Bortezomib.PIK3CA	1.19863e-13	2.00531e-10	-0.0592084
CEP.701.Unknown	1.92065e-13	3.21324e-10	0.0847285
XMD8.85.BRAF	2.22769e-13	3.72693e-10	0.0362929
CHIR.99021.BAP1	3.34191e-13	2.7955e-10	-0.0858359
TW.37.VHL	4.46193e-13	3.7324e-10	0.0925285
FH535.VHL	5.48123e-13	3.0567e-10	0.0631892
FTI.277.ZFPM1	1.08346e-12	1.81264e-09	-0.0672158
CHIR.99021.TP53	1.12567e-12	6.2775e-10	0.0305257
TW.37.STK11	1.23984e-12	6.91419e-10	-0.142823
AZD.0530.STK11	1.58497e-12	2.65166e-09	-0.125839
BAY.61.3606.IDH1	3.56076e-12	5.95715e-09	-0.0991927
PD.173074.BRAF	4.05371e-12	6.78186e-09	-0.0411644
CEP.701.EGFR	7.13608e-12	5.96933e-09	0.0931121
ZM.447439.Unknown	1.26381e-11	2.11436e-08	-0.0820118
Temsirolimus.KRAS	1.63362e-11	2.73304e-08	0.0976985
AZD6482.ERCC2	2.60517e-11	2.17922e-08	0.161657
AZD.0530.Unknown	6.78532e-11	5.67592e-08	-0.0595774
PAC.1.ERCC2	7.04458e-11	5.89279e-08	0.141827
BMS.536924.ZFPM1	8.29928e-11	1.38847e-07	-0.14803
PD.0325901.VHL	9.87657e-11	1.65235e-07	-0.116581
Cytarabine.GNAQ	9.9246e-11	8.30193e-08	-0.0256222
AZD.0530.IDH1	1.40583e-10	7.83987e-08	-0.0762927
Gemcitabine.ZFPM1	1.42545e-10	1.19239e-07	-0.265508
Temsirolimus.BRAF	1.45041e-10	1.21327e-07	-0.0912606
BIBW2992.BRAF	2.01477e-10	3.37071e-07	0.0663047
BMS.536924..	2.03325e-10	1.49961e-07	-0.128859
Temsirolimus..	2.35948e-10	1.3158e-07	-0.166132
Cytarabine.GTF2I	2.43688e-10	1.35897e-07	-0.0211095
BMS.536924.PTEN	2.68908e-10	1.49961e-07	0.0718619
Gefitinib.CTNNB1	2.69906e-10	2.25777e-07	0.102433
PAC.1.STK11	3.65513e-10	2.03834e-07	0.13833
Mitomycin.C.Unknown	3.97683e-10	1.66331e-07	-0.0940538
CGP.082996.NFE2L2	4.41026e-10	3.68918e-07	-0.0790761
Obatoclax.Mesylate.VHL	4.82064e-10	8.06493e-07	-0.0957798
Methotrexate.Unknown	5.22357e-10	4.36951e-07	-0.0635375
AZ628.VHL	5.35342e-10	4.47814e-07	0.134442
Vorinostat.IDH1	6.28302e-10	1.05115e-06	-0.0537918
Tipifarnib.KRAS	6.85458e-10	1.14677e-06	0.0515485
Sunitinib.GTF2I	6.88123e-10	3.83743e-07	-0.107885
XMD8.85.TP53	9.34077e-10	7.81355e-07	-0.0159078
RDEA119.IDH1	9.7279e-10	8.13739e-07	0.125887
ABT.888.KIT	1.09197e-09	1.82687e-06	-0.0352971
Vinblastine.TP53	1.20583e-09	2.01735e-06	-0.039343
SB590885..	1.20835e-09	1.01079e-06	0.115622
ZM.447439.TP53	1.27686e-09	1.0681e-06	-0.0379204
NVP.BEZ235.ZFPM1	1.38492e-09	2.31696e-06	-0.0943984
PD.0332991.IDH1	1.44509e-09	1.20882e-06	-0.119268
NVP.TAE684.VHL	1.82848e-09	1.52952e-06	-0.0248529
ZM.447439.KEAP1	1.99559e-09	1.11287e-06	-0.10306
BMS.536924.KRAS	2.12098e-09	8.87099e-07	-0.0670871
AG.014699.ST6GAL2	2.13045e-09	3.44606e-06	0.111613
Obatoclax.Mesylate.KEAP1	2.18083e-09	1.82426e-06	0.105744
AZ628.TP53	2.40846e-09	1.18452e-06	-0.0543259
AZ628.KRAS	2.83207e-09	1.18452e-06	-0.106076
NVP.BEZ235.EPHA5	3.28757e-09	2.75005e-06	0.0635712
WO2009093972.VHL	3.62062e-09	6.0573e-06	0.0511616
Nutlin.3a.EGFR	4.06494e-09	2.26688e-06	-0.126192
AG.014699.Unknown	4.11961e-09	3.44606e-06	0.0600338
PLX4720.PCDHGC5	4.70001e-09	2.62104e-06	-0.107689
Axitinib.ZFPM1	4.75333e-09	7.95232e-06	0.118677
Cisplatin.BRAF	5.48468e-09	9.17587e-06	0.0657362
Nutlin.3a.KRAS	6.39787e-09	2.67591e-06	0.10674
BIBW2992.NFE2L2	6.54227e-09	5.47261e-06	0.0870554
WH.4.023.ZFPM1	6.81638e-09	1.14038e-05	0.160844
X17.AAG.ARID1A	8.33187e-09	9.06975e-06	-0.132286
AZD6482.GNAQ	8.62799e-09	4.81154e-06	-0.152523
Mitomycin.C.ZFPM1	8.83691e-09	2.95683e-06	0.17791
Sunitinib.BRAF	9.48869e-09	3.96865e-06	0.0568005
Bortezomib.CDH1	9.67736e-09	8.09511e-06	-0.0898506
X17.AAG.GNAQ	1.08425e-08	9.06975e-06	0.277656
PLX4720.C6	1.14432e-08	4.78612e-06	-0.0859469
CHIR.99021.Unknown	1.2257e-08	5.12648e-06	0.0475813
Erlotinib.STK11	1.47503e-08	8.22577e-06	0.088741
AG.014699.CDH18	1.666e-08	9.29073e-06	0.0847843
NVP.TAE684.GTF2I	1.70565e-08	9.51183e-06	-0.0333843
MG.132.KRAS	1.72145e-08	2.87998e-05	0.0651241
Camptothecin.IDH1	1.74269e-08	2.91551e-05	-0.101913
NVP.BEZ235.FAM5C	1.83248e-08	1.02191e-05	0.0572233
Docetaxel.ARID1A	1.86991e-08	3.12835e-05	0.0514485
ABT.888.GNAQ	2.02324e-08	1.69244e-05	0.0440327
FH535.FBXW7	2.09058e-08	8.74385e-06	-0.0508271
Mitomycin.C.ATRX	2.50802e-08	6.9932e-06	0.0798912
PLX4720.RPTN	2.65083e-08	8.86967e-06	-0.101105
Dasatinib.CIC	2.66721e-08	2.23112e-05	-0.119793
AZD6482.OTOP1	2.85468e-08	1.19397e-05	0.122665
Obatoclax.Mesylate.ZFPM1	3.20486e-08	1.78725e-05	0.141039
VX.702.NFE2L2	3.24068e-08	2.71083e-05	0.036407
Erlotinib.TP53	3.3321e-08	1.39365e-05	0.0231501
TW.37.KRAS	3.345e-08	1.39905e-05	0.0585962
PD.0332991.CTNNB1	3.49902e-08	1.95129e-05	-0.114711
Lapatinib.STK11	3.49917e-08	1.17082e-05	0.0920965
DMOG.PIK3CA	3.66808e-08	6.13671e-05	0.0656259
CEP.701.TP53	3.69852e-08	2.06254e-05	0.0330065
WH.4.023.CIC	4.06341e-08	3.39904e-05	-0.102521
Cytarabine.VHL	4.38447e-08	1.74303e-05	-0.012793
AZD6244.IDH1	4.95339e-08	8.28702e-05	0.0801294
ZM.447439.RYR2	5.12574e-08	1.9882e-05	-0.0492988
Cytarabine.PCDHAC2	5.20929e-08	1.74303e-05	0.0168728
BMS.754807.IDH1	5.38637e-08	3.0038e-05	-0.132706
AZD7762.TP53	5.74803e-08	9.61645e-05	-0.0355994
ZM.447439.CSMD3	6.11482e-08	1.9882e-05	-0.0483847
PLX4720.C15orf2	6.4308e-08	1.65164e-05	-0.0856788
AZ628.Unknown	6.56966e-08	2.19821e-05	0.0956957
AICAR.KRAS	6.63903e-08	6.95872e-05	0.0737205
PLX4720..	6.91061e-08	1.65164e-05	0.103287
ZM.447439.SI	7.13043e-08	1.9882e-05	-0.0658282
AICAR.STK11	8.31886e-08	6.95872e-05	0.140861
Dasatinib.Unknown	8.69226e-08	4.84739e-05	-0.0833232
CI.1040.VHL	8.70163e-08	0.000145578	-0.0152866
Nilotinib.BRAF	8.78118e-08	0.000146909	-0.0287646
Gemcitabine..	9.35871e-08	5.21904e-05	-0.196657
NVP.BEZ235.C15orf2	1.08743e-07	4.23506e-05	0.061319
ATRA.ATRX	1.11114e-07	0.000185894	-0.0376407
Mitomycin.C.STK11	1.25757e-07	3.0056e-05	-0.154753
NVP.BEZ235.FSTL5	1.26571e-07	4.23506e-05	0.0613557
WH.4.023.IDH1	1.28128e-07	7.14525e-05	-0.0928857
AG.014699.USH2A	1.48711e-07	6.21985e-05	0.0400928
AZD6482.DSPP	1.51883e-07	5.082e-05	0.106702
PAC.1.TPO	1.54821e-07	6.47539e-05	0.0788784
DMOG.IDH1	1.61243e-07	0.00013488	-0.126153
AZ628..	1.78366e-07	4.97343e-05	-0.16779
FTI.277.HERC1	1.80505e-07	0.000150992	0.0286409
WZ.1.84.TP53	2.01123e-07	9.23453e-05	-0.0251838
NVP.BEZ235.Unknown	2.0622e-07	5.7501e-05	0.0399902
WZ.1.84.GNAQ	2.2079e-07	9.23453e-05	-0.100923
AZD.2281.PMFBP1	2.57366e-07	0.000279196	0.0776226
CGP.082996.ASXL2	2.59728e-07	0.000144841	-0.0758362
PLX4720.FCRL5	2.65252e-07	5.54708e-05	-0.0857932
Gefitinib.KRAS	2.75204e-07	0.000153472	0.0607813
Erlotinib.KEAP1	2.81281e-07	9.41167e-05	0.0586089
NVP.TAE684.IDH1	2.83521e-07	0.000118583	-0.0224081
Sunitinib..	2.88546e-07	9.65476e-05	0.0928103
NVP.BEZ235.STXBP5L	2.88937e-07	6.9056e-05	0.0608282
X17.AAG.KRAS	2.94542e-07	0.000164256	-0.121769
Vorinostat.NFE2L2	2.9604e-07	0.000247638	0.048147
Obatoclax.Mesylate.STK11	3.00672e-07	0.000125756	0.124131
Temsirolimus.MUC4	3.05728e-07	0.000127871	-0.0528924
AZD7762.LRIG1	3.10066e-07	0.000194028	-0.118911
Midostaurin.KEAP1	3.14064e-07	0.000506663	-0.0820498
BMS.754807.PBRM1	3.19745e-07	0.000133734	-0.104693
AZD.2281.PCDHGC5	3.33767e-07	0.000279196	0.0704107
SB590885.PCDHAC2	3.34745e-07	0.000186676	-0.0867264
Tipifarnib.Unknown	3.39013e-07	0.000283585	0.0423801
AZD7762..	3.47928e-07	0.000194028	0.118238
Bortezomib.VHL	3.66769e-07	0.000204535	0.07767
FH535.PCDHGC5	3.69092e-07	0.000123498	-0.0635381
Nutlin.3a.GTF2I	3.77166e-07	0.0001262	-0.16277
AZD6244.KRAS	3.84588e-07	0.000321708	-0.0577704
X17.AAG.KEAP1	4.29557e-07	0.000179662	-0.166232
AZD6482.LRIG1	4.40079e-07	0.000122709	0.117867
DMOG.Unknown	4.64134e-07	0.000209452	-0.0933409
Erlotinib.ARPP21	4.89545e-07	0.000136502	0.0654817
PD.0332991.Unknown	4.9804e-07	0.000208305	-0.0762005
DMOG.BRAF	5.00783e-07	0.000209452	-0.0916363
AG.014699.VHL	5.01857e-07	0.000114358	-0.0630452
AG.014699.RYR2	5.23713e-07	0.000114358	0.0382268
Sunitinib.GNAQ	5.46349e-07	0.00015234	-0.10353
AG.014699.C2CD3	5.85466e-07	0.000114358	0.0801555
AZD.0530.KRAS	5.87633e-07	0.000245778	-0.0462963
AG.014699.KCNH7	6.15592e-07	0.000114358	0.0754476
WZ.1.84.PXDNL	6.15778e-07	0.000206039	-0.0549708
NVP.BEZ235.ANK2	6.2619e-07	0.000118259	0.038723
DMOG.SF3B1	6.34832e-07	0.000212415	-0.133187
CGP.082996.KRAS	6.37917e-07	0.000266809	0.0453131
AG.014699.PTPRD	6.48053e-07	0.000114358	0.0588949
Nutlin.3a.NFE2L2	6.56253e-07	0.000182985	-0.127428
Docetaxel.BRAF	6.56484e-07	0.000482885	-0.0457037
SB590885.ZFPM1	6.76977e-07	0.000283146	0.105427
AG.014699.PEG3	6.83551e-07	0.000114358	0.0579566
NVP.BEZ235.FLG2	6.95483e-07	0.000118259	0.0409741
BMS.754807.GATA3	7.00859e-07	0.000234508	-0.128938
Gemcitabine.BAP1	7.04213e-07	0.000294537	-0.141825
NVP.BEZ235.ST6GAL2	7.06866e-07	0.000118259	0.0696023
Mitomycin.C.SMAD4	7.35471e-07	0.000153805	0.112824
AG.014699.AKAP12	7.53297e-07	0.00011457	0.0953054
Midostaurin.NFE2L2	7.60137e-07	0.000506663	-0.0788523
DMOG.STK11	7.66254e-07	0.000213657	-0.17707
IPA.3.ZFHX4	7.66855e-07	0.000641474	-0.0378532
Axitinib.IDH1	7.82993e-07	0.000654974	0.0641122
ZM.447439.GPRC6A	8.14844e-07	0.000180578	-0.108305
AZD6482.GTF2I	8.40872e-07	0.000200968	0.110439
ZM.447439.SLC17A6	8.63495e-07	0.000180578	-0.107675
Docetaxel.IDH1	8.65903e-07	0.000482885	0.0594162
AG.014699.CSMD1	8.83551e-07	0.000123182	0.0438889
Midostaurin.GTF2I	9.08542e-07	0.000506663	-0.0977696
PD.0325901.KMT2C	9.27944e-07	0.000776225	-0.125325
Thapsigargin.SPOP	9.38897e-07	0.000523591	-0.228353
FH535.GNAQ	9.49653e-07	0.000264795	0.0730135
BMS.754807..	9.64427e-07	0.000268914	-0.166058
AZD.2281.CDH12	9.73974e-07	0.000543153	0.0523977
Erlotinib.TSHZ3	9.75077e-07	0.000208909	0.0553261
Erlotinib.PXDNL	9.98966e-07	0.000208909	0.0465879
NVP.BEZ235.CSMD3	1.0067e-06	0.00015311	0.0276994
BI.D1870.PCDHAC2	1.01654e-06	0.000850338	-0.0557137
AG.014699.LPA	1.02657e-06	0.000132111	0.0712681
AZD6482.MUC5B	1.03658e-06	0.000216775	0.0531224
Mitomycin.C.KEAP1	1.04466e-06	0.000194191	-0.105002
BIBW2992.KRAS	1.07336e-06	0.000598578	0.0520286
AZD.0530.EPHA5	1.0889e-06	0.000364347	-0.0625667
Gemcitabine.GPR112	1.14571e-06	0.000383354	-0.112326
AG.014699.TTN	1.15624e-06	0.00013817	0.0236262
AZD6482.TVP23C	1.30853e-06	0.000243242	0.104352
TW.37.TP53	1.31927e-06	0.000441427	0.0262951
ZM.447439.ITSN2	1.32761e-06	0.000246788	-0.100929
ABT.888.BRAF	1.44734e-06	0.000807133	-0.0180203
AG.014699.PAPPA2	1.45273e-06	0.000162028	0.0536342
Bosutinib.KRAS	1.54826e-06	0.00259025	0.00940087
AZD.0530.EGFR	1.61357e-06	0.000449916	-0.0516628
Nutlin.3a..	1.61432e-06	0.000385824	-0.159357
MG.132.IDH1	1.61722e-06	0.0013528	-0.0718968
AG.014699.DNAH5	1.63159e-06	0.000166913	0.044288
SB590885.STK11	1.66005e-06	0.000555453	-0.0976637
AG.014699.ITGA4	1.69607e-06	0.000166913	0.0862595
PAC.1.LRIG1	1.80653e-06	0.000604466	0.0999091
PD.173074.CTNNB1	1.81955e-06	0.00152206	-0.0397945
AZD6482.PODXL	1.87193e-06	0.000313174	0.11936
ZM.447439.BRAF	1.93419e-06	0.000323591	0.0574309
PD.0332991.TP53	1.94676e-06	0.000651386	-0.0372023
AG.014699.MXRA5	1.96685e-06	0.000182807	0.0543719
FTI.277.TP53	1.96808e-06	0.00109753	0.0114805
Methotrexate.CDC27	1.97256e-06	0.00110003	-0.069583
Bleomycin.BRAF	1.97687e-06	0.00165365	-0.102982
AZD.2281.MXRA5	1.99809e-06	0.000835701	0.0420635
X17.AAG.BTBD11	2.03762e-06	0.000681787	-0.212154
BMS.754807.EGFR	2.08348e-06	0.000497952	0.105024
Cytarabine.GPR98	2.1729e-06	0.000605878	0.00776303
AZD6482.CRIPAK	2.2808e-06	0.000346889	0.106082
Erlotinib.ADAMTSL3	2.34835e-06	0.000436533	0.0554709
VX.702.FRG1B	2.37099e-06	0.00102848	0.0318884
Nilotinib.CDH1	2.39673e-06	0.00200486	0.0325393
Axitinib.SPOP	2.44557e-06	0.00136382	0.0843307
VX.702.PIK3CA	2.45901e-06	0.00102848	0.0142851
X681640..	2.49514e-06	0.00139146	0.111491
AG.014699.FAM75A6	2.50776e-06	0.000220815	0.0921405
ZM.447439.KRAS	2.53383e-06	0.000385372	-0.0574828
AZD6482.MAP3K1	2.54005e-06	0.000354125	0.0773737
BI.D1870.MYPN	2.67663e-06	0.00149267	0.0553988
ZM.447439.TPTE	2.77816e-06	0.000387322	-0.0732408
Obatoclax.Mesylate.ERCC2	3.05354e-06	0.000984146	0.111509
PAC.1.GTF2I	3.25268e-06	0.000820922	-0.0941564
AZD.2281.NOS1	3.3278e-06	0.00111348	0.053557
XMD8.85.CIC	3.34526e-06	0.00186554	0.0321466
PD.0325901.IDH1	3.35065e-06	0.00186854	0.0894605
Camptothecin.C15orf2	3.37468e-06	0.00282292	0.0968908
PAC.1.ATXN1	3.43482e-06	0.000820922	0.0932661
ABT.888.Unknown	3.47134e-06	0.00145189	0.0174851
Gemcitabine.LRIG1	3.4848e-06	0.000971678	-0.172191
Obatoclax.Mesylate.NFE2L2	3.52951e-06	0.000984146	0.0818951
Bortezomib.BRAF	3.60452e-06	0.00150759	-0.0569299
Cytarabine.PBRM1	3.80037e-06	0.000908288	-0.00959956
WZ.1.84.ERBB3	3.81625e-06	0.00101493	-0.0655394
BMS.536924.EGFR	3.89279e-06	0.00130253	0.0611393
ZM.447439.SLITRK2	4.06315e-06	0.000505876	-0.0906067
Bicalutamide.ZFPM1	4.14364e-06	0.0069323	0.020065
Erlotinib.ZFPM1	4.22167e-06	0.000706286	-0.0756538
ZM.447439.ZFPM1	4.23327e-06	0.000505876	0.113566
WZ.1.84.PCDHA10	4.24658e-06	0.00101493	-0.0723167
NVP.BEZ235.ATRNL1	4.25571e-06	0.000593316	0.0541797
WO2009093972.STK11	4.68372e-06	0.00391793	-0.0626752
Gemcitabine.ERCC2	4.83192e-06	0.00115483	-0.176495
AZ628.SYNPO2	4.8453e-06	0.00115803	0.151011
AZD6482.PBRM1	4.89487e-06	0.000629932	-0.0636805
Midostaurin.ABCA13	4.94015e-06	0.00206622	-0.0476151
NVP.BEZ235.FBXL7	5.25428e-06	0.000676186	0.0643223
X17.AAG.BRAF	5.26923e-06	0.00146924	-0.105756
AICAR.CTNNB1	5.41166e-06	0.00301791	-0.0847232
VX.702.BTBD11	5.47218e-06	0.00183099	0.0407538
AG.014699.PTPRC	5.71303e-06	0.000477895	0.0699491
ABT.263.CIC	6.10374e-06	0.00391677	-0.0914605
Vinblastine.ARID1A	6.1596e-06	0.0051525	0.0557672
DMOG.PTEN	6.20304e-06	0.00148253	0.0849416
Gemcitabine.TRPC5	6.22167e-06	0.00118724	-0.169526
Gemcitabine.MMRN1	6.3868e-06	0.00118724	-0.166231
PD.173074.LRP5	6.39036e-06	0.00356369	-0.0507387
PLX4720.PRB2	6.40197e-06	0.00119006	-0.0849914
NVP.BEZ235.LRRC4C	6.47455e-06	0.000725185	0.0525691
NVP.BEZ235.SEMA5A	6.50196e-06	0.000725185	0.0532001
ABT.263.PBRM1	6.56227e-06	0.00391677	-0.0722709
AG.014699.NRXN1	6.57453e-06	0.000523771	0.0523853
PAC.1.KEAP1	6.66671e-06	0.00139418	0.0725919
Gefitinib.EPHA7	6.71387e-06	0.00280808	-0.0872043
WH.4.023.TPTE2	6.74128e-06	0.00281954	0.107435
Lapatinib.ENPP2	6.82216e-06	0.00190225	0.0680752
AZD7762.PODXL	6.91856e-06	0.00242136	-0.112409
Midostaurin.GNAQ	6.93078e-06	0.00231904	0.105913
ABT.263..	7.0235e-06	0.00391677	-0.120265
ZM.447439.DNAH9	7.05875e-06	0.000787286	-0.052244
AG.014699.PDGFRA	7.09693e-06	0.000537491	0.0702586
AZD7762.ZFPM1	7.23657e-06	0.00242136	-0.1163
AZ628.FLG2	7.263e-06	0.00151888	0.085292
AZD6482.BRAF	7.47318e-06	0.000893046	0.0564301
AG.014699.DNAH3	7.48938e-06	0.000537491	0.0469873
BAY.61.3606.COL6A5	7.62119e-06	0.00310153	-0.0731297
AG.014699.OR4N2	7.71057e-06	0.000537491	0.07935
Nutlin.3a.BRAF	7.7173e-06	0.00161388	0.0805709
DMOG.PTCH1	7.72286e-06	0.00161504	0.128954
ATRA.NFE2L2	7.83429e-06	0.00655339	-0.0469922
RDEA119.CTNNB1	7.956e-06	0.0044368	-0.0970687
Cisplatin.KRAS	7.98031e-06	0.00620252	-0.051189
AZD.2281.PTPRU	8.04618e-06	0.00224354	-0.0647428
FTI.277.CRIPAK	8.06795e-06	0.00337442	-0.0364947
PD.0325901.NRAS	8.25971e-06	0.00345462	-0.111633
Erlotinib.CDH1	8.2994e-06	0.00126226	0.0455283
ZM.447439.OR4Q3	8.36312e-06	0.000870292	-0.102686
BAY.61.3606.MUC4	8.39274e-06	0.00310153	-0.0351347
AZD6482.LRRC4C	8.47544e-06	0.000945294	0.086108
VX.702.UNC79	8.61805e-06	0.002403	0.0341218
PAC.1.SPOP	8.6777e-06	0.00161309	0.0914609
ZM.447439.APC	8.84337e-06	0.000870292	-0.0677679
Bosutinib.BAP1	8.84572e-06	0.00739944	-0.012221
BAY.61.3606.ZFPM1	8.85159e-06	0.00310153	-0.100188
Camptothecin.PAPPA2	8.88377e-06	0.00495418	0.067237
NVP.BEZ235.PZP	8.90064e-06	0.000930673	0.0533877
IPA.3.ZFPM1	9.05243e-06	0.00504824	-0.0810689
AG.014699.COL5A2	9.12264e-06	0.000600866	0.0627855
BAY.61.3606.MUC6	9.26936e-06	0.00310153	-0.0543329
BMS.754807.ATRX	9.33611e-06	0.00195241	-0.0789416
AG.014699.FSTL5	9.63202e-06	0.000600866	0.0682322
ZM.447439.DZIP3	9.69203e-06	0.00090082	-0.0997414
AG.014699.GON4L	9.90845e-06	0.000600866	0.0700348
Temsirolimus.GNAQ	9.98294e-06	0.00334029	0.132517
AG.014699.ODZ2	1.00563e-05	0.000600866	0.0679466
AZD.2281.MUC17	1.01009e-05	0.00241412	0.0279464
BIBW2992.PIK3CA	1.01077e-05	0.00364707	0.0305004
VX.702.XIRP2	1.01505e-05	0.00242597	0.0181934
Elesclomol.PCDHA10	1.04959e-05	0.0146261	0.0981538
NVP.TAE684.NRAS	1.05015e-05	0.0035138	0.0252015
ZM.447439.SLITRK4	1.08149e-05	0.000952282	-0.0921495
X17.AAG.STK11	1.08265e-05	0.00258754	-0.198342
BIBW2992.GIMAP8	1.08998e-05	0.00364707	0.0870495
NVP.BEZ235.TNR	1.09188e-05	0.00104595	0.0425504
Cisplatin.CCT8L2	1.11223e-05	0.00620252	-0.0905783
NVP.BEZ235.LRIG1	1.12535e-05	0.00104595	-0.0616118
AG.014699.XIRP2	1.12679e-05	0.000650039	0.0394013
Cytarabine.COL3A1	1.13343e-05	0.00237028	0.0120545
Erlotinib.FAM171A1	1.14319e-05	0.00149634	0.062602
Dasatinib.TPTE2	1.14476e-05	0.00478796	0.120744
Erlotinib.BRAF	1.16272e-05	0.00149634	-0.0346607
ZM.447439.NAV3	1.16913e-05	0.000977974	-0.0541222
AZD6482.FBN2	1.21351e-05	0.00126887	0.0606688
Midostaurin.HCN1	1.21975e-05	0.00340107	-0.06359
Gemcitabine.ATRX	1.22886e-05	0.00192018	-0.0839758
VX.702.KIAA1755	1.23852e-05	0.00259005	0.03559
ZM.447439.ZFHX4	1.27198e-05	0.00101335	-0.0451661
Gemcitabine.ST6GAL2	1.32219e-05	0.00192018	-0.161205
XMD8.85.GATA3	1.32848e-05	0.00555636	-0.0303472
ZM.447439.FAT1	1.33705e-05	0.00101677	-0.0495562
CHIR.99021.VHL	1.33778e-05	0.00447621	-0.0445094
NVP.BEZ235.EPHA3	1.35106e-05	0.00107799	0.0484022
FH535.LHCGR	1.35965e-05	0.00324955	-0.0558429
MG.132.BAP1	1.36014e-05	0.00595819	0.070725
Gemcitabine.IL1RAPL1	1.3773e-05	0.00192018	-0.163894
IPA.3.STAB2	1.42809e-05	0.00597299	-0.0522629
AG.014699.SPOP	1.43268e-05	0.000798433	-0.0796416
BAY.61.3606.PABPC3	1.43733e-05	0.00359389	-0.0727192
NVP.BEZ235.IMPG2	1.45538e-05	0.00107799	0.0608695
Erlotinib.KCNU1	1.46917e-05	0.00175565	0.059654
NVP.BEZ235.GPRC6A	1.46975e-05	0.00107799	0.0602669
AZD6482.GATA3	1.47472e-05	0.0014513	0.0767477
PD.0332991.CKAP5	1.47639e-05	0.00405512	0.119692
BX.795..	1.48346e-05	0.0124092	0.0794548
BAY.61.3606.MUC2	1.50372e-05	0.00359389	-0.0467003
NVP.BEZ235.CDH10	1.51627e-05	0.00107799	0.0416911
NVP.BEZ235.NAV3	1.5222e-05	0.00107799	0.0338228
NVP.BEZ235.KIAA1409	1.54642e-05	0.00107799	0.0615772
AG.014699.ZFPM1	1.54949e-05	0.000798433	0.0896668
AG.014699.ANK2	1.56111e-05	0.000798433	0.0445742
AG.014699.TPTE	1.57491e-05	0.000798433	0.0568632
MG.132.GATA3	1.57864e-05	0.00595819	0.0686366
BI.D1870.SF3B1	1.58405e-05	0.00662528	0.0438368
ZM.447439.ODZ1	1.60499e-05	0.00116746	-0.0703073
ABT.888.VHL	1.60894e-05	0.00538352	0.0199594
AZD.2281.ZFHX4	1.61215e-05	0.00337141	0.0290526
FH535.KRAS	1.61691e-05	0.00338135	-0.0312176
Dasatinib.APC	1.62638e-05	0.00500808	-0.0848039
PLX4720.ABCC3	1.63011e-05	0.00265089	-0.0801415
AZD.0530.KPRP	1.63883e-05	0.00391679	-0.0721256
Gemcitabine.CSMD3	1.63918e-05	0.0021095	-0.0643995
DMOG.GNAQ	1.64941e-05	0.00306607	-0.165515
AG.014699.SI	1.67335e-05	0.000823387	0.0443659
Thapsigargin.BAP1	1.69554e-05	0.0070916	0.157762
PD.0332991.ACTN2	1.6967e-05	0.00405512	-0.113707
Erlotinib.CARD11	1.7106e-05	0.00190789	0.051266
PAC.1.NCOR2	1.72026e-05	0.00273098	0.0711741
BIBW2992.PCDHAC2	1.73563e-05	0.00483953	0.0747984
TW.37.FLG2	1.73695e-05	0.0048432	0.0481893
AG.014699.SLITRK1	1.74875e-05	0.000835902	0.071003
PLX4720.MGAM	1.75616e-05	0.00265089	-0.054803
MG.132.TULP4	1.78069e-05	0.00595819	0.0944613
AZD7762.PBRM1	1.78446e-05	0.00497566	0.0596709
Cytarabine.FLG2	1.79062e-05	0.00332857	0.00876276
Midostaurin.A2M	1.79387e-05	0.00428735	-0.0849132
AZD6482.KRTAP5-5	1.79455e-05	0.00166793	0.105054
PAC.1.CTNNB1	1.79562e-05	0.00273098	0.0675053
Dasatinib.PODXL	1.79608e-05	0.00500808	0.131964
CI.1040.GNAQ	1.79977e-05	0.0150551	-0.0208843
ZM.447439.LTBP1	1.85914e-05	0.00129598	-0.0711592
Erlotinib.BNC2	1.86249e-05	0.00191561	0.0577827
Gemcitabine.SHPRH	1.87039e-05	0.00223511	-0.135997
FH535.SLC8A1	1.91928e-05	0.00356774	0.0450538
AG.014699.TRPS1	1.93376e-05	0.000884955	0.0628119
Erlotinib.GNAQ	1.94652e-05	0.00191561	0.0715528
AG.014699.COL19A1	1.95716e-05	0.000884955	0.0618871
X17.AAG.PCDHAC2	1.96915e-05	0.00411798	-0.162251
NVP.BEZ235.PODXL	1.98447e-05	0.00132801	-0.0643509
BAY.61.3606.KRAS	1.99229e-05	0.00416637	0.0474534
WO2009093972.CASP8	2.00785e-05	0.0111971	-0.0531512
PLX4720.GNAQ	2.01596e-05	0.00265089	0.093838
Nilotinib..	2.0408e-05	0.0113808	-0.0424217
CHIR.99021.ZFYVE26	2.05825e-05	0.00573907	0.0521507
PLX4720.MECOM	2.05986e-05	0.00265089	-0.0708911
CEP.701.PPP1R3A	2.10206e-05	0.00879186	0.0650454
DMOG.DOCK3	2.11619e-05	0.00354038	0.117811
BIBW2992.TPTE	2.15434e-05	0.00514886	0.0584708
MG.132.PBRM1	2.16304e-05	0.00603127	0.0530988
Thapsigargin.IDH1	2.19364e-05	0.00733991	-0.14366
AZD.2281.LRP6	2.21256e-05	0.0041129	0.056063
SB590885.FANCD2	2.22187e-05	0.0061953	0.0838055
Mitomycin.C.SPOP	2.23011e-05	0.00373097	0.115119
NVP.BEZ235.AHNAK2	2.23843e-05	0.00144035	0.027888
Erlotinib.ABCA12	2.24776e-05	0.00208917	0.0419286
PLX4720.ODZ2	2.25137e-05	0.00269038	-0.0674027
Elesclomol.SPOP	2.25874e-05	0.0146261	-0.101125
AG.014699.MMP16	2.27666e-05	0.000982453	0.0726551
AG.014699.TAF1L	2.29024e-05	0.000982453	0.0511164
Methotrexate.EGFR	2.3099e-05	0.00908209	-0.0515055
Obatoclax.Mesylate.OTOP1	2.33757e-05	0.0055868	0.092048
Gemcitabine.NSD1	2.38607e-05	0.00266127	-0.109371
Bleomycin.EGFR	2.40406e-05	0.0134066	0.109603
Bicalutamide.VHL	2.43633e-05	0.0162491	-0.0111054
Cytarabine.NID1	2.53515e-05	0.00419668	0.0147217
ZM.447439.PAPPA2	2.54347e-05	0.00170209	-0.0557642
NVP.BEZ235.LRRTM4	2.55622e-05	0.00151084	0.0554209
NVP.BEZ235.ZFHX4	2.5587e-05	0.00151084	0.0276003
PLX4720.BSN	2.56963e-05	0.00286599	-0.058048
BI.D1870.PCDHA10	2.5801e-05	0.00863302	0.049549
Temsirolimus.CTNNB1	2.58519e-05	0.00720836	0.0833055
AZD.0530.ADAMTS18	2.5931e-05	0.00542282	-0.055597
NVP.BEZ235.CNTNAP2	2.61891e-05	0.00151084	0.0395124
Elesclomol.EPHA6	2.62273e-05	0.0146261	0.0850291
Cisplatin.COL17A1	2.62388e-05	0.0103842	-0.0864174
DMOG.RB1	2.6582e-05	0.00404288	-0.0984606
ZM.447439.ZNF804A	2.68493e-05	0.00170847	-0.0642557
Erlotinib.PAPPA2	2.68774e-05	0.00236662	0.037038
AG.014699.FNDC1	2.70311e-05	0.00110806	0.0634958
Methotrexate.PCNT	2.71431e-05	0.00908209	-0.0551495
BMS.536924.HTT	2.72269e-05	0.00759176	-0.0656666
ZM.447439.DNAH11	2.75724e-05	0.00170847	-0.0513734
AG.014699.SFMBT2	2.75754e-05	0.00110806	0.0760723
Cytarabine.PCDH18	2.75932e-05	0.00419668	0.0119017
AG.014699.EVC2	2.78174e-05	0.00110806	0.0709348
Gefitinib.NBAS	2.79063e-05	0.00933745	-0.0706862
WH.4.023.FRG1	2.84853e-05	0.00953117	0.106998
Obatoclax.Mesylate.GNAQ	2.86609e-05	0.00599371	-0.109332
Nutlin.3a.NRAS	2.89908e-05	0.00497387	0.129311
Bicalutamide.GTF2I	2.91377e-05	0.0162491	0.0157412
Gemcitabine.KIAA1409	2.93697e-05	0.00293666	-0.157155
Docetaxel.MUC12	2.94471e-05	0.0111626	0.0538351
BMS.754807.FLG2	2.96786e-05	0.00551692	0.0840785
Nutlin.3a.THSD7B	2.97302e-05	0.00497387	0.0877152
Sunitinib.CDH1	3.02196e-05	0.00722248	0.0523901
Gemcitabine.PSG8	3.06725e-05	0.00293666	-0.15384
AG.014699.PKD1L1	3.08322e-05	0.00119959	0.0525266
WZ.1.84.TTC40	3.14129e-05	0.00656922	-0.0718944
Gemcitabine.OTOP1	3.15959e-05	0.00293666	-0.146194
NVP.BEZ235.LTBP1	3.1828e-05	0.00177494	0.0438313
ZM.447439.PCDHGA1	3.191e-05	0.00190662	-0.0855403
DMOG.SSFA2	3.25155e-05	0.00453321	0.146161
RDEA119.C7	3.25272e-05	0.0136045	-0.106665
Lapatinib.ASXL3	3.28707e-05	0.00785609	0.0418775
SB590885.KRAS	3.30181e-05	0.00734994	0.0439217
AG.014699.KCNA4	3.3122e-05	0.00123413	0.0727043
AG.014699.DCAF4L2	3.31953e-05	0.00123413	0.0693049
AZ628.CADPS	3.32731e-05	0.00618509	0.116275
XMD8.85.GTF2I	3.41514e-05	0.0114271	0.0365694
NVP.BEZ235.PRDM9	3.46994e-05	0.00183702	0.0390987
AZD6482.TP53	3.48004e-05	0.00306427	-0.0274176
SB590885.MECOM	3.51462e-05	0.00734994	-0.0684335
ZM.447439.PPFIA1	3.53161e-05	0.00203737	-0.0930976
BAY.61.3606..	3.53863e-05	0.00657792	0.0831295
AICAR.PCDHB7	3.56884e-05	0.0138786	-0.0828668
AZD.0530.LTBP1	3.58387e-05	0.00666202	-0.0520105
TW.37.CIC	3.60703e-05	0.00862081	0.0593517
NVP.BEZ235.ZNF578	3.6376e-05	0.00183702	0.0610857
Cisplatin.IDH1	3.64878e-05	0.0103842	0.0612113
AG.014699.NRXN3	3.65834e-05	0.00131074	0.0625678
Erlotinib.FLG	3.68734e-05	0.00308446	0.0245928
CHIR.99021.CDH10	3.74147e-05	0.00894212	0.043144
AG.014699.ZNF638	3.747e-05	0.00131074	0.0696242
AG.014699.SMARCA2	3.76065e-05	0.00131074	0.0684389
AZ628.ZFPM1	3.80015e-05	0.00635765	-0.147712
ZM.447439.OR5I1	3.81829e-05	0.00212933	-0.0933982
NVP.BEZ235.C7	3.82106e-05	0.00183702	0.0513719
X681640.MYO16	3.8266e-05	0.0160047	-0.0727899
NVP.BEZ235.FAM75A6	3.83682e-05	0.00183702	0.0606706
NVP.BEZ235.THOC2	3.84315e-05	0.00183702	0.0547454
ABT.263.ITGA8	3.88822e-05	0.0162625	0.0926438
Nilotinib.STON1-GTF2A1L	3.91312e-05	0.0163666	-0.0422736
CEP.701.FRG1B	3.92133e-05	0.0131208	0.068667
Bicalutamide.ARID1A	3.93707e-05	0.0164668	-0.00866975
Bosutinib.FRG1B	3.94098e-05	0.0219775	0.0114772
ATRA.KCNQ5	3.96685e-05	0.0221218	0.0531682
Cisplatin.AHNAK2	4.01243e-05	0.0103842	-0.0401356
Lapatinib.CACNA1B	4.02967e-05	0.00842705	0.0510262
Vorinostat.BAP1	4.08331e-05	0.0227713	0.0387186
Gemcitabine.BMS1	4.11952e-05	0.00362735	-0.151323
WZ.1.84.DNMT3A	4.11995e-05	0.00765852	-0.0674136
VX.702.SIGLEC1	4.1213e-05	0.00766104	0.0330996
AICAR.CDH1	4.1478e-05	0.0138786	-0.0700711
BMS.754807.PTEN	4.17111e-05	0.00697826	0.078018
NVP.BEZ235.FLG	4.18275e-05	0.00193285	0.0232062
BMS.536924.TRPC5	4.21805e-05	0.0100811	-0.0851854
IPA.3.MUC4	4.2559e-05	0.012057	0.0263835
Docetaxel.SYNE2	4.26797e-05	0.0111626	0.0363703
AG.014699.QSER1	4.28057e-05	0.00145887	0.071721
Cisplatin.SNCAIP	4.34487e-05	0.0103842	-0.0903417
NVP.BEZ235.DOCK2	4.35705e-05	0.00193285	0.0377174
AG.014699.LRRTM4	4.36005e-05	0.00145887	0.071491
Methotrexate.TP53	4.37477e-05	0.0121983	0.0217045
AZD.0530.GRIA4	4.37683e-05	0.00732243	-0.0630177
NVP.BEZ235.GRM8	4.39021e-05	0.00193285	0.0452654
ZM.447439.BAP1	4.39611e-05	0.00237248	0.0703163
Dasatinib.ZFPM1	4.42406e-05	0.0105735	0.130794
AZD6482.QRICH2	4.44399e-05	0.00371739	0.0874669
Vinblastine.ODZ3	4.47024e-05	0.0233612	-0.0873978
Erlotinib.Unknown	4.50296e-05	0.00355606	0.0330364
PD.0325901.BRAF	4.5108e-05	0.0126229	-0.0595285
AG.014699.SALL1	4.51545e-05	0.00148125	0.0578881
NVP.BEZ235.DYSF	4.51961e-05	0.0019388	0.0428691
BI.D1870.FLJ46321	4.51987e-05	0.0109074	0.053543
BIBW2992.KEAP1	4.52132e-05	0.0094552	0.0614768
PD.0325901.KIAA1210	4.52703e-05	0.0126229	-0.0910988
BI.D1870.SLCO1B1	4.56378e-05	0.0109074	0.051246
VX.702.NF1	4.62373e-05	0.00773549	0.0192174
AG.014699.FAT4	4.69516e-05	0.00151058	0.0384707
IPA.3.SPOP	4.70442e-05	0.012057	-0.0656982
CHIR.99021.KCNJ12	4.80194e-05	0.0100421	0.0603844
Lapatinib.KCNU1	4.83563e-05	0.00895477	0.0596355
Erlotinib.ADAMTS18	4.84901e-05	0.00355606	0.0472929
PAC.1.SMAD4	4.85061e-05	0.00646317	-0.0701586
ZM.447439.ADAMTS19	4.85164e-05	0.0025365	-0.0694082
Docetaxel.BAP1	4.85262e-05	0.0111626	-0.053424
WO2009093972.PDGFRB	4.8617e-05	0.020334	-0.0521862
Erlotinib.SNCAIP	4.88879e-05	0.00355606	0.0634199
PAC.1.MUC5B	5.02219e-05	0.00646317	0.0395797
IPA.3.CUBN	5.04475e-05	0.012057	-0.0369875
ZM.447439.CCDC39	5.04497e-05	0.00255765	-0.0905418
AG.014699.GRM1	5.04782e-05	0.0015934	0.0559268
AZD6482..	5.06969e-05	0.00403885	-0.0941875
AZD.2281.FAM171B	5.09236e-05	0.00851952	0.0615216
AZ628.MT-CO1	5.10661e-05	0.00776668	-0.132328
AZD.0530.SETBP1	5.22957e-05	0.00795371	-0.0517367
Docetaxel.OBSCN	5.23453e-05	0.0111626	0.0307067
ABT.888.BAP1	5.26588e-05	0.014683	0.0216271
Bortezomib.DNAH1	5.27855e-05	0.017662	-0.0651157
PD.0332991.KMT2D	5.32847e-05	0.0111432	0.0971597
Thapsigargin.DOCK5	5.33758e-05	0.014883	-0.178534
Docetaxel.STAG2	5.33776e-05	0.0111626	0.0564261
Lapatinib..	5.35252e-05	0.00895477	-0.0629766
PLX4720.POTEF	5.35321e-05	0.00559745	-0.0711809
BIBW2992.KIF4A	5.46101e-05	0.0101514	-0.0750698
PD.173074.PLEKHA5	5.49196e-05	0.0229701	-0.0453178
Erlotinib.TLR4	5.5051e-05	0.00377634	0.0488669
Vinblastine.CARD11	5.58545e-05	0.0233612	0.074776
AG.014699.MUC5B	5.62635e-05	0.00174313	0.0351191
ABT.263.MGAM	5.62881e-05	0.018834	0.0715784
Erlotinib.RELN	5.64307e-05	0.00377634	0.032912
AZD6244.SHANK2	5.71183e-05	0.0290346	-0.070263
NVP.BEZ235.SLITRK4	5.7135e-05	0.00238967	0.0533954
Cytarabine.PCDHGC5	5.73056e-05	0.00798935	0.0133728
AZD.0530.AKAP6	5.73575e-05	0.00799659	-0.0482629
PLX4720.HEATR7B2	5.78275e-05	0.0056909	-0.0589487
AG.014699.MYOF	5.81918e-05	0.00177009	0.0683498
ZM.447439.EPHA5	5.91329e-05	0.00285787	-0.0681229
BI.D1870.FBXW7	5.93072e-05	0.0124026	-0.0356596
ZM.447439.NF1	6.04965e-05	0.00285787	-0.0489603
Temsirolimus.SZT2	6.08883e-05	0.0130617	-0.110316
Camptothecin.BBS9	6.10429e-05	0.0209237	0.103065
FH535.ATRX	6.11886e-05	0.0102368	-0.0273289
NVP.BEZ235.BRWD3	6.13968e-05	0.00250529	0.042614
ZM.447439.CPS1	6.14963e-05	0.00285787	-0.0641141
Erlotinib.PCDHA10	6.15466e-05	0.00396029	0.0544102
Lapatinib.ATM	6.1668e-05	0.00937914	0.037428
BIBW2992.MUC5B	6.21349e-05	0.0103952	0.0364273
AZD.2281.NFE2L2	6.23165e-05	0.00947777	0.0445508
Temsirolimus.CDH20	6.2459e-05	0.0130617	-0.108986
PAC.1.DNMBP	6.24898e-05	0.00746753	-0.087164
Camptothecin.MUC12	6.25336e-05	0.0209237	-0.0768511
AZD7762.MON2	6.30471e-05	0.0150683	-0.0969836
VX.702.VHL	6.31536e-05	0.00960509	-0.0228944
FTI.277.MN1	6.33598e-05	0.0212002	-0.0327891
CHIR.99021.SMAD4	6.40365e-05	0.0119037	0.0504845
AZ628.NFE2L2	6.4122e-05	0.00893968	-0.0996369
Thapsigargin.OR2T33	6.5752e-05	0.0149116	0.187796
X681640.PIK3C2B	6.62954e-05	0.0168363	-0.0869679
Erlotinib.CELSR3	6.69437e-05	0.00414803	0.0442367
ZM.447439.IL1RAPL1	6.70469e-05	0.00303161	-0.0900287
NVP.BEZ235.PTPRD	6.71397e-05	0.00263003	0.0355214
X681640.COL4A3	6.73902e-05	0.0168363	-0.096296
AZD.0530.CARD11	6.75405e-05	0.00869194	-0.0540044
CGP.082996.MACF1	6.7608e-05	0.0226216	-0.0332091
NVP.BEZ235.GRIA4	6.88815e-05	0.00263003	0.0513557
Gefitinib.IVL	6.89079e-05	0.0170461	-0.0909946
Mitomycin.C.BRAF	6.9099e-05	0.0105093	-0.0594263
NVP.BEZ235.CNTNAP5	6.91701e-05	0.00263003	0.0368985
BMS.536924.FRG1	6.92972e-05	0.0144918	-0.084057
Lapatinib.A2M	6.93863e-05	0.00967361	0.0599722
AZD6244.CNTN4	6.94192e-05	0.0290346	-0.0762904
NVP.BEZ235.ASTN2	7.10678e-05	0.00264214	0.0436405
AICAR.TMTC1	7.11347e-05	0.0198347	-0.102196
Thapsigargin.NRAS	7.13045e-05	0.0149116	-0.174726
Gefitinib.NUP210	7.13226e-05	0.0170461	-0.0863699
Nilotinib.FSIP2	7.14759e-05	0.0239158	-0.0354412
BIBW2992.HCN1	7.15745e-05	0.0105271	0.0544601
Cytarabine.MET	7.3415e-05	0.00802321	0.0122758
Erlotinib.ZFHX4	7.37954e-05	0.00440928	0.0273326
SB590885.TVP23C	7.39959e-05	0.0126317	0.0701713
ABT.263.USP24	7.41785e-05	0.0206834	0.10211
AZD.0530.ARHGEF11	7.42164e-05	0.00886886	-0.0644001
WH.4.023.ZBBX	7.44105e-05	0.0207481	-0.0836974
Lapatinib.LRP2	7.52197e-05	0.0096802	0.0307872
Cytarabine.TCHHL1	7.53516e-05	0.00802321	0.0138737
SB590885.RAPGEF6	7.55031e-05	0.0126317	-0.0723715
BIBW2992.TDRD6	7.55085e-05	0.0105271	0.0615014
Cytarabine.SLC8A1	7.64659e-05	0.00802321	0.011099
Erlotinib.TRPC6	7.65547e-05	0.00441642	0.0576387
Cytarabine.SCAPER	7.67313e-05	0.00802321	0.013964
AG.014699.BCLAF1	7.76322e-05	0.00231926	0.0580622
Dasatinib.RYR3	7.76455e-05	0.0162376	-0.0569926
Sunitinib.PLEKHA5	7.77388e-05	0.0162571	0.0726273
Axitinib..	7.81592e-05	0.0326901	-0.0717065
BI.D1870.ZFPM1	7.821e-05	0.0145384	-0.0563082
FH535.FLJ46321	7.8756e-05	0.0110587	0.0529228
FH535.DSG4	7.93214e-05	0.0110587	-0.050727
X681640.CSMD2	7.93809e-05	0.0168363	-0.0514435
Obatoclax.Mesylate.FHOD3	7.97565e-05	0.0142493	0.0829083
Erlotinib.PCDH17	8.01526e-05	0.00446984	0.0467464
Bicalutamide..	8.03399e-05	0.0268817	0.0153707
X681640.SPINK5	8.05083e-05	0.0168363	-0.0946807
PAC.1.IDH1	8.1024e-05	0.00903687	0.0587311
AZD7762.ARHGEF15	8.11209e-05	0.0169644	0.0965902
Cisplatin.ADAM21	8.22673e-05	0.0165949	-0.0859903
Mitomycin.C.MED23	8.26866e-05	0.0115279	0.112063
AZD.2281.MYPN	8.35467e-05	0.0106432	0.0524587
DMOG.STON1-GTF2A1L	8.37412e-05	0.0107769	0.136631
Gemcitabine.OR4Q3	8.39619e-05	0.00702341	-0.151419
VX.702.LRRC16B	8.42524e-05	0.0117462	0.0350965
PD.0332991.KEAP1	8.51243e-05	0.0158237	-0.0845153
Obatoclax.Mesylate.ZNF407	8.51724e-05	0.0142493	-0.0750462
IPA.3.CTNND2	8.60415e-05	0.0170718	-0.04566
Temsirolimus.RASA1	8.60704e-05	0.0159995	-0.102262
Bosutinib.EGFR	8.61562e-05	0.0339102	0.00893031
NVP.BEZ235.LRRC66	8.63665e-05	0.00314111	0.0524122
Erlotinib.KCNT1	8.68966e-05	0.00457434	0.0573104
TW.37.CDH18	8.69017e-05	0.0181733	0.0603699
PLX4720.COL4A3	8.69293e-05	0.0080796	-0.0769716
RDEA119.ADAM21	8.69666e-05	0.029099	-0.118503
ZM.447439.KIAA1109	8.8043e-05	0.00387621	-0.0522619
SB590885.PCDHGC5	8.84698e-05	0.0134554	-0.0716692
AZD6482.BAP1	8.9613e-05	0.00681466	-0.0708766
BX.795.MXRA5	8.96925e-05	0.0500185	-0.0444272
Erlotinib.A2M	8.97855e-05	0.00457434	0.0553895
NVP.BEZ235.ODZ4	9.08288e-05	0.00323312	0.0484375
IPA.3.GALNT13	9.18388e-05	0.0170718	-0.0622393
Bortezomib.GATA3	9.37431e-05	0.0261387	0.0674323
AG.014699.SVEP1	9.37667e-05	0.00275213	0.0439789
NVP.BEZ235.CTNNA2	9.38496e-05	0.00327105	0.0390959
MG.132.CDH1	9.40279e-05	0.0224727	-0.0563914
Methotrexate.TTC40	9.41309e-05	0.0224973	-0.0740378
Cisplatin.ITSN2	9.45929e-05	0.0165949	-0.0769347
Erlotinib.PIK3CA	9.49091e-05	0.00457434	0.0204326
ZM.447439.GPRASP1	9.52387e-05	0.0040855	-0.0847771
Erlotinib.APOB	9.52742e-05	0.00457434	0.0269525
AZ628.PCDHA3	9.54403e-05	0.0122824	0.109377
Erlotinib..	9.56975e-05	0.00457434	-0.0570581
AG.014699.MTMR8	9.59006e-05	0.00276624	0.073884
AZD.2281.PRX	9.59842e-05	0.0106432	0.0576268
SB590885.RP1L1	9.67994e-05	0.0134954	-0.0452907
BMS.754807.PAK7	9.73675e-05	0.0148087	0.131565
AZD7762.STK11	9.7517e-05	0.0181273	0.09656
DMOG.APC	9.75898e-05	0.0114423	0.0903996
AZD.2281.CD163	9.82355e-05	0.0106432	0.044514
AZD.2281.RP1	9.83841e-05	0.0106432	0.0320603
AG.014699.ADAMTS20	9.85198e-05	0.00279362	0.0464669
Cisplatin.NF1	9.91927e-05	0.0165949	-0.0447529
Nutlin.3a.MT-CO1	9.96714e-05	0.0151591	0.130963
XMD8.85.MUC4	9.9824e-05	0.0255202	-0.0140203
NVP.BEZ235.COL9A1	0.000101121	0.00345256	0.050986
X17.AAG.ZZEF1	0.000101277	0.0188262	-0.132761
Bosutinib.ERCC6	0.000101346	0.0339102	0.0130509
WZ.1.84.ZNF469	0.000101522	0.0169847	-0.0620879
Gemcitabine.TCHH	0.000102439	0.008161	-0.0928267
DMOG.C10orf12	0.000102591	0.0114423	0.136558
BIBW2992.ATRX	0.000102981	0.0132529	0.0393875
AZD.2281.HTT	0.000103088	0.0106432	0.0429283
CEP.701.BRAF	0.00010478	0.029216	-0.0443246
Camptothecin.Unknown	0.000104971	0.0287734	0.0538855
NVP.BEZ235.PEG3	0.000105732	0.0035378	0.034107
ZM.447439.ZNF536	0.000105766	0.00442365	-0.0500362
PD.173074.USP31	0.000106337	0.0273254	-0.0432706
CI.1040.BRAF	0.00010663	0.0433037	-0.00895651
XMD8.85.PCDHAC2	0.000106779	0.0255202	0.0316235
RDEA119.ITGA8	0.000107932	0.030095	-0.094019
Erlotinib.TMTC1	0.000108431	0.00503905	0.0594356
Bortezomib.TNRC6B	0.00011022	0.0263427	-0.080094
AZD.2281.SLIT3	0.000110404	0.0106432	0.0487415
X681640.RB1	0.000110494	0.0185333	-0.0634553
X681640.AR	0.000110779	0.0185333	-0.0914813
SB590885.DBC1	0.000111283	0.0143213	-0.0782191
PD.173074.IDH1	0.00011354	0.0273254	-0.0305612
Thapsigargin.FAM71B	0.000114168	0.0212225	-0.164861
PD.173074.SMAD4	0.000114332	0.0273254	-0.0354671
ZM.447439.C15orf2	0.000115097	0.0046039	-0.070456
AZD6482.POTEH	0.00011537	0.00811735	0.0945547
ZM.447439.LRFN2	0.000115579	0.0046039	-0.0830959
Midostaurin.IGDCC4	0.000115811	0.024219	-0.0830095
ABT.263.ATRX	0.000115824	0.027682	0.0538144
AG.014699.ZFHX4	0.000116337	0.00324387	0.0335399
AZD6482.NELL1	0.000116447	0.00811735	0.0803223
Erlotinib.COL11A1	0.000116526	0.00526885	0.0318959
Axitinib.RICTOR	0.000116874	0.0360704	-0.0693255
NVP.BEZ235.ZNF804A	0.000117456	0.00385301	0.037388
BMS.536924.PCDHGC5	0.000118964	0.0221141	-0.0754709
CGP.082996.SPOP	0.000119117	0.0325618	0.062549
AZD.2281.PCDHAC2	0.000119336	0.0106432	0.0495461
Erlotinib.PCDHB6	0.000119709	0.00527036	0.0477374
AZD.2281.ABCA13	0.000120873	0.0106432	0.0280105
PD.0332991.FLJ46321	0.000121025	0.0202474	-0.109125
Cytarabine.CD163L1	0.000121036	0.0119114	0.0108065
PLX4720.DBC1	0.000121112	0.0106642	-0.0783076
AG.014699.CSMD3	0.000121469	0.00333145	0.0289347
ZM.447439.LAMA4	0.000122786	0.00477724	-0.0673211
Sunitinib.MYH15	0.000122966	0.0207099	0.0510942
AZ628.DNAH9	0.000123312	0.0147357	0.0652277
Sunitinib.KMT2C	0.000123789	0.0207099	0.0662003
AG.014699.CDH12	0.00012488	0.00336973	0.0530494
Gemcitabine.FAM75A6	0.000124975	0.00950375	-0.149184
X681640.MYH15	0.000125452	0.0190801	-0.0667351
Cisplatin.PTPRC	0.000125527	0.0190915	-0.0662676
Erlotinib.LRP2	0.000127437	0.00546671	0.0279512
Obatoclax.Mesylate.TVP23C	0.000127613	0.0194087	0.0812681
Axitinib.SLIT2	0.000129362	0.0360704	-0.0519011
ZM.447439.SORCS1	0.000129441	0.00484236	-0.0624386
Camptothecin.STK11	0.000129782	0.0287734	0.103317
Bortezomib.BAP1	0.000130253	0.0272391	0.0675464
BI.D1870.KIT	0.000130274	0.0217949	-0.0411697
AZD6482.STAB2	0.000130392	0.00872584	0.0654865
RDEA119.XIRP1	0.000130658	0.0312272	0.101751
Erlotinib.GCC2	0.00013102	0.00547991	0.0492807
CI.1040.PBRM1	0.000131253	0.0433037	-0.0097691
AG.014699.UMODL1	0.000131834	0.00343279	0.0682552
Gemcitabine.ODZ2	0.000132255	0.00962008	-0.116784
NVP.BEZ235.CLIP1	0.000132372	0.00425881	0.052056
ZM.447439.CDH9	0.000132653	0.00484236	-0.0584623
ZM.447439.ARFGEF1	0.000133143	0.00484236	-0.0756026
Midostaurin.TPTE	0.000133177	0.0247562	-0.0557639
PLX4720.KALRN	0.000134523	0.0109485	-0.049036
AG.014699.FHOD3	0.000134569	0.00343279	0.0653271
AG.014699.ABCB1	0.000134665	0.00343279	0.0555669
AG.014699.PCDH15	0.000135424	0.00343279	0.0382983
CGP.082996.CDH1	0.000136242	0.0325618	0.0435816
Methotrexate.STK11	0.00013669	0.0285854	0.0760111
PD.0325901.KDM5A	0.000137114	0.0296156	-0.101762
Erlotinib.OR4Q3	0.000137226	0.00559951	0.0585427
Camptothecin.RP1L1	0.00013759	0.0287734	0.0586384
AG.014699.PLCB1	0.00013793	0.00344413	0.0539917
Nutlin.3a.ATRX	0.000138107	0.0192544	0.0661564
PLX4720.CDH23	0.000138127	0.0109485	-0.0527255
BIBW2992.PIKFYVE	0.000138838	0.0160115	0.0622286
X17.AAG.PCDHGC5	0.000138866	0.0202909	-0.155342
X17.AAG.TLL1	0.000139673	0.0202909	-0.154877
NVP.BEZ235.RP1L1	0.000141335	0.0044614	0.0324122
Lapatinib.CSMD3	0.000141375	0.0168943	0.0241995
PD.0325901.SEMA5B	0.000141617	0.0296156	-0.0950556
AZD.2281.C1orf173	0.000141983	0.0114379	0.0335515
CI.1040.DUSP27	0.000142012	0.0433037	0.0139413
Gemcitabine.SI	0.000142153	0.00990922	-0.0778605
ZM.447439.SPTA1	0.000142246	0.00493384	-0.0396156
MG.132.NFE2L2	0.000142879	0.0273784	-0.0612324
AG.014699.HCN1	0.000142887	0.00351545	0.0499094
PAC.1.RELN	0.000143224	0.0149759	0.0439747
ZM.447439.LRRTM4	0.00014352	0.00493384	-0.0790276
BIBW2992.RREB1	0.000143558	0.0160115	0.0653555
AZD.2281.CPAMD8	0.000143572	0.0114379	0.0441312
PLX4720.FAM135B	0.000143973	0.0109485	-0.042744
Bosutinib.MUC4	0.000145178	0.0404804	-0.00527236
AZD6482.SYNE1	0.000145516	0.00936342	0.0370284
X17.AAG.KMT2C	0.000145541	0.0202909	-0.153816
ZM.447439.ABCA6	0.000145678	0.00493384	-0.0783351
AZ628.XRN1	0.000145777	0.0153519	0.12149
Cisplatin.PBRM1	0.000146101	0.0203689	-0.0474295
AZD6244.KIAA1210	0.000146798	0.0383327	-0.0647684
AZ628.EFCAB5	0.000146821	0.0153519	0.126297
AG.014699.TNR	0.000146934	0.00354623	0.0488487
MG.132.CASP8	0.000147284	0.0273784	0.0767266
ZM.447439.SLCO5A1	0.000147455	0.00493384	-0.0845823
WZ.1.84.OTOGL	0.000148011	0.0225111	-0.0643009
FTI.277.DOCK11	0.000148337	0.0413613	0.0247189
AZD.0530.BNC2	0.000149328	0.016655	-0.0581383
AG.014699.COL5A1	0.000149959	0.00354623	0.0538416
BAY.61.3606.GPRC6A	0.000150345	0.0230738	0.075692
AG.014699.XIRP1	0.000150497	0.00354623	0.0651678
BAY.61.3606.SF3B1	0.000151711	0.0230738	0.0604733
PD.0332991.HEPHL1	0.000151846	0.0202819	0.100388
Temsirolimus.MST1	0.000153867	0.0235688	-0.0993985
CI.1040.GOLGB1	0.000155303	0.0433037	-0.0120378
AG.014699.NAV3	0.000155392	0.003603	0.0392749
PD.0332991.NLRC5	0.000155508	0.0202819	0.0857586
CHIR.99021.ZFHX4	0.0001558	0.0257507	0.026955
Gemcitabine.EGFR	0.000156262	0.0100757	-0.090585
Gemcitabine.OR2T4	0.000156585	0.0100757	-0.130854
XMD8.85.HRAS	0.000157169	0.0328679	0.0304421
AG.014699.ACACB	0.000157214	0.003603	0.0562406
ZM.447439.RYR1	0.000157365	0.0051622	-0.0422644
RDEA119.NFE2L2	0.000158257	0.0330955	0.0840511
SB590885.CRIPAK	0.00015865	0.0189587	0.0696666
Dasatinib.ZNF521	0.000159614	0.0296705	-0.0814099
WH.4.023.PDE11A	0.000161468	0.0385908	0.0924809
AZD6244.KDM5A	0.000161548	0.0383327	-0.0768943
Bortezomib.ZNF257	0.000161899	0.0288045	-0.0904325
AZD.2281.TNKS1BP1	0.00016428	0.011997	0.0490255
PD.173074.Unknown	0.000164701	0.0344432	0.0229393
BMS.536924.PCDHAC2	0.000164805	0.0250539	-0.0689431
NVP.BEZ235.FAT2	0.000165604	0.0051221	0.0309357
ABT.888.EPHB6	0.000166125	0.0397039	0.0247188
Temsirolimus.HECTD1	0.000166264	0.0235688	0.0906241
ZM.447439.ANK2	0.000166703	0.00536336	-0.0462462
AG.014699.PCDH11X	0.000166805	0.00375476	0.0450541
X681640.ERC2	0.000167916	0.0222178	-0.0933352
PD.0332991.MCF2L2	0.000167939	0.0202819	0.0973685
AG.014699.KALRN	0.000168325	0.00375476	0.046784
Vorinostat.GATA3	0.00016846	0.0704584	-0.0348857
AZD6244.EGFR	0.000168729	0.0383327	-0.0500629
CHIR.99021.NLRP14	0.000169312	0.0257507	0.0525711
PD.0332991.KRAS	0.000169723	0.0202819	-0.0574698
NVP.BEZ235.HECW1	0.00016995	0.0051221	0.0401844
AG.014699.MAP1B	0.000171329	0.0037715	0.0556692
VX.702.PKD1	0.00017141	0.0220592	0.024023
NVP.BEZ235.ZNF560	0.000171451	0.0051221	0.0540404
BI.D1870.PPP1R3A	0.000171629	0.0261033	-0.0347305
AZD.2281.MYH1	0.000171974	0.011997	0.0361964
AZD.2281.ELTD1	0.000172103	0.011997	0.0474754
Bortezomib.BOD1L1	0.000172173	0.0288045	-0.0810998
ABT.263.BAP1	0.000172502	0.0360746	-0.0782494
BIBW2992.DISP1	0.00017357	0.0181489	0.0734196
IPA.3.KRTAP5-5	0.00017622	0.028879	-0.0646954
ZM.447439.TTN	0.000176433	0.00556931	-0.0216571
PAC.1.SMARCA4	0.000176933	0.0171569	0.0528235
X681640.LAMA5	0.000177386	0.0222178	-0.0627596
Cytarabine.COL6A5	0.000178008	0.0165449	0.0105706
AG.014699.ZP4	0.000178312	0.00381996	0.0692046
BMS.536924.TRPC7	0.00017926	0.0250539	-0.0792282
AG.014699.FAM135B	0.000179688	0.00381996	0.0407999
Docetaxel.MET	0.000179864	0.0334347	0.0568113
Temsirolimus.PCLO	0.00017989	0.0235688	-0.0431641
Erlotinib.ASXL3	0.000179937	0.0071675	0.0354412
AG.014699.C10orf12	0.000180381	0.00381996	0.0728541
Elesclomol.CYLC1	0.000180408	0.0685898	0.0926181
Bicalutamide.SLC6A3	0.000181602	0.0443626	-0.0152771
AG.014699.LRP1B	0.000183248	0.00383218	0.0288947
AZD6244.NFE2L2	0.0001833	0.0383327	0.0593797
PAC.1.SSPO	0.000184593	0.0171569	0.0574263
Erlotinib.ABCA13	0.000185147	0.00720351	0.0278582
AZD6482.STK11	0.000185552	0.0113358	0.0925218
Bicalutamide.USP26	0.000185618	0.0443626	-0.015281
DMOG.ABCA6	0.000185754	0.0194229	0.117359
X17.AAG.BAP1	0.000185764	0.0239064	0.123774
X681640.ABCC11	0.000185923	0.0222178	-0.0886637
Mitomycin.C.PRB2	0.00018664	0.0229512	-0.101056
ZM.447439.SLCO1C1	0.000187118	0.00579719	-0.0803291
Temsirolimus.NCOA2	0.000188512	0.0235688	-0.0978689
WZ.1.84.SF3B1	0.000188786	0.0237268	-0.050662
CEP.701.FBXW7	0.000189076	0.0445726	0.0548093
BMS.536924.TGFBR2	0.00018929	0.0250539	-0.0757486
AZD6482.SALL3	0.00018972	0.0113358	0.0716822
AG.014699.ATP10D	0.000189744	0.00391904	0.0604752
IPA.3.GRIK3	0.00018988	0.028879	-0.0560212
AZD.0530.COL12A1	0.000190296	0.018934	-0.0430115
Methotrexate.SFMBT2	0.000191341	0.0355682	-0.0681793
AZD.0530.KCNU1	0.000192396	0.018934	-0.0583199
Mitomycin.C.NLRP5	0.000193666	0.0229512	-0.0824679
VX.702.DLGAP2	0.00019408	0.0231925	0.0304971
AZD.2281.ROBO4	0.000194143	0.0129921	0.0556538
Thapsigargin.MUC4	0.000194266	0.0304092	0.0693595
PD.173074.ENAM	0.000195056	0.0362587	-0.0423637
Tipifarnib.SNTG1	0.000195241	0.108879	0.0582084
WZ.1.84.TIAM2	0.000195882	0.0237268	-0.056691
BI.D1870.IDH1	0.000196965	0.0274602	0.0340465
Camptothecin.FLJ46321	0.000197021	0.036624	0.0966643
CI.1040.GPRC6A	0.000198772	0.0475065	0.015794
Bortezomib.CDHR2	0.000199064	0.0289394	-0.0795878
Bleomycin.DENND5B	0.000199717	0.0748656	-0.147441
BMS.536924.CASR	0.00020046	0.0250539	-0.0685313
TW.37.ABCA2	0.00020135	0.0374287	-0.0692637
ZM.447439.CSPP1	0.000201862	0.00614027	-0.0781499
Sunitinib.ABCA7	0.000202403	0.0307837	0.0616344
Erlotinib.ATRX	0.00020268	0.00770646	0.028551
BIBW2992.HYDIN	0.000203743	0.0200507	0.0416683
AZD.2281.HEATR7B2	0.000203973	0.0131249	0.0408134
AZD6482.CELSR2	0.000204417	0.0117927	0.0626228
Gemcitabine.HRAS	0.000204717	0.0125787	0.120767
X681640.CDH1	0.000204805	0.0228426	0.0609844
PD.0332991.DSPP	0.000205309	0.0228988	-0.0899308
Mitomycin.C.CNOT1	0.000205779	0.0229512	0.0762108
Thapsigargin.NFE2L2	0.000205839	0.0304092	-0.135455
AG.014699.LRP1	0.00020745	0.00423249	0.041402
Bortezomib.NFE2L2	0.000207575	0.0289394	-0.0648474
DMOG.LHCGR	0.000207727	0.0202647	0.122804
ABT.263.LPPR4	0.000209129	0.0382611	0.0984642
AZD6244.APC	0.000209623	0.0389665	0.0526211
CHIR.99021.TET2	0.000209918	0.027598	-0.0514218
WZ.1.84.THEMIS	0.00021139	0.0237268	-0.0643466
BMS.536924.ERBB4	0.000212561	0.0250539	-0.0548197
WZ.1.84.FAM83B	0.000212732	0.0237268	-0.0578102
Midostaurin.KCNH7	0.000213018	0.0334717	-0.0621333
Docetaxel.ATRX	0.000213569	0.0357302	0.0326995
ZM.447439.USP29	0.000214243	0.00630878	-0.0701397
CHIR.99021.EGFR	0.00021445	0.027598	0.0365957
CGP.082996.SETD5	0.000214897	0.0373801	-0.06364
ZM.447439.APOB	0.000214943	0.00630878	-0.0383433
Cytarabine.PCDHB8	0.000214983	0.0189298	0.0113966
Erlotinib.KCNA5	0.000216698	0.00805635	0.0555679
Gemcitabine.ASXL3	0.000217716	0.0125787	-0.0877081
Temsirolimus.KIAA1409	0.000217991	0.0235688	0.0987311
DMOG.OTOGL	0.000218031	0.0202647	0.123325
Gemcitabine.MLL3	0.000218041	0.0125787	-0.0636076
Thapsigargin.ARID2	0.000218118	0.0304092	-0.135626
X681640.ADAM2	0.000218714	0.0228693	-0.0854209
CGP.082996.MLL	0.000218989	0.0373801	-0.0481086
BMS.754807.DCHS2	0.000219249	0.030567	0.0768274
Midostaurin.WNK2	0.000220077	0.0334717	-0.0760775
Lapatinib.ABCA12	0.000221147	0.0246653	0.0389534
PD.173074.ABCC2	0.000223023	0.0373118	-0.0415865
Bosutinib.GREB1	0.000223275	0.0533627	-0.0106564
ZM.447439.RYR3	0.000223543	0.00635206	-0.0413108
ZM.447439.TMEM132D	0.000224012	0.00635206	-0.0555148
BMS.536924.PCDHB4	0.000224631	0.0250539	-0.0725081
Temsirolimus.DSG1	0.00022484	0.0235688	-0.098007
AG.014699.LPPR4	0.000224952	0.00453426	0.0681961
WH.4.023.PODXL	0.000224997	0.0470525	0.0984724
Temsirolimus.AKAP11	0.000225404	0.0235688	-0.0874435
Vinblastine.PCDHAC2	0.000225724	0.0755272	-0.0755175
Mitomycin.C.PCDHB14	0.000225882	0.0236187	-0.0978893
BAY.61.3606.GABRA2	0.000225916	0.0314964	-0.0787273
BIBW2992.MAGEC1	0.000227254	0.0201301	0.0471387
FH535.CDH18	0.00022726	0.0277881	0.0388713
ABT.263.PCDHB2	0.000228698	0.0382611	0.0911073
NVP.BEZ235.SEZ6L	0.000229299	0.00673012	0.0473804
AZD.0530.FRMPD1	0.000232526	0.0204466	-0.0560355
FH535.LPHN3	0.000232537	0.0277881	0.0336671
AZD.0530.DNAH14	0.000234039	0.0204466	-0.0564783
CEP.701.IDH1	0.000234285	0.0445726	-0.0553072
Axitinib.SETX	0.000235504	0.0562855	-0.0557589
AG.014699.ODZ3	0.000236949	0.00471923	0.0640985
