# Supplementary material for: Discovering novel pharmacogenomic biomarkers by imputing drug response in cancer patients from large genomics studies
Source: HighWire-hosted journal article supplement (doi:10.1101/gr.221077.117), 2017-08-28
Supplement: Supplemental_Table_S9.xlsx [file Supplemental_Table_S9.xlsx]

## Sheet: Supp Tab 9
Supplementary Table 9: Imputed drug response for all TCGA drugs across all available patients, corrected for cancer type (see script "models_on_all_TCGA.R").
IMPORTANT NOTE: reliability of these predictions will vary, please cross reference with Supplementary Table 6 for estimates of reliability from cross-validation. We recommend only considering drugs with a Spearman's correlation of >0.3 from cross-validation. However, good values in cross-validation does not guarantee accurate predictions in TCGA. Also, please strongly consider the other caveats o…
	A5J1	A5J2	A5J3	A5J5	A5J6	A5J7	A5J8	A5J9	A5JA	A5JB	A5JC	A5JD	A5JE	A5JF	A5JG	A5JI	A5JJ	A5JK	A5JL	A5JM	A5JO	A5JP	A5JQ	A5JR	A5JS	A5JT	A5JV	A5JW	A5JX	A5JY	A5JZ	A5K0	A5K1	A5K2	A5K3	A5K4	A5K5	A5K6	A5K8	A5K9	A5KO	A5KT	A5KU	A5KV	A5KW	A5KX	A5KY	A5KZ	A5L3
A.443654	0.126487	-0.00393256	0.0762996	-0.253122	0.228361	-0.2339	0.0488402	-0.107602	0.0112059	-0.402732	-0.159117	0.0609902	-0.10089	-0.0148785	-0.0175376	-0.220859	-0.0944898	0.0277893	0.147566	-0.178349	0.0755479	-0.0786685	-0.0937026	0.048664	0.0111176	0.0647823	0.260416	-0.00882578	0.0544753	0.14298	0.000598761	-0.00205653	0.0462983	-0.0443421	0.176514	-0.0716392	0.0554269	0.127705	-0.131898	-0.0899717	-0.173104	0.149452	-0.0557161	0.255853	0.198629	-0.0317456	-0.0722387	-0.116768	0.147467
A.770041	0.327208	0.32574	0.471132	0.012129	0.029729	0.119053	-0.685119	-0.477944	0.425458	-0.675751	-0.392985	0.119284	0.0597954	-0.0583415	0.304923	-0.86928	-0.039732	-0.2408	0.486241	0.168894	-0.695703	-0.404348	-0.355743	0.00676048	0.41828	-0.268584	0.544841	0.0418361	-0.0889613	0.525367	-0.297554	-0.0301525	-0.567637	0.0469022	0.338227	-0.237634	0.348737	0.114586	-0.258455	-0.0669041	0.117379	0.0824434	-0.0222837	0.747254	0.485342	0.354366	0.0153107	-0.589776	0.197958
ABT.263	0.158099	0.101397	0.189884	-0.386375	-0.105601	0.178918	-0.244652	0.158948	0.0795406	0.22281	-0.0960338	0.212662	-0.165816	0.197377	0.0260712	-0.161686	-0.210328	-0.219054	-0.458431	0.0157484	-0.400143	0.386321	-0.224117	-0.230067	0.160901	-0.103408	-0.488336	0.327158	0.235457	-0.0215083	-0.539165	0.195697	-0.320597	0.471258	-0.139259	-0.0192364	0.585922	0.0564217	0.138615	0.377487	0.224443	-0.0368805	0.244922	0.183909	-0.0464757	0.333761	-0.525821	-0.258606	0.25658
ABT.888	0.00511003	0.0431682	0.0435905	-0.169902	-0.116412	-0.0151114	-0.0468128	0.0585732	0.0049753	-0.247174	0.0300856	-0.0351076	-0.0299213	0.100425	0.114342	0.172234	-0.0685183	-0.206395	-0.0101243	0.0441763	-0.185609	0.138634	0.00726613	-0.0427486	0.0268868	-0.0214269	-0.102395	0.174415	0.150571	-0.0147943	-0.203625	0.0797203	-0.0816804	0.0592765	-0.0603734	-0.0791776	0.128865	0.117577	0.13096	0.0246774	0.177953	-0.185947	0.157291	-0.0623091	0.043544	-0.170918	0.0121388	-0.114129	0.128943
AG.014699	-0.103524	-0.0235426	0.200257	0.00305998	0.17974	-0.0624079	-0.642035	-0.249187	0.366091	-0.336566	-0.120841	0.0307447	-0.180186	0.444699	0.0824379	-0.386793	0.139365	-0.211355	0.534239	-0.101266	-0.432404	-0.525467	-0.202589	-0.0567077	0.0373999	-0.150265	0.153919	0.5192	0.057521	0.139767	-0.358284	0.411349	-0.369406	-0.108403	0.286148	-0.146449	-0.328548	0.109076	0.414469	-0.0680887	0.285462	-0.133704	0.140902	-0.156952	0.304844	0.0885124	0.0545549	-0.558639	0.0836758
AICAR	0.152719	0.190308	0.354182	0.113424	-0.309591	0.0140517	0.258489	0.476886	-0.268744	-0.487351	-0.0868542	0.134391	0.491237	0.100934	0.100193	0.425549	0.484679	-0.239054	-0.359821	0.441166	-0.134036	0.256098	0.61222	-0.0838128	0.641342	-0.42222	-0.277668	-0.316554	0.428155	-0.166053	-0.725671	-0.259841	-0.23434	0.13934	-0.114579	-0.755186	0.454357	0.393923	-0.183456	0.2258	0.0501777	-0.376535	0.468647	-0.180448	-0.359272	-0.0628353	-0.0859249	0.125527	0.52367
AKT.inhibitor.VIII	0.246116	-0.24899	0.272697	0.082638	0.376922	0.0580796	0.256293	-0.128849	0.162526	0.399581	0.176572	-0.373743	0.479689	-0.266684	0.329232	-0.351591	0.0262678	0.219968	0.374792	-0.188138	-0.14507	0.0850555	-0.27006	-0.416247	-0.0508261	-0.15323	0.26039	-0.319733	-0.122871	0.500484	-0.157886	-0.0432294	0.127155	0.305321	0.484358	-0.0240095	0.029203	0.190017	-0.204757	-0.716174	-0.880273	0.619711	0.220761	0.428075	0.551077	0.153016	0.124809	-0.47783	0.108057
AMG.706	0.0255234	-0.000255801	-0.00154187	-0.146649	0.0163679	0.223534	-0.219488	0.0248186	0.057206	-0.0555116	-0.0320496	-0.00716037	0.0205937	0.0295532	0.0128866	-0.0984496	-0.172654	-0.146158	0.129244	0.230465	-0.0948713	0.0556417	-0.128138	0.0463257	0.0673417	-0.0436079	0.165391	0.191449	-0.0397619	0.0882672	-0.0981485	0.110545	-0.102775	0.0774858	-0.0106236	-0.0594448	0.0262202	0.104656	0.00618944	0.0848315	0.123926	-0.0672367	-0.0817492	-0.154394	-0.0332088	0.044787	-0.0410124	-0.258321	0.0357756
AP.24534	-0.0689362	-0.469924	0.483018	-0.0280878	-0.153982	0.21682	-1.12799	-0.504418	0.644967	-0.111924	-0.151148	-0.310019	0.425383	0.310565	0.63706	-0.42186	0.408139	-0.0825125	0.615967	0.292331	-1.20542	-0.0609705	-0.480923	-0.454228	0.179633	-0.363805	0.0828932	0.308089	-0.350288	0.478057	-0.147113	-0.188701	-0.176986	0.0817538	0.622778	0.0499602	0.0243497	0.179607	0.165585	0.164993	0.371362	0.035585	-0.0906831	0.570936	0.404199	0.247925	0.150155	-0.505208	0.223851
AS601245	0.115703	-0.299548	0.281849	-0.0960194	0.244326	0.0186648	0.0152133	-0.335925	0.321563	-0.0165731	0.0780431	-0.331675	0.631508	-0.411603	0.204099	0.0504496	0.0538273	0.0643304	0.107942	0.454366	-0.460557	0.199335	-0.143986	-0.0541566	0.0453916	-0.185923	0.269597	-0.325949	-0.393998	0.638054	-0.0873652	0.265447	-0.0928489	0.080639	0.397157	0.169817	0.360529	-0.0623266	-0.096696	0.151719	-0.432644	0.217884	0.319033	-0.087544	0.382527	0.313671	0.0563089	-0.122008	0.102516
ATRA	-0.306976	0.194754	0.335552	-0.110757	-0.463911	0.0467992	-0.388906	0.0146553	-0.239051	-0.412087	-0.0460349	0.0577453	-0.182553	0.392019	0.0894981	0.264083	0.00176625	-0.197083	-0.24474	-0.140477	-0.435768	0.00831072	0.0907629	-0.102716	0.0529588	0.15558	-0.379167	0.306678	0.142797	-0.0417095	-0.263925	0.179965	-0.22682	-0.082125	0.0880866	-0.107888	0.41558	-0.0140154	0.244346	-0.0443027	0.0551506	-0.284514	0.529316	-0.325684	0.00115519	-0.162585	-0.122527	-0.593226	0.119777
AUY922	0.0799991	-0.0902707	0.350504	-0.278054	0.338169	-0.216049	-0.218242	-0.321859	-0.0560164	-0.209408	-0.203191	-0.0983558	0.154647	-0.310007	0.0721189	-0.265224	-0.201514	-0.324148	0.245865	0.332016	-0.343572	-0.129819	0.0395189	0.0712417	0.0449542	-0.114498	0.0276605	-0.479553	-0.167444	0.220044	0.167633	-0.00978331	-0.0888583	-0.241844	0.27423	-0.00869757	0.13009	0.319986	-0.332391	0.260935	0.458248	0.104258	0.0639352	0.722216	0.673493	0.376577	-0.0500038	0.22845	0.30055
Axitinib	-0.350809	-0.0401252	0.122292	-0.407287	-0.24201	-0.0392683	-0.520756	-0.18223	0.333008	0.0182507	-0.29005	0.0947187	-0.388194	0.256154	-0.102375	-0.210975	0.381935	0.205784	0.361698	-0.410912	0.0794992	-0.142674	0.119772	0.5229	0.45973	0.753742	0.581596	0.053839	-0.336048	0.322076	0.314668	-0.46703	0.639455	-0.182313	0.149632	0.363718	-0.555808	-0.0206135	-0.0761631	-0.213145	0.417328	0.166814	0.0745911	-0.454189	0.209855	-0.452832	-0.3284	-0.521393	-0.33993
AZ628	0.206518	-0.246404	1.03927	0.089083	0.059479	-0.0142077	-0.512512	-1.03929	0.715585	-0.60263	-0.0989394	0.0610862	-0.289681	-0.704157	-0.0358836	0.46289	-0.471601	-0.523096	0.569515	-0.0526948	-0.415978	-0.398742	-0.0537162	0.451256	-0.355211	-0.0905238	0.14151	0.178786	-0.0202664	0.745605	0.683704	0.491754	-0.34941	-0.496516	0.942237	0.278773	-0.450438	-0.254742	-0.172816	-0.442025	0.45267	-0.57242	0.0871836	0.32761	0.0700464	0.372716	0.178435	-0.237355	0.0521891
AZD.0530	0.261333	0.277127	0.546719	-0.325796	0.0566178	-0.102939	-0.314932	-0.568132	0.382653	-0.340696	-0.334909	0.0748334	-0.350084	0.12361	0.169867	-0.837232	0.202511	-0.106673	0.38804	-0.0954085	-0.352056	-0.548457	-0.0154296	0.253276	0.517574	-0.096048	0.761711	0.021386	-0.0988089	0.323939	0.242299	0.0827815	-0.15314	-0.0895144	0.363376	-0.0503516	-0.162047	0.0938791	-0.374304	-0.0587365	0.116156	0.194611	0.0246857	0.126073	0.509699	0.227929	-0.0547537	-0.390968	-0.0406315
AZD.2281	-0.149333	-0.0338293	0.0486912	0.0272405	-0.157055	0.12549	-0.698394	-0.0721872	0.148331	-0.0523173	-0.194535	-0.207766	-0.068699	0.174469	0.209224	0.0291201	0.00638209	-0.554708	-0.198212	0.281882	-0.33467	-0.0485932	-0.221755	0.0442596	0.200356	-0.0139919	-0.347977	0.277338	-0.198817	-0.333621	0.0473026	-0.250813	0.0541788	-0.00207018	0.209737	0.173689	-0.0886073	-0.00319561	0.278075	0.068512	0.516841	-0.377912	-0.133473	-0.270404	-0.05208	-0.0678167	0.066277	-0.134689	0.143947
AZD6244	0.172084	0.192464	0.131286	0.117863	-0.531414	0.374212	0.637706	-0.0223772	0.521469	-0.193936	0.217365	-0.103224	0.42922	-0.241835	0.422911	0.225768	0.409436	-0.670671	0.305092	-0.0476827	-0.773445	0.502377	-0.190061	-0.199996	-0.310535	0.1771	-0.616418	0.226439	-0.222454	0.0367419	-0.0573877	-0.0956614	-0.282694	0.122656	0.0578876	-0.00713117	0.240974	-0.0355629	0.0194412	0.135275	0.741773	-0.34372	0.258469	-0.0720133	-0.131988	-0.280762	0.648839	0.149224	-0.26178
AZD6482	0.305135	-0.158206	0.40574	-0.200449	0.750292	-0.00495987	-1.08236	-0.104214	0.191972	0.179857	0.199533	-0.365791	0.447753	-0.123322	0.28484	-0.152121	-0.429286	-0.255634	0.344095	0.441115	-0.63978	0.358536	-0.303814	-0.515307	-0.0777733	-0.590525	0.170646	-0.0995358	-0.105428	0.387278	-0.25896	-0.312369	-0.0843188	0.405865	0.404089	-0.233257	0.591582	0.549883	0.00347234	-0.169231	-0.45964	0.132489	-0.25087	0.584149	0.273815	0.491164	0.207769	-0.343499	0.441897
AZD7762	0.185862	-0.37074	0.720484	-0.620888	-0.0975997	0.230786	-1.09739	-0.427573	0.43707	0.0659104	-0.0809023	-0.266038	-0.157091	0.10774	0.0448055	-0.29689	-0.0516679	-0.166072	0.284715	0.104883	-0.288169	0.183494	-0.055371	0.136388	0.779258	0.35824	0.0281505	0.0502317	-0.143257	0.446564	0.385974	0.0523562	0.345628	0.139971	0.291262	-0.00551723	-0.131486	-0.350567	-0.331079	-0.102755	0.636368	-0.17421	0.253199	-0.221436	0.369866	0.109857	-0.10947	-0.232712	0.218687
AZD8055	0.0883136	0.141711	0.48155	0.0834515	-0.336281	-0.233585	0.0093299	-0.440792	0.245393	0.422754	-0.305335	-0.0564946	-0.272112	-0.0577006	0.179899	-0.228313	0.296923	-0.167894	0.49254	-0.486547	-0.135448	-0.3305	-0.221011	0.126343	0.345266	0.306243	0.108244	-0.0544419	-0.188009	0.260285	0.139823	0.00373516	0.0398717	-0.284825	0.28138	0.0268313	-0.505567	0.116121	0.0482745	-0.233009	0.0811912	-0.155698	-0.101922	-0.292884	0.214116	-0.223049	-0.138719	-0.503703	0.273123
BAY.61.3606	-0.248798	-0.280051	0.406444	-0.147073	0.484146	0.249829	-0.435217	-0.396633	0.076685	-0.521509	-0.00392973	-0.157879	0.155446	0.0516215	0.145246	0.346946	-0.125001	-0.406334	0.173636	0.40709	-0.453078	-0.00463035	-0.106996	-0.104344	-0.0417925	-0.240098	-0.174278	-0.162575	-0.334545	-0.00119888	-0.230201	-0.504084	0.0342085	-0.155443	0.498844	-0.177344	0.175801	0.0954276	-0.0170493	0.0192382	0.323996	0.163314	0.0113511	0.169687	0.144699	0.251771	0.0798765	-0.0763935	0.215461
Bexarotene	0.0323931	-0.14751	-0.0297546	0.342183	-0.0836597	-0.0563423	-0.511642	-0.0711433	-0.0552006	0.288053	0.0023675	0.0130229	0.137203	-0.056549	-0.208595	-0.18628	0.331981	-0.0482326	-0.104654	0.124824	-0.266443	-0.0591821	-0.17224	-0.0528743	0.120961	-0.0641362	0.160262	-0.243087	-0.0546437	0.212457	0.177504	0.162736	-0.000532997	-0.0348092	0.10036	0.0591475	-0.0649579	-0.0264098	-0.0592433	0.127199	0.148008	-0.202918	0.0310459	0.0542188	0.040025	0.149191	-0.0333843	-0.00141382	0.0109424
BI.2536	0.0499472	-0.00607454	0.135021	-0.147526	0.136128	-0.193418	-0.0861803	-0.0990745	0.0633949	-0.489029	-0.164936	0.0211502	-0.0849183	-0.00654758	0.0251974	-0.152857	0.00615937	0.0673008	0.15306	-0.161194	-0.0607994	-0.00514027	-0.0692505	0.121626	0.00324959	0.0498641	0.33107	-0.0163176	0.00777287	0.128194	-0.031533	-0.0286786	0.000171199	-0.0636714	0.223659	-0.0955779	0.0595313	0.0409371	-0.0989627	-0.00816805	-0.0673613	0.090381	-0.017535	0.174104	0.216337	-0.00443364	0.0171073	-0.0868486	0.033331
BIBW2992	-0.103103	0.304869	0.0779946	-0.130696	-0.259411	0.237022	0.40543	0.0224789	0.0537597	-0.610207	-0.121503	-0.0689701	0.0249865	0.054725	0.155537	0.114776	0.00636051	-0.0291294	0.00541366	-0.290978	-0.249629	0.135021	-0.117029	-0.115833	0.0690733	0.138232	-0.144637	0.0299489	-0.0949603	0.2119	-0.517176	-0.00644098	-0.252541	-0.0900382	0.261754	-0.0197981	0.176643	-0.0240859	0.0285169	0.141997	-0.18683	-0.0939777	0.274471	-0.221375	-0.0479878	-0.329303	0.107362	0.158968	0.179588
Bicalutamide	0.0621721	0.000838522	-0.0303649	0.000233958	0.140437	0.0322104	0.0170488	-0.0650632	-0.0273878	-0.00913462	-0.0356505	0.00692907	0.0716515	-0.0882733	-0.0735763	-0.156288	0.0229813	0.0509506	0.0871682	0.0774673	0.0743785	-0.0205313	-0.0744113	-0.0115282	0.0492236	-0.0296401	0.11248	-0.0864322	-0.0679594	0.0925425	0.0593223	-0.0399853	0.00900466	0.0372584	0.0461293	-0.00189945	-0.0588092	0.0770845	-0.0713408	0.0414056	-0.0119371	0.0759391	-0.15493	0.070042	-0.00798167	0.0204439	0.0677889	0.0367233	0.0397171
BI.D1870	-0.275914	0.0639696	0.395747	-0.239514	-0.0893053	-0.0906708	-0.48104	-0.228089	-0.181914	-0.84518	-0.0700395	-0.0765588	-0.486992	0.236549	-0.197431	-0.0019246	-0.0449237	-0.185738	0.12877	-0.15629	-0.205095	0.0559896	-0.00329313	0.286447	0.287461	0.573562	0.052636	0.0193867	-0.0205554	-0.0630754	0.394598	-0.477314	0.287467	-0.385768	0.161793	0.228538	-0.0877771	0.0650334	-0.0236422	-0.138485	0.246443	-0.285239	0.129502	-0.00393618	0.246558	-0.240861	-0.216244	-0.337183	0.0524715
BIRB.0796	-0.0456478	-0.00749725	0.016203	-0.105136	-0.0330749	0.0921411	0.0505745	-0.0382669	-0.00846445	-0.0474077	-0.0229282	-0.0546021	0.0455587	-0.0192448	0.0259059	0.0470956	-0.0173957	0.0319068	-0.00721766	-0.00294528	0.0350746	0.0544579	0.0510646	0.0379661	0.0244596	0.011831	0.0369008	-0.0266547	-0.0223666	0.0262906	-0.0328107	-0.0182285	0.0535966	0.0278068	0.00317523	-0.00297992	0.0142928	-0.0157211	-0.0384626	0.00287577	0.0153659	0.0178865	0.0258201	-0.142118	0.0215608	-0.0524891	0.0287003	0.0138248	-0.00728135
Bleomycin	-0.842245	-1.27388	1.03351	0.0348564	-0.16879	0.142399	-0.640476	-0.462534	1.1767	-1.2604	0.175468	-0.701862	0.257059	-0.0924069	1.15614	0.57054	-0.209982	-0.33084	0.262445	-1.18262	-1.55369	-0.0178288	-0.328852	0.247231	-0.249636	0.342643	0.035196	-0.292122	-0.485587	-0.11347	-0.27376	0.260317	0.145573	-0.130425	1.15783	0.734753	-0.281441	-0.896131	0.0380588	-0.165709	0.0754228	0.362353	1.04979	0.0908858	0.976513	0.0842577	0.21847	-0.132599	0.194286
BMS.509744	0.175906	0.0203781	0.24079	-0.0237035	0.150231	-0.0188473	-0.248844	-0.090309	0.081943	-0.244801	-0.0619604	-0.0539074	0.112662	-0.115261	-0.0395998	-0.207751	-0.0019091	-0.116326	0.110906	-0.0466938	-0.127123	-0.118396	-0.111551	0.0485084	0.200581	-0.158953	0.30289	0.0691427	0.011277	0.0824728	0.000437678	0.0231155	-0.0925076	0.0837724	0.144444	-0.0789539	0.122572	0.0785691	-0.245705	-0.0210802	0.0813048	-0.0861023	0.140022	0.242646	0.085376	0.146681	0.0365997	-0.119078	-0.055566
BMS.536924	0.633993	0.361307	0.417909	-0.458723	0.193134	0.296247	-0.626028	-0.0615676	0.291691	-0.406538	0.176923	-0.23049	0.391448	-0.477446	-0.176479	-0.726555	-0.219507	-0.396137	0.487901	0.649568	-0.643867	-0.0789948	-0.209064	0.0220926	0.528151	-0.464075	0.676309	-0.0142575	0.11977	0.660045	0.0229326	0.213796	-0.463239	0.225561	0.0503374	-0.261492	0.489218	0.277037	-0.904835	0.314606	0.238958	-0.161709	0.128279	0.648624	0.365311	0.235083	0.255291	0.109467	-0.00914014
BMS.708163	-0.0661645	0.126792	0.00710088	0.0524401	-0.0257703	0.16425	0.0496958	-0.0930522	0.0340798	0.103009	0.00865639	-0.0042659	0.00891101	-0.0621346	-0.0473759	-0.0208274	-0.036848	-0.058192	-0.0700395	-0.0655445	0.0188552	-0.0759275	-0.000403763	0.0198479	0.0568051	-0.000914902	-0.0777803	-0.00807168	0.00861798	-0.0682913	0.0032118	-0.191808	0.025664	0.0232799	-0.0378938	0.0593264	0.00256535	-0.0828092	0.00602815	0.0418	0.15093	0.00980972	-0.0109073	-0.0534409	-0.141227	0.0682522	0.0180286	0.0797748	-0.163335
BMS.754807	0.43267	-0.325845	0.476361	-1.34924	0.83931	-0.331085	-0.323627	-0.147898	-0.368248	0.194203	0.0159542	-0.571023	0.348403	-0.528934	0.325679	-0.570631	-0.118033	-0.00485405	0.10153	0.479529	-0.506614	-0.341758	0.119538	0.230368	0.495595	-0.0464531	0.431103	-0.39784	-0.653343	0.204595	0.761832	0.0975376	0.537577	-0.324638	0.541182	0.328178	-0.0241758	0.776566	-1.05158	0.61305	-0.180122	0.0174258	-0.25992	0.543999	0.789827	0.350729	-0.0614852	0.703575	-0.0203713
Bortezomib	0.586914	-0.0318742	0.367671	0.404975	0.231084	-0.418978	-0.954607	-0.21815	0.291312	-0.243038	0.0584793	-0.268116	-0.332453	-0.441784	-0.0575068	-0.575651	-0.219419	-0.158156	0.870345	-0.359822	-0.481825	0.274283	-0.662831	0.102119	0.101767	-0.0806729	0.321781	0.090625	0.229278	0.156482	0.204586	-0.404225	-0.321496	-0.0990552	0.455746	0.158227	0.0846351	0.029919	-0.511604	-0.433128	0.235277	-0.225906	-0.245723	1.00842	0.581231	0.214263	-0.236628	-0.389212	0.158042
Bosutinib	-0.0555684	0.0173458	0.107145	0.0918218	-0.196492	0.0994889	-0.123002	0.0112733	0.0669245	-0.241013	0.0212214	-0.0790185	0.0335292	0.112584	0.0711404	0.11674	0.0789172	-0.157707	0.0105118	0.0980873	-0.217806	0.139409	-0.0462048	-0.0667689	0.0399071	0.00760871	-0.191953	0.024801	0.0337309	-0.0387019	-0.122147	-0.090221	-0.0753297	0.027189	0.0273056	-0.0165675	0.0612448	-0.0636702	0.139492	0.0816092	0.19458	-0.11258	0.135578	0.0244741	0.0622337	-0.0624033	0.0973158	-0.0357675	0.0570872
Bryostatin.1	0.0727686	-0.0300262	-0.0717448	-0.110571	0.157417	0.00921579	0.0307117	-0.0370415	0.0207316	-0.240017	0.000497347	-0.0159574	0.0565094	-0.0963424	-0.0875046	-0.177651	-0.0432203	0.154377	0.136707	0.11639	-0.000181567	-0.0935812	0.021189	0.142305	-0.112704	0.0889353	0.324445	-0.162853	-0.150642	0.21928	0.145134	0.000935731	0.0452358	-0.0474435	0.134262	0.148807	0.0777069	-0.0495138	-0.0902537	-0.0714253	-0.119175	0.0716206	-0.113569	-0.0311872	0.0535892	0.0605113	0.0328498	0.0409502	-0.0242696
BX.795	0.0745223	-0.293754	0.569934	0.338743	-0.259898	0.0110332	-1.68536	-0.231712	0.10575	-0.546818	-0.228351	-0.514452	0.0219405	0.399715	0.0589409	-0.588103	0.407845	-0.440066	0.236684	0.340153	-0.906382	-0.221375	-0.87549	-0.144894	0.917047	0.186894	-0.283625	0.413624	-0.197804	-0.31092	0.191005	-0.00276989	-0.092166	0.0423727	0.473792	0.422315	0.149053	0.0932322	0.233995	0.252641	0.85367	-0.533381	0.038457	0.442241	0.326364	0.273985	-0.0447557	-0.786859	0.791622
Camptothecin	-0.786857	-0.283581	0.931919	0.0533557	-0.222889	0.425752	-1.60325	0.424824	0.348132	-1.40645	0.0582739	-0.280294	-0.722	0.632063	0.472035	0.0600073	0.161682	-0.475275	-0.111571	0.0827268	-0.791311	-0.133986	-0.227367	0.221259	0.0585012	0.139223	-0.161925	0.455448	-0.0660308	-0.396851	-0.683674	0.518622	-0.287294	-0.0368134	0.104539	-0.360784	-0.185762	-0.0651269	0.101575	0.631089	1.20189	-0.369477	0.743211	-0.0825138	0.832915	0.0311175	0.344875	-0.660717	0.034833
CCT007093	-0.0297066	-0.0244477	-0.00409846	-0.00925383	0.0177883	0.0281448	-0.00550626	0.00714593	0.038217	0.102232	0.0174529	-0.0007898	0.0161966	-0.00428479	0.0205624	-0.0342117	0.00386652	-0.0141879	0.03663	0.0250939	0.00858531	-0.0222507	0.00548791	-0.0287452	-0.00478006	-0.040663	0.0178986	0.0252664	-0.0178545	0.02668	-0.0266724	0.0178989	-0.0285245	0.00342547	-0.0111303	-0.0138195	-0.0072731	0.0197315	0.00285689	0.0242998	0.0248288	0.0280623	-0.0143134	-0.0314843	0.00176588	0.0177815	0.00234031	-0.00774533	-0.0194039
CCT018159	-0.203318	0.0809905	-0.360399	-0.400128	0.327064	0.0110075	-0.115934	0.0639923	-0.323185	-1.07049	-0.0615351	0.26313	0.0049948	0.158757	-0.713851	0.229207	-0.0115093	0.102762	0.251537	0.0103453	-0.0625171	0.031954	0.113208	0.429633	-0.201393	0.357879	0.28307	-0.182738	-0.00854374	0.493052	-0.15773	-0.602422	0.0317311	-0.224435	0.460773	0.04938	0.304653	-0.36473	0.00821242	-0.356428	-0.181587	-0.182097	-0.0407156	-0.173748	-0.280447	-0.019727	-0.272308	0.0822695	0.44866
CEP.701	0.0385928	-0.20869	0.874712	-0.523629	-0.0707002	0.235947	-0.753434	-0.0838873	0.407645	-0.358449	-0.44349	-0.530262	0.233446	0.153882	0.224255	-0.40171	0.528163	-0.551117	0.782309	-0.131038	-0.661325	0.0592063	-0.159795	0.471814	0.542828	0.333393	0.340605	0.182899	-0.0816643	0.613888	0.296009	-0.473583	0.105781	-0.0964195	0.36549	0.0864496	-0.326216	-0.227287	-0.165866	0.263088	0.934758	-0.432861	-0.0965015	0.17283	0.558308	0.0889433	0.385659	-0.339097	-0.323596
CGP.082996	0.143831	-0.169034	0.500548	-0.00666733	0.0398304	-0.418478	-0.128381	0.00356885	-0.166482	-0.619801	-0.146954	-0.0705013	-0.124654	-0.0175162	0.0741987	-0.0467478	0.195052	-0.00937925	0.0344469	-0.0691296	-0.0783401	0.174461	0.101861	0.136311	-0.322602	-0.0334951	0.342907	0.0748166	0.296521	0.334968	-0.233936	-0.279433	0.0183591	-0.166823	0.392718	-0.252191	0.0441838	0.029093	0.224433	-0.223552	-0.180089	-0.0255396	0.134906	0.244327	0.342982	0.0738242	0.0151574	-0.209311	-0.0335617
CGP.60474	0.282599	0.00989945	0.0229189	-0.144992	0.174366	-0.156464	-0.178609	0.156554	-0.024708	-0.678576	0.000728694	-0.0789879	-0.0885392	0.0756286	0.157823	-0.257913	-0.0810997	0.0688488	0.178794	0.153285	-0.205359	0.264727	-0.119101	0.0760312	-0.127205	-0.045944	0.432314	-0.0770389	0.143974	0.0618857	-0.219321	-0.288435	-0.0988121	0.00762151	0.130709	-0.043609	0.265967	0.00366529	-0.0234464	0.0241239	-0.113255	-0.11529	-0.107859	0.29315	0.301275	0.0758252	-0.0295952	0.071056	0.0298059
CHIR.99021	-0.189962	-0.282154	0.133063	0.21475	-0.036321	0.035313	-0.248598	-0.318622	0.162806	-0.254361	0.13088	0.0559067	0.0455233	-0.111672	-0.176321	-0.0645205	0.187767	0.10609	0.290679	0.0659728	-0.272712	0.102646	-0.0814269	0.0956007	-0.0112226	0.230813	0.324987	-0.163009	-0.101351	0.524388	0.184042	0.0522784	-0.00405293	-0.146095	0.409515	0.367457	0.207584	-0.1839	-0.232987	-0.00695276	0.0269695	-0.0503137	0.190916	-0.170556	0.0981962	0.203479	-0.331572	-0.0901393	-0.0060612
CI.1040	0.0911082	0.0216187	0.117147	0.363041	-0.181405	0.0896836	-0.124838	0.0228162	0.169164	-0.157695	0.097874	-0.0996831	0.057944	-0.00403752	0.0496316	0.0752424	0.102634	-0.159059	-0.0379729	0.123711	-0.246193	0.142822	-0.0974883	-0.0690715	-0.0498593	-0.0432235	-0.290738	0.00537725	0.0487302	-0.0987439	0.0223981	-0.0662467	-0.110856	0.0247147	0.00966837	0.0408964	0.0216202	-0.151062	0.0984892	0.0160403	0.276157	-0.197377	0.0592945	0.10853	0.0182147	0.0588406	0.162671	0.115675	-0.0610588
Cisplatin	-0.274236	-0.239714	0.402047	0.424957	-0.142968	-0.238502	-1.08557	-0.0573148	0.099678	-0.476408	-0.0280144	0.396225	-0.209297	0.584886	0.194154	-0.0481831	0.427685	-0.167107	0.167111	-0.0589585	-0.54054	-0.361426	0.18766	-0.0519027	0.261124	0.00544958	0.0761974	0.216106	0.0607529	-0.172182	-0.293144	0.277805	-0.314364	-0.134678	0.111009	-0.360092	0.0277924	0.0290037	0.0445853	-0.516587	0.463407	-0.00527147	0.29116	0.268088	0.156245	0.0526568	-0.223754	-0.645475	0.41774
CMK	0.161209	0.0412795	0.147703	-0.105684	0.166634	-0.0467734	0.0311931	-0.109035	0.095586	-0.217243	-0.156656	-0.0677119	0.00119435	-0.0611338	0.0364971	-0.250433	-0.133216	0.0772088	0.282558	-0.0977308	0.0832407	0.104571	-0.17746	-0.0513991	-0.00514689	-0.0304475	0.214826	-0.0542791	-0.0362259	0.176689	-0.112061	-0.0967079	-0.0444119	0.0145715	0.109941	-0.116556	0.0948518	0.0340135	-0.0882509	-0.0882596	-0.155312	0.192297	-0.125972	0.187501	0.140189	0.0767803	-0.0363389	-0.105727	0.101112
Cyclopamine	0.127291	-0.195357	0.0903663	0.0652701	0.147846	-0.14645	-0.330378	-0.0137276	-0.0220108	-0.184326	0.00112747	0.0145808	0.1047	0.0534063	-0.0755633	-0.0374795	0.0155901	0.00113463	0.102669	0.0266736	-0.172373	0.114658	-0.0218113	0.0232991	-0.0419716	-0.0207375	0.230926	0.043421	0.146224	0.112061	-0.088398	-0.0548921	-0.101016	0.0244604	0.166921	-0.042766	0.110016	0.0279097	0.0661958	-0.133379	-0.0974731	0.0511536	0.0547789	0.282942	0.0456378	0.0440459	0.0436374	-0.060265	0.00068175
Cytarabine	-0.0364362	-0.105911	0.166857	0.074205	-0.0441814	0.0494594	-0.346177	-0.110892	0.130171	-0.11705	0.000647984	-0.0806728	-0.00110721	0.0883151	0.0320062	-0.0191185	0.0863492	-0.0496434	0.124163	-0.0277476	-0.190361	-0.0250552	-0.10636	-0.0272523	0.0521061	-0.00285213	0.0102728	0.0872629	0.0135882	0.0239465	-0.0550194	-0.0095257	-0.0620401	0.0173991	0.147506	-0.00892945	-0.0276626	-0.0608442	0.0283794	-0.0588891	0.174841	-0.0657823	0.111434	-0.0230108	0.0897312	0.0193633	0.0179658	-0.225175	0.0569585
Dasatinib	0.65715	0.329859	1.05364	0.746294	-0.0927015	-0.0748881	-1.45846	-0.990252	1.04643	-0.921013	-0.494908	-0.25926	-0.462411	0.0865033	0.663689	-1.56145	0.649604	-0.409608	1.23248	0.0970989	-1.52856	-0.381158	-0.645978	-0.200136	0.503454	-0.353028	0.639106	0.182378	0.133263	0.607135	-0.138916	0.00496809	-0.719199	-0.242113	0.84123	-0.0914784	0.244903	0.13977	0.012178	-0.247887	0.72581	-0.311657	-0.229568	0.926552	0.985401	0.357066	0.0618726	-0.72596	0.280482
DMOG	0.256645	-0.0298514	0.175591	0.392643	-0.293386	0.351401	-0.512816	-0.300153	0.372821	-0.510447	-0.0365042	-0.531411	-0.31945	0.328356	0.358553	-0.560227	0.588304	-0.668671	-0.290458	0.385513	-0.960062	0.172587	-0.580187	-0.743096	-0.155311	-0.457974	-0.476534	0.138149	-0.371321	-0.152455	-0.301589	0.306836	-0.200982	0.112472	0.509804	-0.168957	0.0697044	-0.325873	0.522851	0.263252	0.401683	-0.0437842	0.299446	0.73071	0.527589	0.406668	0.541578	0.283534	-0.106254
Docetaxel	-0.212676	-0.169715	0.292171	-0.166005	0.0875173	-0.281733	-0.733624	0.109843	0.0768143	-0.873275	-0.262093	-0.353183	-0.261498	0.144133	0.0111819	-0.478901	0.331878	0.181499	0.174911	-0.103044	-0.140372	0.0269199	-0.272847	0.329323	0.148692	0.572117	0.562681	-0.0513456	-0.238422	0.394223	0.280698	0.153936	0.161531	-0.321179	0.324339	0.146562	-0.338035	-0.0855383	-0.199993	0.122065	0.15883	-0.176818	-0.165125	-0.231239	0.343643	0.271415	-0.183356	-0.347836	0.024264
Doxorubicin	-0.547441	-0.965543	0.392181	-0.224951	0.346528	-0.589691	-0.0859144	-0.528536	0.422779	-0.795809	-0.474927	-0.226933	-0.47915	-0.110241	0.438406	0.0556374	-0.247606	-0.24783	0.419159	-0.689842	-0.361332	-0.200849	0.141166	0.480906	-0.0852942	0.592079	0.0635877	-0.292057	-0.467762	0.173435	0.227498	-0.114092	0.477742	-0.712544	0.50467	0.681147	-0.580721	0.0788103	0.23285	-0.154982	0.286423	0.316586	0.261621	-0.128456	1.20738	0.00553341	0.128378	-0.0483953	0.141821
EHT.1864	0.0323723	0.254043	0.0722399	-0.168413	0.0743924	0.0665017	-0.157349	-0.0159093	0.00356259	1.03307	0.0706716	-0.217701	0.0252651	-0.0947034	0.0896546	-0.173814	-0.166771	-0.0416423	0.359538	-0.260944	0.100958	-0.23751	-0.276979	-0.00610214	0.0948422	0.0473995	-0.0252106	0.380117	0.0575107	-0.0736812	-0.0523781	-0.471106	-0.138529	-0.0200032	-0.0303849	-0.147584	-0.487994	0.104592	0.0452425	-0.256795	-0.0763173	0.101428	-0.116444	-0.314067	-0.02992	-0.0611592	-0.0706969	-0.425962	-0.222055
Elesclomol	-0.111115	-0.32561	0.812586	-0.621752	0.372308	-0.158595	-0.0913234	-0.664288	0.604888	0.325743	-0.140037	-0.218476	-0.0483964	-0.289049	-0.30374	-0.73035	0.00696014	0.0839949	0.984154	-0.212178	0.273565	-0.331867	-0.175592	0.327529	0.490065	0.176769	0.883764	-0.0840151	-0.0945626	0.780698	0.43633	-0.335078	0.220512	-0.142902	0.484183	-0.208403	-0.645427	0.15686	-0.560912	-0.229396	0.14506	0.546707	-0.0553142	-0.390961	0.780194	-0.135997	-0.352277	-0.0775159	0.0279747
Embelin	-0.173533	-0.344332	-0.138686	0.119349	0.207749	-0.213559	-0.25865	-0.513145	-0.174845	0.140868	-0.213566	0.197213	0.151622	-0.0820583	-0.11763	0.25396	0.0365979	-0.0684157	-0.271894	-0.00549704	0.0580922	-0.1414	0.0800411	0.106876	-0.1149	0.0938175	0.226793	-0.472422	-0.478672	0.0961912	0.283447	-0.238171	0.20784	-0.165806	0.272944	0.287238	-0.0926643	-0.0620395	-0.129133	-0.0916512	0.0762666	0.233369	-0.190671	0.255168	-0.20798	0.197438	-0.0727269	-0.0562475	0.131864
Epothilone.B	-0.0667824	-0.0598698	0.019749	0.0817253	0.0264952	-0.13467	-0.00914658	-0.195616	0.0770617	-0.350997	-0.0787055	-0.00572278	0.140053	-0.202248	-0.00939712	0.042927	0.0580058	0.0749142	0.0501175	-0.0157996	-0.102233	0.0607585	0.057766	0.0728033	-0.0964426	0.0323606	0.200712	-0.342772	-0.158916	0.144102	0.027811	-0.0474698	0.0589127	-0.0573511	0.234179	0.0725291	-0.000232172	-0.00280211	-0.0395398	0.0538855	-0.0328652	0.167102	-0.0471301	0.076032	0.142882	0.106405	0.0642217	0.0450246	0.067213
Erlotinib	0.398145	0.314692	0.245529	-0.217806	-0.201297	-0.0868637	0.324342	-0.0832006	0.346939	-0.171928	-0.301617	-0.000459205	0.142983	-0.128707	0.231777	-0.32	-0.00432674	-0.119091	0.0777651	-0.0576568	-0.589663	0.0565178	-0.0279873	0.0547978	0.0664836	-0.260525	0.437115	-0.043216	-0.0309617	0.352834	-0.248957	0.0214364	-0.377175	0.0910806	0.333964	-0.167755	0.196156	-0.00160431	-0.158719	0.280137	-0.0945383	0.126418	-0.214346	0.290689	0.239851	0.112517	0.329132	0.1392	0.0725725
Etoposide	-0.171628	-0.215276	0.15655	0.114926	-0.0420656	-0.054472	-0.313723	-0.196983	0.147781	-0.288138	-0.0409408	-0.0495084	0.00197067	0.110312	0.0981123	0.0877671	0.028131	-0.0336382	0.034444	-0.165278	-0.23172	-0.0195133	-0.0505609	2.79722e-05	-0.0669056	0.0121793	0.00443393	-0.0433667	-0.0617933	-0.0208873	-0.0699568	-0.130887	0.00746218	0.00565274	0.303573	0.0449288	0.0118576	-0.104071	0.100938	-0.137289	0.0838746	0.0402258	0.111665	0.0715064	0.16259	0.0461917	0.0197255	-0.187153	0.141985
FH535	-0.0335634	-0.240738	-0.123403	0.329067	0.133438	-0.13265	0.279076	-0.18856	0.128939	0.557637	-0.0738089	-0.0864085	0.316653	-0.190366	0.0083269	0.0259668	0.429178	0.187958	-0.117132	-0.192005	0.109732	-0.110467	0.0468459	0.00304509	-0.219015	0.153274	0.201221	-0.486747	-0.344543	0.249216	0.48474	-0.200923	0.267066	-0.130119	0.0776927	0.324672	-0.0201814	-0.253272	-0.194697	-0.0880689	0.00670127	0.277291	-0.0503731	-0.286762	0.153091	0.131849	0.036057	0.473666	-0.225381
FTI.277	0.0665377	-0.0244468	0.0522894	0.161264	0.140235	0.0231355	0.119085	-0.0196607	0.123046	0.0616552	0.0662778	-0.145028	0.134575	-0.0988705	0.105435	-0.0907166	0.0396721	0.0847094	0.186212	0.0894692	0.0723033	0.0798478	-0.137164	-0.241997	-0.0246632	-0.36103	-0.0389265	-0.125315	-0.0173448	0.14938	-0.247722	0.0228653	-0.135243	0.0448444	0.0862836	-0.125075	0.0548535	0.109314	-0.0548574	-0.0413895	-0.0341183	0.0696846	-0.129972	-0.0385115	0.110211	0.0700333	0.16882	-0.000729445	0.112599
GDC.0449	-0.108713	-0.00524553	0.212284	0.0560668	-0.250581	0.061779	-0.271681	-0.137624	0.164377	-0.200802	-0.144202	0.0555344	-0.0438731	0.11305	0.0911755	-0.0984307	0.111399	-0.133079	0.107735	0.0565192	-0.349217	-0.0803599	-0.0554496	0.0821317	0.235979	0.0826777	-0.0802941	0.141667	-0.0297762	0.1178	-0.125445	-0.0513846	-0.107755	-0.00691664	0.217023	-0.00422221	0.0519132	0.0281828	0.0753496	-0.0802029	0.109849	-0.060988	0.130695	-0.143487	0.121385	-0.221624	-0.0134737	-0.223875	0.130425
GDC0941	0.118323	-0.026863	0.559874	0.109468	-0.255646	0.113672	-0.556236	-0.128816	0.337947	0.473924	-0.1043	-0.0218815	0.0349888	0.0652752	0.565967	-0.421866	-0.136505	-0.210076	0.0500406	-0.25329	-0.340528	0.119768	-0.595325	0.026796	0.0481011	0.101727	0.04669	-0.0980156	-0.436962	0.047761	0.309984	-0.406213	-0.206311	0.0829988	0.96166	-0.155845	-0.243421	0.132144	0.179098	-0.362297	-0.203726	-0.516186	0.00259783	-0.0344559	0.491742	0.0480659	0.025422	-0.793139	0.3984
Gefitinib	-0.188019	0.644073	-0.0498903	-0.400821	-0.768314	0.715778	-0.0468159	-0.0748005	0.0945157	-0.52809	0.122384	-0.110093	0.370067	0.0773717	-0.0876057	0.104945	-0.240951	-0.3668	-0.27539	0.665388	-0.532972	0.0837614	-0.0193715	-0.138062	0.516503	0.0238053	-0.380579	0.0848495	-0.136716	0.226532	-0.443442	0.274333	-0.409714	0.198934	-0.289968	0.152386	0.700321	0.102271	-0.0546385	0.344452	0.201578	-0.0839839	0.519163	-0.325847	-0.0303163	-0.163688	0.101549	0.236542	0.119771
Gemcitabine	-0.551487	-0.153674	0.785557	0.464766	-0.0778124	-0.653899	-1.25265	-0.449584	0.223071	-1.75816	-0.193934	-0.282319	-0.257598	-0.172252	0.0911334	0.273086	0.0964654	-0.53779	0.867252	-0.304309	-1.70452	-0.447235	0.0464253	0.369799	0.586281	0.141171	-0.207748	-0.47865	0.00793286	0.244589	-0.338895	0.15912	-0.12529	-0.624401	0.556	0.272767	0.0943897	-0.175074	0.088608	-0.218069	1.11321	-0.00973292	0.72026	0.554013	1.61899	0.0976155	0.00873823	-0.935823	1.07001
GNF.2	0.166136	0.0103934	0.131229	0.0499333	-0.161079	0.0774437	-0.055129	-0.0372003	0.141905	-0.0948659	-0.0752074	-0.143646	0.0542938	0.0242172	0.154168	-0.270689	0.185684	0.00688254	0.0624512	0.0021019	-0.203049	0.0456466	-0.208254	-0.066053	0.152473	-0.0563707	-0.0196895	0.13487	-0.105616	0.266912	-0.0670308	0.028735	-0.0594691	0.0392589	0.121714	-0.0153808	-0.129351	0.0120104	0.0129341	0.0199681	-0.00170676	-0.0532409	-0.0345593	0.0376645	0.161474	-0.0790457	0.146918	-0.00120547	-0.0463653
GSK269962A	0.372761	0.173199	0.166392	-0.181179	0.320851	0.417361	-1.12093	-0.189768	0.166763	-0.374754	0.0151667	-0.218198	0.0700997	-0.190489	-0.314445	-0.696639	-0.160697	0.0666274	0.50745	0.258334	-0.3173	0.0724728	-0.542038	-0.0451765	0.493455	-0.267173	0.623455	0.270689	0.0684784	0.707751	-0.229934	0.143409	-0.425773	0.0205415	0.364995	-0.137123	0.375037	-0.0770777	-0.434193	-0.18274	0.0773341	-0.13483	-0.0832404	0.447897	0.188596	0.133356	-0.121217	-0.305784	-0.049137
GSK.650394	-0.355201	-0.209212	0.128309	-0.00595322	-0.0367698	-0.118865	-0.393062	-0.231121	-0.000126648	-0.337484	0.0354821	-0.168245	0.238474	-0.177629	0.311726	0.0850091	0.0763008	0.213863	0.122323	-0.0138375	-0.411055	-0.0738628	0.10038	0.250279	0.0209689	0.207584	0.32478	-0.621958	-0.386346	0.347927	0.383582	-0.363276	0.309866	-0.335766	0.491153	0.185563	0.0823605	-0.0240786	-0.106044	-0.0296254	-0.0694476	0.058348	0.305907	-0.00763496	0.730805	0.135705	-0.0271887	-0.3287	-0.0548491
GW.441756	0.00925052	0.0168536	-0.00526529	-0.0795076	-0.0370727	-0.02878	0.132605	-0.0206802	0.0357313	-0.0891918	-0.0303588	0.016705	-0.0207803	-0.0246006	0.00877083	0.00871898	0.00729472	0.0619062	-0.00495498	-0.10713	0.0571817	-0.0202499	0.0728573	0.0613905	-0.00418198	0.0497655	0.101838	-0.0251685	-0.00215889	0.0362697	0.00672941	-0.00557447	0.0584424	-0.0182851	0.0115168	0.0167876	-0.0265668	-0.00291575	-0.0486261	-0.0500646	-0.042726	0.0678029	0.0327773	-0.0728186	0.0344212	-0.0599795	0.0110565	0.0479201	-0.0529675
GW843682X	0.0813333	0.0463017	0.0998409	-0.120351	0.0341426	-0.119412	-0.118256	-0.00659157	0.0188824	-0.425156	-0.0988037	-0.010203	-0.0862675	0.0110881	-0.00339089	-0.0813277	-0.0306933	-0.0363916	0.0253988	-0.0248459	-0.145562	0.0555112	-0.0591201	0.0934497	0.0142692	0.0790839	0.161421	0.0075599	0.063826	0.048807	0.0138987	-0.0418698	-0.011231	-0.0352531	0.13974	-0.0718231	0.0742314	0.0161902	-0.0423694	0.0512809	0.0108064	-0.0228325	0.0222687	0.19447	0.134705	-0.0322057	0.0160702	-0.0689777	0.0358192
Imatinib	0.0226789	-0.0117661	0.00928965	0.000201064	-0.0260238	0.0277006	-0.115541	-0.0364617	0.00733805	0.017634	-0.0249709	0.0100258	0.0176449	-0.00144416	0.00370619	-0.0803981	0.0386504	0.045521	-0.0196981	0.0252703	-0.0343928	-0.0542877	-0.00975089	0.0205176	0.056952	-0.0230354	0.0891043	0.0230534	-0.0604126	0.0646411	0.0316673	0.0783541	-0.035363	-0.00212776	0.0721521	0.0201874	-0.0136494	0.0309969	-0.0292693	0.0267989	-0.0254503	0.013288	-0.00603826	-0.0528675	-0.0258872	0.0173826	-0.00543767	-0.0544964	0.0130685
IPA.3	0.195447	-0.295042	-0.0892353	0.199289	0.259221	-0.350524	-0.024697	0.0857699	-0.399792	0.203107	0.228304	-0.191601	0.173838	0.0323349	-0.0783496	0.101252	-0.0487098	-0.255413	-0.0529511	0.15498	-0.124286	0.275774	0.0701363	-0.178121	-0.0333684	-0.118833	-0.16848	-0.273035	0.166425	-0.527168	0.0514014	-0.38006	0.0722518	0.0915654	-0.00133182	0.0452979	0.152693	-0.0586193	0.109063	0.076649	0.191898	-0.0716554	0.0756552	0.208262	-0.0226256	0.323954	0.0125387	0.103064	0.0897239
JNJ.26854165	-0.011429	0.0831904	0.486322	0.104619	0.0791881	0.0992644	-0.39316	-0.254711	0.327011	0.183981	-0.113936	-0.249904	-0.152892	0.0279069	-0.057437	-0.417427	0.198047	-0.164904	0.301887	0.182527	-0.100903	-0.296858	-0.223778	-0.236362	0.583624	-0.116353	-0.0983589	0.190954	0.00558262	-0.0677718	-0.0259412	0.222803	-0.262073	-0.106298	-0.188516	-0.160403	-0.14276	-0.0150027	-0.174784	0.041759	0.558556	0.0403439	0.0329812	0.0282223	0.180503	-0.153628	-0.000477322	-0.0490197	0.0769594
JNK.9L	-0.0367548	-0.0301418	0.0202859	0.0680431	-0.0941633	0.00711222	-0.0944638	-0.036794	0.0638801	-0.0613457	0.0281072	-0.0330166	0.0447242	0.0098772	0.0381395	0.0934863	0.0622847	-0.0439031	-0.0189374	0.0681562	-0.16046	0.0281009	0.0273101	0.00625207	-0.0453819	0.0104668	-0.0500233	-0.0716547	-0.0386575	0.0289856	0.012408	-0.063796	0.0156117	-0.0148501	0.0764155	0.0461601	0.00297657	-0.0544335	0.0547569	0.0178681	0.061473	-0.0397096	0.0356289	0.0222481	0.0343454	-0.00194107	0.0722556	0.0509832	0.00535463
JNK.Inhibitor.VIII	0.128371	0.178768	0.0535362	-0.0997076	0.00321904	0.0679675	-0.183244	0.0730946	-0.0492296	-0.180607	-0.0737286	-0.0595754	0.0211843	-0.00595121	-0.0873879	0.0117276	-0.170109	-0.171467	-0.0049443	0.175593	-0.0740739	0.197294	-0.0580415	-0.108005	0.0988987	-0.0927671	-0.119483	-0.00863972	0.134341	-0.0160945	-0.176753	0.0941218	-0.134725	0.128804	-0.158245	-0.102004	0.26652	0.0562733	-0.0439051	0.0112644	0.0690312	0.0149175	-0.00952563	0.190241	-0.0171089	0.0198142	-0.0216433	-0.0456199	0.218287
JW.7.52.1	0.365344	0.101687	0.187515	0.181207	-0.0347143	-0.328433	-0.0991133	-0.0689593	0.0705752	-0.353995	-0.161185	0.0221877	0.0137772	-0.136336	0.0993578	-0.228615	0.0277129	-0.0242657	0.064359	-0.0835775	-0.258651	0.0493461	-0.242742	0.0355451	-0.0176656	-0.082641	0.248435	-0.0960132	0.113735	0.19951	0.016727	0.0325386	-0.131656	-0.0432965	0.197123	-0.184054	-0.0128286	0.13008	-0.0130581	0.0156088	-0.104061	-0.0490075	-0.117582	0.460001	0.304254	0.0385405	0.0851485	-0.090029	0.137924
KIN001.135	0.0373217	0.0237034	-0.0862365	-0.0956802	0.184558	-0.0271141	-0.0432873	0.00797825	-0.0157834	0.0571584	-0.00896988	0.026977	-0.0214642	-0.0406638	-0.0281447	-0.122428	-0.122591	0.0496222	-0.0194307	-0.028886	0.119647	0.0241168	-0.0242903	0.00416368	-0.00573527	-0.0828357	0.146465	0.0206293	0.0408906	0.0896733	-0.0196636	0.018416	-0.0467733	0.0364184	0.00571743	-0.126567	0.0701295	0.0638139	-0.103699	0.00423572	-0.14481	0.00280524	-0.0656977	0.072238	-0.0578984	0.078178	0.0059838	0.118893	-0.0197067
KU.55933	-0.0191941	-0.00614432	0.196097	-0.157336	-0.150308	0.0369362	-0.306104	-0.0321872	0.305657	-0.442594	0.0525336	-0.00264537	-0.0445889	-0.0563729	0.0286139	0.0867635	-0.182568	-0.181176	0.167838	-0.0153809	-0.456657	-0.0647691	-0.123086	0.15009	0.0153459	0.108957	0.0707844	0.0708944	0.111772	0.140027	0.0133907	-0.129744	0.00344656	0.0494178	0.311765	-0.0915856	0.0235338	-0.0121866	0.160694	-0.180361	0.147157	-0.10331	-0.0244043	-0.0738186	0.1394	0.0356711	-0.0166999	-0.237297	0.06567
Lapatinib	0.260426	0.208065	0.0085742	0.187417	0.112669	0.114762	0.287588	0.0395016	0.426908	0.129761	-0.0244904	-0.111515	0.398553	-0.384065	0.296023	-0.583983	0.0816033	-0.134078	0.103355	0.0658929	-0.133872	0.00251246	-0.384491	-0.336323	0.199337	-0.392879	0.256077	-0.0281682	-0.100382	0.349135	-0.255919	0.268093	-0.339911	0.292368	0.0323159	-0.317155	0.209471	0.0705224	-0.229878	0.0613748	-0.16844	0.224578	-0.310246	0.182035	0.184111	0.225723	0.313785	0.101861	-0.0223505
Lenalidomide	-0.0560292	0.051172	0.0812907	-0.11075	-0.169327	-0.0172655	-0.0256335	0.00967407	0.0372977	-0.123278	-0.0171487	-0.0315085	-0.0495663	0.0769721	0.0478584	0.0695439	0.00745854	-0.0643351	0.0318592	0.0336119	-0.0825393	0.0483747	0.045961	0.00432045	0.0920946	0.0556559	-0.0614143	0.107976	0.0782234	0.0118141	-0.0756803	-0.00141138	0.0291385	0.00408185	-0.0675921	0.0156688	0.108975	0.0737512	0.0377017	0.0167683	0.116109	-0.0668306	0.154206	-0.0855316	0.100056	-0.125381	-0.00149764	-0.0228473	0.00791042
LFM.A13	0.197704	-0.0922764	0.00482613	-0.153089	0.161242	0.148586	-0.00892669	-0.0670486	0.0279118	0.179853	-0.114852	-0.205311	0.147744	-0.0731905	-0.0095442	-0.389954	0.141997	-0.0151451	0.105151	0.392531	0.092497	0.0386901	-0.0815615	-0.127388	0.139821	-0.206796	0.0371618	-0.0539772	-0.223752	0.355723	-0.159494	0.144662	-0.0803002	0.0526441	-0.0957383	-0.055465	0.155924	0.104776	-0.133972	0.18507	0.128044	0.213842	-0.0825141	-0.0551363	0.139784	0.00454678	0.134786	0.101714	-0.0876953
Metformin	0.0845139	0.208308	-0.0168941	-0.282731	-0.188922	-0.0195548	-0.300832	0.229023	-0.108119	-0.257628	0.218431	-0.223075	0.0309524	0.266565	-0.160712	0.1413	-0.201841	0.0204322	-0.0338275	0.14842	-0.493581	-0.188726	-0.0372132	0.141116	0.122681	0.370838	-0.035211	0.0906441	0.254962	0.027256	-0.0868366	-0.199179	-0.166992	-0.0246333	0.171111	0.0298246	0.189365	-0.0103822	-0.00313615	-0.16548	-0.0145951	-0.323726	0.475737	-0.161644	0.0920588	-0.190917	-0.229693	-0.194594	0.0351193
Methotrexate	0.00198119	0.0199667	0.606214	-0.0634457	-0.554178	0.285445	-0.407038	0.261464	0.0862282	-0.594907	0.0255045	-0.0738349	0.253114	0.387886	0.186305	0.323003	-0.0540394	-0.555171	-0.147978	0.496031	-0.646742	0.401869	0.0691702	-0.123582	0.25741	-0.373403	-0.397406	0.427916	0.413497	-0.0744905	-0.651676	-0.169084	-0.561641	0.312694	0.0582774	-0.481735	0.441476	-0.148773	0.246792	0.272411	0.445719	-0.602124	0.300402	-0.336911	0.00749195	-0.343492	0.235382	-0.537426	0.428753
MG.132	0.401281	-0.0856399	0.143083	0.526521	-0.117833	0.129539	-0.394265	-0.218423	0.546203	0.417394	0.157189	-0.588536	0.197164	-0.458192	-0.0372798	-0.546929	0.134808	0.236596	0.473758	0.119853	-0.411487	0.206021	-0.656326	-0.172424	0.0543204	-0.0488381	0.11819	-0.0791735	-0.224651	0.48589	0.192789	0.0814611	-0.320086	-0.00538067	0.134226	0.253797	0.0893255	-0.210986	-0.381344	0.0525109	0.152336	0.0867879	-0.0994544	0.19933	0.457905	0.273764	0.0156359	0.20767	-0.302828
Midostaurin	0.0970714	-0.641195	0.456054	0.130252	0.362486	0.381856	-0.988227	-0.395636	0.62602	-0.0452524	0.0214715	-0.747064	0.519782	0.0323897	0.407716	-0.629418	0.405486	-0.0527292	0.775861	0.320331	-0.952369	-0.155716	-0.805986	-0.564442	0.242767	-0.369073	-0.189945	0.0673711	-0.325824	0.287136	-0.23507	0.0479138	-0.096483	0.0104622	0.801668	0.128188	-0.0415778	-0.198937	0.0188931	-0.0424451	-0.0322692	0.263023	0.0220493	0.369012	0.697039	0.365698	0.291278	-0.605708	0.385601
Mitomycin.C	-0.132401	-0.436588	0.429427	-0.111514	-0.175553	0.264345	-0.977204	0.280742	0.719049	-1.92839	0.214881	-0.312429	-0.170598	-0.0232806	0.403644	0.238207	-0.217369	-0.392748	-0.347028	0.0854081	-1.05733	-0.05505	0.29939	0.398789	0.046488	0.0633941	-0.176204	-0.204888	0.0519716	0.137074	-0.24587	0.335517	-0.0180558	0.0841812	0.243465	0.315676	0.057959	-0.113947	0.00016738	0.0396739	0.67429	0.0213886	0.43375	0.387288	0.834931	-0.161305	0.649023	0.103803	-0.0741092
MK.2206	0.0279888	-0.0434672	0.0694848	-0.00129372	-0.0586533	-0.0354092	-0.131329	-0.0305004	0.0308838	0.0348344	-0.0259773	-0.0191236	0.0277985	0.0744502	0.0151266	-6.5143e-05	-0.0281469	-0.0569227	0.0499008	0.0149109	-0.122887	-0.0042774	-0.0825973	-0.0341628	0.0206993	0.0223334	0.00184156	0.0373823	-0.000949959	0.111303	-0.0128462	-0.0040779	-0.00808401	0.0205526	0.110095	0.0252213	0.0213191	0.0332064	0.0877141	-0.0786382	-0.0765974	-0.0442643	0.0482851	0.00753902	0.0478365	-0.050498	-0.0784195	-0.214125	0.126239
MS.275	0.476715	0.163033	0.282236	-0.739151	0.0340589	-0.0752396	-0.189284	-0.240062	-0.107196	-0.708083	-0.319271	0.0297885	-0.316897	-0.128198	-0.0547937	-0.0344365	-0.426212	-0.226813	0.0850515	0.125668	-0.503312	0.461833	0.0713647	0.434593	0.116918	-0.0849659	0.438104	0.141499	0.360802	0.410108	0.00500797	0.0338962	-0.227969	-0.0461381	0.688496	-0.224988	0.157911	0.118922	-0.297092	-0.118879	-0.215631	-0.236021	0.117805	0.634775	0.294555	-0.209654	-0.0585627	-0.026938	0.135152
Nilotinib	-0.0940053	0.0526434	0.21744	-0.0380801	-0.121079	0.249511	-0.527882	0.0292809	0.18548	0.0832509	-0.0650902	-0.0112906	0.131053	0.170703	0.330523	0.153888	0.17968	-0.207575	0.0601103	0.0753805	-0.468569	0.0890628	-0.0613707	-0.102299	0.149088	-0.179725	-0.303167	0.265508	0.14058	-0.000378279	-0.318852	0.116859	-0.168245	0.226813	0.0439844	-0.278116	0.15095	0.154837	0.082913	-0.0162953	0.381049	-0.226986	0.0719863	-0.131153	0.0261616	-0.142852	0.0738685	-0.00957049	0.178156
NSC.87877	-0.06978	0.014574	-0.0675973	-0.0802336	0.13352	-0.0045457	0.0785494	-0.194057	0.025352	0.0861362	-0.0910854	0.0958623	-0.00827749	-0.0393453	0.107504	-0.0815075	0.00289873	0.000436838	-0.0590684	-0.172567	0.0964873	-0.133435	0.0538734	0.0748867	-0.0927294	-0.00167173	0.0849092	-0.050974	-0.146324	0.108318	0.0703245	0.101252	0.0651224	-0.0108709	0.00172873	0.0765857	-0.0933841	-0.00742515	-0.0644848	-0.0438773	0.00577381	0.103017	-0.089126	-0.0207247	-0.0535338	0.0744734	0.0659371	0.0700522	-0.0672506
NU.7441	0.0858866	0.00944909	0.0617677	-0.0520266	0.0561108	0.0599362	-0.311959	-0.0906494	0.155128	0.0103441	0.0533347	-0.0106172	-0.194086	0.0459701	-0.0727593	-0.0525472	-0.125883	-0.163123	0.16517	0.0411703	-0.1559	-0.0286561	-0.158122	-0.0132296	0.0473867	-0.0265006	-0.0815411	0.140153	0.0888903	0.00846374	-0.0234854	-0.102835	-0.085173	0.0261828	0.0772977	-0.124318	0.00278993	-0.0112854	0.0838223	-0.152146	0.177344	-0.14744	-0.172454	0.00932158	-0.0250944	0.0497597	-0.0703528	-0.154138	0.111164
Nutlin.3a	-0.246249	0.57495	-0.4076	-0.606492	0.141061	0.50409	0.233772	0.0118046	0.607056	0.768606	-0.173568	-0.207493	0.140279	-0.329196	0.375388	-0.135201	-0.0511099	-0.423173	0.964659	0.154102	0.0572021	0.22843	-0.524374	-0.191639	0.409994	-0.0273628	-0.190132	0.715043	-0.347638	-0.408635	-0.388334	-0.721638	-0.554196	-0.00932323	-0.134423	0.355272	-0.368141	0.0626455	-0.40484	0.163689	1.13123	0.298811	-0.142461	0.159457	-0.171806	-0.540233	0.540568	0.193639	-0.28145
NVP.BEZ235	0.148665	0.141991	0.241173	0.0820674	-0.228393	0.0657148	-0.201233	-0.504264	0.241311	0.363737	-0.362221	-0.240802	0.0455821	-0.1782	-0.0509782	-0.405603	0.228043	-0.0873887	0.376906	0.0511146	-0.090835	-0.101236	-0.347827	-0.00416126	0.566543	-0.0375449	0.0443702	-0.108379	-0.37247	0.403728	-0.0849523	0.123348	-0.14946	-0.000741166	0.107221	0.0327411	-0.0536485	0.239943	-0.139103	-0.0463939	0.176139	0.0831188	-0.0966412	0.0151022	0.268959	-0.066119	-0.00159146	-0.286008	0.323668
NVP.TAE684	0.217699	0.0860417	0.112596	-0.23281	0.126333	-0.0389606	-0.220804	-0.00529645	0.078995	-0.382268	-0.110585	0.0303858	-0.0860182	0.059064	-0.0173423	-0.294812	-0.0558929	-0.00214714	0.146494	0.109919	-0.282684	0.00947529	-0.0268868	0.0627144	0.0767023	-0.0655245	0.344295	0.046004	0.0635075	0.160449	-0.0323489	0.125692	-0.132969	-0.0162816	0.210279	-0.0452467	0.0570965	0.0155737	-0.146607	-0.0218132	-0.0691284	-0.119854	-0.00416712	0.148214	0.134573	0.0589534	-0.0102572	-0.117163	0.161914
Obatoclax.Mesylate	0.247423	-0.760538	0.554203	-0.0653666	0.359611	-0.673212	-0.0582029	-0.54768	0.144933	-0.606331	-0.0706628	-0.435822	0.0971052	-0.446276	0.00943254	0.299169	-0.0335498	-0.0083786	0.370099	-0.367111	0.0474357	0.0154502	0.143785	0.40367	0.24329	0.385494	0.10898	-0.277138	-0.16506	-0.151539	0.72136	-0.434238	0.282074	-0.422272	0.218405	0.373296	-0.189658	0.0139825	-0.262127	0.000299052	0.348269	0.50389	0.0398289	0.106162	0.716531	0.220346	-0.007467	0.166399	-0.148818
OSI.906	0.424187	-0.0806789	0.34825	-1.06152	0.474116	-0.0804188	0.402147	-0.11332	-0.576587	0.516929	0.0609862	-0.331654	0.562518	-0.39289	-0.0242221	-0.0201845	0.0118064	0.258427	-0.196166	0.11439	0.224259	0.0438728	0.493654	-0.0878994	0.237944	-0.393792	0.437442	-0.314765	-0.25369	-0.0966528	0.174115	-0.0302309	0.0751098	0.120335	-0.109784	-0.169111	0.577942	0.51891	-1.13915	0.628471	-0.451718	0.479949	0.302367	0.108165	-0.22641	0.395636	-0.0265875	0.647283	-0.0684213
PAC.1	0.082336	-0.60544	0.488155	0.0830633	0.0919591	0.0867259	-0.055498	-0.0491942	0.000165033	0.348031	0.0724291	0.00723687	0.344988	0.186526	0.0907447	0.0156472	-0.0052539	-0.227035	0.280973	0.131095	-0.580091	0.387442	0.01814	-0.30285	0.213418	-0.271556	-0.363901	-0.0907329	0.119472	-0.116823	-0.290898	-0.199395	-0.110019	0.228018	0.09961	-0.0202522	0.0205942	0.0327027	0.0156821	0.151075	0.156746	0.250246	0.211829	0.289978	0.387298	-0.186669	0.336167	-0.113843	0.345282
Paclitaxel	0.269032	0.0958292	0.563116	-0.401196	0.152402	-0.501541	-0.536953	-0.35594	0.494774	-1.73323	-0.548474	-0.04561	-0.460191	-0.0659582	0.139747	-0.832821	-0.107961	-0.271452	0.522619	-0.189973	-0.548192	-0.0355427	-0.444846	0.385284	0.227012	0.200966	0.906456	0.135405	0.0620947	0.643314	-0.0869579	0.319051	-0.143097	-0.256374	0.572004	-0.29305	0.220057	0.255471	-0.0395851	0.140511	0.0761439	0.175614	-0.0626922	0.954466	1.084	0.142136	0.00266409	-0.473585	0.0376565
Parthenolide	0.0653253	0.0730984	0.00841487	0.0150754	0.0853841	-0.00712812	-0.121329	-0.0105066	-0.00553502	-0.123286	-0.0189682	-0.0109968	-0.0496449	-0.0256168	-0.0260683	-0.0578717	-0.0508977	-0.0339381	0.0334945	0.0330039	-0.0555562	0.00792131	-0.0551374	0.0222637	-0.0061308	-0.022783	0.0603295	0.0150251	0.0324455	-0.00798766	-0.00322653	-0.0646431	-0.0506187	-0.0109616	0.043254	-0.0390698	0.0152721	0.000242103	-0.0139003	0.00272311	0.0587865	-0.0610662	-0.0893372	0.1318	-0.00471485	0.0629269	0.0106564	-0.011042	0.00459114
Pazopanib	0.35297	-0.0159388	0.168498	-0.0387305	0.270228	0.0704905	-0.714638	-0.399639	-0.0730223	0.187162	0.0342634	0.112256	0.0646152	-0.0638574	-0.249809	-0.349243	0.0106497	-0.0211748	0.0664538	0.310657	-0.33344	-0.0827606	-0.209261	-0.153411	0.308921	-0.148997	0.308073	-0.0275628	0.177056	0.439265	-0.0516326	0.0887699	-0.149299	0.00192183	0.247909	-0.0968341	0.107584	-0.0230597	-0.116074	-0.228945	-0.151919	-0.0132249	0.0885362	0.144782	-0.0874802	0.149961	-0.132964	-0.339815	0.192323
PD.0325901	0.288476	0.310415	0.303702	0.528369	-0.492553	0.512033	0.772845	-0.370094	0.793594	-0.511109	0.0403751	0.0390182	0.0656598	-0.248743	0.23134	-0.295617	0.469078	-0.270172	0.757649	-0.243154	-0.604054	0.110106	-0.348098	0.12682	-0.16119	0.459083	-0.00241739	0.136903	-0.515363	0.311318	0.303991	-0.478022	-0.0619727	-0.194725	0.381879	0.267149	-0.439608	-0.304117	0.0541062	-0.112437	1.06972	-0.265514	-0.183861	-0.136238	0.265603	-0.54728	0.41551	-0.299716	-0.385683
PD.0332991	-0.12318	0.116683	0.486385	0.326024	-0.926006	0.688891	0.0657498	-0.0894145	0.931179	0.263571	0.133401	-0.812023	0.648789	-0.0375924	0.396911	-0.347215	0.760446	-0.449275	0.688014	0.396238	-0.677636	0.430822	-0.438747	-0.226014	1.10826	0.0288528	0.0623917	0.658121	-0.412606	0.5261	-0.189016	0.0210374	-0.463038	-0.236504	-0.273793	-0.134983	-0.181872	-0.149493	-0.0877399	0.873487	1.33952	-0.380183	0.342571	-0.717815	0.211506	-0.466113	0.580166	-0.460002	-0.944608
PD.173074	-0.0363019	-0.0608672	-0.118375	-0.228724	0.0476477	0.062828	-0.499177	-0.0808369	0.0161251	0.105565	0.012261	-0.146086	-0.00642607	0.138681	0.0595897	0.0980068	-0.177036	-0.0855386	0.265755	-0.109884	-0.301003	-0.0214164	-0.194684	0.0302981	-0.112871	0.096947	0.108517	0.259703	-0.0114467	-0.0199379	0.0502701	-0.311775	0.169517	0.10435	0.321824	-0.00859654	-0.107617	-0.0543306	0.191237	-0.31044	0.0477146	-0.201974	-0.194105	-0.0111023	-0.202593	-0.00886997	-0.0769469	-0.346057	0.245881
PF.02341066	0.33852	0.237392	0.381148	-0.0272151	-0.0904656	-0.0889257	-0.500604	-0.0477324	-0.0571168	-0.193717	-0.147722	0.00857637	-0.206121	0.156819	0.208969	-0.218822	-0.0153159	-0.261707	0.0100653	-0.0250019	-0.558384	-0.100553	-0.203965	0.0141221	0.0730691	-0.178917	0.374794	0.228881	0.0666049	0.156749	-0.0694994	-0.0374437	-0.330361	-0.0281654	0.533224	-0.15768	0.0188729	0.10741	0.121163	-0.0492462	-0.100722	-0.44881	-0.0629994	0.386761	0.0671866	0.0361433	0.0249768	-0.462321	0.0908695
PF.4708671	0.0327617	0.16167	-0.0977222	0.0162363	0.0495102	-0.0360127	0.131425	-0.0385967	0.0218341	0.18942	0.00550011	-0.0273332	0.0419397	-0.0909623	-0.101327	-0.131339	-0.0193704	0.0405659	0.11856	-0.123946	0.141597	-0.188961	-0.0776849	-0.033745	0.0612632	0.00579194	0.0514528	0.00228449	0.0116774	0.0542643	0.00208089	-0.00934868	-0.0110422	0.00532001	-0.00812381	-0.0456809	-0.0691724	0.0938708	-0.013259	-0.123081	-0.11736	0.081825	-0.11423	-0.0888157	-0.0690501	-0.000742192	-0.0713561	-0.0302273	0.0592506
PF.562271	-0.448394	-0.417533	0.393997	0.172663	-0.197533	-0.0561335	-0.447102	-0.170763	0.287588	-0.365853	-0.110201	-0.137931	0.0663626	0.030308	0.394913	0.00925003	0.473264	-0.163119	0.11274	0.0629505	-0.366083	-0.0630987	0.0713352	0.0487442	-0.00855134	0.0740667	0.194238	-0.1847	-0.413226	0.201055	0.131723	-0.0552116	0.255775	-0.160915	0.369689	0.219812	-0.0207356	0.0136107	-0.164085	0.210855	0.344026	-0.0304411	-0.03512	0.00724119	0.451517	0.163303	0.243733	-0.297792	-0.129082
PHA.665752	0.13593	-0.0463161	0.0740612	0.0325808	-0.0337624	0.00875156	-0.197429	0.129422	-0.0216886	0.0934352	-0.0871462	-0.0811055	0.120216	-0.0329244	0.0554382	-0.168693	0.0321694	0.05367	-0.0374979	0.110581	-0.0633333	0.0997724	-0.0951175	-0.0327049	0.0483667	-0.107774	0.128307	0.0768566	-0.111238	0.0791099	-0.00520101	0.048194	-0.0918919	-0.0107242	0.0915992	-0.0425307	-0.00259612	-0.00785412	-0.0238808	0.0429751	-0.096025	0.0579705	-0.0425928	-0.0769216	-0.0135889	-0.00118571	0.0816994	-0.199868	-0.0197515
PLX4720	0.0364729	-0.165966	0.111791	-0.216176	-0.182632	0.247015	-0.164922	-0.289963	0.259662	-0.523522	-0.00520356	0.28367	0.433416	-0.249933	0.14345	0.355051	-0.320102	-0.283946	-0.259455	0.47422	-0.364649	0.0323858	0.0274442	0.00241258	-0.0282322	-0.418481	-0.153991	-0.0887962	-0.053555	0.220322	-0.229776	0.209738	-0.267304	0.140916	0.192148	-0.0687432	0.447271	0.243667	0.122719	0.0168263	0.256155	0.220036	-0.0887597	-0.0757891	-0.0970794	0.0265571	0.10516	0.00140097	0.366914
Pyrimethamine	0.0213369	-0.244707	0.175458	0.0972949	-0.238217	0.0582961	-0.370836	-0.209456	0.221287	-0.483152	-0.049056	0.105503	0.0749808	0.216367	0.162646	0.287331	0.162039	-0.140776	0.0395233	0.010937	-0.402512	-0.0867682	0.157815	0.208478	0.0512207	0.0289804	0.0892034	0.111072	0.0351548	-0.0151873	-0.00827207	0.0161478	-0.0231137	0.00783294	0.290028	-0.0875018	-0.150875	-0.0667384	0.17136	-0.183388	0.312774	-0.076941	0.193511	-0.16766	0.149358	-0.304931	0.361566	-0.204952	0.131347
QS11	-0.283633	-0.540717	0.305951	0.0972304	0.180169	-0.246677	-0.301972	-0.460281	-0.015432	-0.1369	-0.000697697	0.0700258	-0.0539276	0.0635905	-0.220567	0.32871	0.168642	0.0992687	0.131717	-0.407466	-0.0562459	-0.267215	0.366826	0.420397	-0.134122	0.336532	0.326431	-0.553001	-0.145778	0.194554	0.359296	-0.499472	0.283461	-0.318683	0.404442	0.240774	-0.208347	-0.119216	-0.156878	-0.393578	-0.105809	0.268212	0.222561	-0.0332047	0.428698	0.0875377	-0.171444	-0.338014	0.233022
Rapamycin	0.289046	0.0806613	0.0257888	-0.0671515	0.0434666	-0.235296	-0.106972	0.17263	-0.113073	-0.40175	-0.123574	0.0517715	-0.177198	0.214354	0.133258	-0.0946972	0.00375227	-0.154964	-0.0505984	0.0272514	-0.280011	0.161039	-0.116403	-0.0423832	-0.0677907	-0.0253213	0.124356	0.119081	0.170701	-0.0245114	-0.166278	0.0956759	-0.104613	-0.0584113	0.142608	-0.226087	-0.0590652	0.102764	0.203149	0.0222605	-0.0868596	-0.128698	-0.0236843	0.271557	0.112838	-0.127879	0.141631	-0.182388	0.0826322
RDEA119	0.0591125	-0.333552	0.4034	0.786541	-0.374807	0.656621	0.382507	-0.575794	0.710636	-0.713388	0.0580818	0.23496	0.298545	-0.000473488	0.306657	0.0390163	0.62334	-0.458671	0.355611	-0.530598	-1.01466	-0.0832226	-0.312931	0.177031	-0.0374221	0.574627	0.0410301	0.161686	-0.579239	0.0531489	0.425555	0.081004	-0.577024	-0.183305	0.928575	0.402411	-0.0978201	-0.512681	-0.0165025	-0.270242	0.759306	-0.470456	-0.0137467	-0.268252	0.00585294	-0.211796	0.37262	-0.421317	-0.0742882
RO.3306	-0.00825417	0.226138	-0.0461977	0.0268091	-0.0594041	0.295976	-0.47158	-0.20322	0.0951013	-0.640771	-0.0846924	-0.0256831	-0.0697921	-0.0264671	-0.104124	-0.156396	0.0327337	-0.0541851	0.0226649	0.37908	-0.0586695	0.21088	-0.116534	-0.00636882	0.219741	0.0684708	-0.0634196	0.0448522	-0.0234561	0.253839	-0.206425	-0.146164	-0.109702	-0.0806866	-0.16109	-0.0773259	0.0168885	0.0581279	0.0298021	0.269381	0.440917	0.141057	-0.112644	0.109208	0.105641	-0.109087	0.173533	0.0357718	-0.00870069
Roscovitine	0.0413006	-0.00314335	-0.0364284	-0.0127646	0.0015818	-0.0144486	-0.022468	0.0263666	0.000767256	-0.0693571	0.0238067	-0.0100942	0.000928365	-0.0179111	-0.00704588	0.00552826	-0.00286896	-0.0327945	0.0302664	0.0479802	-0.0888068	0.0600052	0.000189835	0.0253643	-0.0215324	0.015259	-0.000386695	-0.00491454	0.0358039	0.0239661	-0.0169611	-0.0632187	0.00670823	-0.00141517	0.0178106	0.00298497	-0.00171426	-0.0145642	0.00858412	0.0137881	0.0329167	-0.039364	-0.0167031	0.0656801	0.0402256	-0.0307503	0.0279996	0.0482836	-0.00921185
Salubrinal	0.139333	-0.0365829	0.0717562	0.0566921	-0.245882	-0.0757385	-0.0908736	0.0265568	0.00140363	-0.0489671	0.00668146	-0.121761	0.155192	-0.0955085	-0.0191925	0.0257627	0.0668243	-0.131928	0.0286526	0.21297	-0.206732	0.144914	-0.0572826	0.0165441	-0.0268082	0.0140464	-0.0233589	-0.0304877	0.0805862	0.184326	0.0499051	-0.0360579	-0.0324551	0.0123874	0.037254	-0.018196	0.00257382	0.00729174	0.114377	0.12819	0.0305465	-0.111122	-0.0167653	0.0658461	0.0854821	-0.110023	0.121621	-0.00729587	0.0120498
SB.216763	0.0388103	0.224207	-0.0277354	0.0765787	-0.21579	0.0994557	-0.503993	0.192141	-0.0246278	-0.570598	0.0163268	-0.161029	0.179504	-0.00501902	-0.0347432	-0.045879	0.092869	-0.0262908	0.196657	0.313301	-0.446655	0.159195	-0.124883	-0.00400258	0.345937	0.074838	-0.0538076	-0.0176655	-0.0461845	-0.0485688	-0.0446544	0.000342564	-0.107589	0.0783351	0.170544	0.266535	0.344959	0.0754395	-0.0427303	0.202166	0.166382	-0.375708	-0.125732	0.208512	-0.0861749	-0.0704346	-0.000149576	0.014165	0.207322
SB590885	-0.538284	-0.146693	-0.0827172	0.140848	-0.203154	-0.0587661	0.167896	-0.268219	0.0327948	-0.218479	0.146799	0.209689	-0.0729675	0.026741	0.391986	0.359716	-0.0140633	-0.139613	-0.0991539	-0.112582	-0.267478	-0.109146	0.0455166	0.28617	-0.137449	0.308839	-0.167782	0.0450782	-0.201471	-0.206421	0.369787	-0.50426	0.306026	-0.201273	0.248643	0.199514	0.0633451	-0.0287222	0.0527642	-0.117229	0.246658	-0.330769	-0.0170484	-0.442389	0.07736	-0.563345	-0.115299	0.0336796	0.204343
Shikonin	0.012257	-0.282789	0.00276127	0.0699587	0.0888787	-0.207686	0.066521	-0.220883	-0.0168782	0.391403	-0.0751234	-0.299437	0.239396	-0.249926	0.058481	0.0688145	-0.0959996	-0.181663	0.5032	0.150419	-0.339883	0.25786	0.120346	-0.100509	-0.437335	0.0909459	-0.298736	-0.226458	-0.105561	0.215819	0.118818	-0.585526	0.0507874	-0.168368	0.183063	0.37695	-0.00501457	-0.0168789	0.0374897	0.169979	0.0193521	-0.000814623	-0.262531	0.507963	0.544752	0.412152	0.174894	0.448926	0.0318716
SL.0101.1	0.0284056	0.200376	-0.0970756	-0.279142	-0.11348	0.109531	0.0879351	-0.0247138	0.0565833	-0.447622	-0.0206801	-0.235903	0.0159026	-0.140323	0.0748966	0.109423	-0.206912	-0.319166	0.116445	0.137253	-0.077587	0.171399	0.0575775	-0.00459417	0.0982154	-0.00824918	-0.285325	0.153605	0.05973	0.0946191	-0.166547	-0.0333907	0.00888918	0.0469217	-0.168949	-0.129025	0.136219	0.0575736	0.0446714	0.0799705	0.237313	-0.0682646	-0.0934779	0.0365346	-0.133442	-0.123527	0.137662	0.230698	0.0745802
Sorafenib	0.000765787	0.0114621	0.047049	0.197123	-0.26841	0.0182946	0.0278138	-0.0602451	0.00735766	-0.127793	-0.0692838	0.172132	-0.0734143	0.0311371	0.00365506	0.0476407	0.103749	-0.0102652	-0.0689755	-0.0431234	-0.0563276	-0.047228	0.0652136	0.0901465	0.0742219	0.0705482	0.0119642	-0.0469627	-0.0216759	0.131806	0.0721642	0.0845468	-0.00508003	-0.0310284	0.0326145	0.0360457	-0.100968	-0.0923301	0.0661712	-0.0702076	0.042103	-0.069601	0.0266546	-0.0516381	0.00764486	-0.0538045	0.0385049	-0.152162	0.00739638
S.Trityl.L.cysteine	0.152471	0.0733299	0.266712	-0.307894	0.268032	-0.495496	0.0228527	-0.390475	0.0445487	-0.965167	-0.388602	0.241614	-0.242039	0.0741401	0.376404	-0.210804	-0.0608677	-0.0617415	0.225047	-0.603026	-0.186615	-0.232492	-0.223089	0.491196	-0.108274	0.120248	0.675411	0.112692	0.156553	0.0544764	0.0313159	0.0306925	-0.0902766	-0.231381	0.53512	-0.200725	-0.234106	0.164839	-0.0648055	-0.183335	-0.272512	0.16114	-0.0413572	0.385072	0.412477	0.0747022	-0.0877226	-0.272063	0.151428
Sunitinib	0.131455	-0.119779	0.880445	-0.231316	-0.447039	-0.140658	-1.04602	0.0523288	0.360045	-1.52024	-0.352729	0.00169688	-0.311688	0.37411	0.187466	-0.277246	0.0807568	-0.507317	0.01462	0.496493	-1.13337	0.211945	0.246844	0.300655	0.595746	0.148844	0.233519	0.34531	0.330533	0.328809	-0.17266	0.163178	-0.18965	-0.223709	0.277678	-0.185319	0.423032	0.0753371	-0.00529102	0.266093	0.757758	-0.520928	0.648937	0.770566	0.556451	-0.120095	-0.0247074	-0.389496	-0.253616
Temsirolimus	0.572666	0.821324	0.408495	0.594036	-0.953548	0.415487	-0.305553	0.146856	0.375515	0.403348	-0.250044	-0.232098	0.35741	0.0876457	0.240538	-0.310881	0.454074	-0.593542	0.4111	0.150766	-0.292106	-0.0290567	-0.429079	-0.447646	0.667492	-0.303603	-0.180583	0.357837	-0.210827	-0.0828992	-0.471581	0.278728	-0.717025	0.172969	-0.468182	-0.336175	-0.129915	0.410529	0.119507	0.121744	0.529185	-0.1768	-0.0455897	-0.169252	-0.0451241	-0.0563272	0.26559	-0.932156	0.145215
Thapsigargin	0.267999	-0.530738	0.402952	-0.496751	1.07719	-0.937724	-1.14719	-1.55312	-0.214913	-0.132019	-0.581211	0.208544	0.312234	-0.775697	-0.556477	-0.338219	0.619707	-0.170273	0.0173564	-0.0666428	0.0103344	-0.416834	0.605538	0.802631	1.21665	0.431038	1.40604	-1.02365	-0.830935	0.295842	1.15631	-0.201026	0.977249	-0.955091	0.279247	0.334897	0.027248	0.142084	-1.52274	-0.134455	0.219297	0.674342	-0.367562	0.76337	0.0990236	0.295532	-0.704986	0.555291	0.178508
Tipifarnib	0.293316	-0.370543	0.2323	0.0820431	0.0789223	-0.19262	0.104312	-0.0667967	0.0750941	-0.262927	-0.0400491	-0.456663	0.633234	-0.102712	0.180266	-0.103601	0.367562	0.0978437	0.126411	0.499483	-0.429731	0.477762	-0.186623	-0.241055	0.114125	-0.0980304	0.0723897	-0.513446	-0.392122	0.555948	0.0906944	-0.0437885	-0.117792	-0.156642	0.293844	0.139473	0.288564	-0.00289519	0.0216828	0.490841	0.0241284	0.248764	0.26159	0.183199	0.707318	-0.0292484	0.309843	-0.114987	0.0983102
TW.37	-0.292594	-0.0118735	0.181299	-0.0811173	-0.0190914	-0.193043	-0.234454	-0.0701806	0.00984896	-0.244292	-0.256909	0.0146037	-0.01562	-0.0722361	0.0140017	-0.199584	0.114584	-0.126756	0.373136	0.0188535	-0.375929	-0.168885	-0.321413	0.281779	0.252569	0.513732	0.00609775	0.0993024	-0.114906	0.0271808	0.30432	-0.010796	0.051684	-0.203729	0.175112	0.17962	-0.265721	0.102423	-0.00922616	-0.221601	0.0486344	0.0791831	-0.166697	-0.0878963	0.310656	-0.0266035	-0.257441	-0.218947	0.170619
Vinblastine	-0.195564	0.0859849	0.835092	-0.129643	-0.105784	-0.241063	-1.29314	0.423943	0.0871479	-0.629264	-0.189649	-0.335338	-0.56814	0.201865	0.167592	-0.474401	0.515182	-0.142283	0.266791	0.190518	-0.319686	0.193005	-0.180926	0.128504	0.585309	0.57719	0.0408577	-0.0521016	0.298074	0.165625	0.00852543	0.315025	0.272657	-0.161012	0.0516719	-0.185746	-0.372363	-0.00288362	-0.0324518	0.169114	0.823302	-0.243309	0.127572	-0.103952	0.794067	0.306785	-0.105089	-0.60935	-0.0883147
Vinorelbine	-0.468488	-0.46005	0.26751	-0.262829	0.160543	-0.541532	-0.683048	-0.439415	0.141941	-0.327433	-0.345048	-0.00756897	0.291361	0.0900476	0.448862	0.0602658	0.262042	-0.00144457	-0.0930708	-0.215542	-0.543574	0.165603	0.116272	0.0953685	-0.399858	0.159418	0.400432	-0.733735	-0.431673	0.432059	0.247514	-0.0759286	0.482839	-0.216425	1.06718	0.0400457	0.210102	-0.0664648	0.0812994	-0.254908	-0.588429	0.405232	0.0390408	0.34612	0.40053	0.26547	-0.0408444	-0.0956432	0.370443
Vorinostat	-0.199867	-0.120841	0.190265	-0.0667915	-0.269888	0.269995	-0.343444	-0.0167887	0.0148135	0.117245	-0.143569	0.0134442	0.0186201	0.196063	0.0950529	0.0175224	0.203939	-0.116101	0.12872	-0.262266	-0.183816	-0.128229	-0.0838193	0.20799	0.456683	0.325535	0.166754	0.0536229	-0.206629	-0.022725	-0.0283554	-0.350317	-0.0372627	0.00718529	0.116786	-0.0109673	0.0484223	0.00176719	-0.261952	0.0601989	0.365345	-0.0253769	0.204506	-0.286117	0.0451474	-0.0588768	-0.176821	-0.509207	0.00713303
VX.680	0.126437	0.0871153	0.675764	-0.424076	0.0411963	-0.24459	-0.446131	-0.323572	0.319457	-1.13443	-0.56879	-0.0214561	-0.31961	-0.059128	0.355655	-0.538069	-0.176203	-0.368297	0.307496	-0.130155	-0.623811	-0.12224	-0.322821	0.241393	0.472557	0.21787	0.512782	0.306595	0.103716	0.519488	0.0596115	0.30309	-0.139605	-0.211514	0.478217	0.00898036	0.290394	0.146501	-0.091656	0.0815556	0.237259	-0.0846868	0.137449	0.667503	0.716587	0.0396239	-0.256386	-0.686868	0.142201
VX.702	-0.208799	0.0156397	0.14008	0.0293801	-0.317021	0.143803	-0.229063	0.0741594	0.016913	-0.241889	-0.00813416	-0.0682943	-0.0594724	0.226226	0.19617	0.0425496	0.10022	-0.0948226	-0.0265322	0.0549726	-0.296262	0.00252444	-0.0584384	0.0365765	0.182767	0.121755	-0.150035	0.164953	-0.0802327	-0.151991	-0.141432	0.0326226	-0.0534388	-0.0284595	-0.054446	0.115222	0.142282	0.11319	0.214267	0.158116	0.16413	-0.248385	0.212381	-0.19344	0.0283364	-0.252755	-0.0312342	-0.145599	0.0735212
WH.4.023	0.533313	0.333058	0.598247	0.189103	-0.171058	0.128912	-1.17349	-0.954875	0.338151	-0.340711	-0.354992	-0.214546	-0.0884824	-0.133386	0.124854	-1.18034	0.229307	-0.00999851	0.726846	-0.042854	-1.05499	-0.308631	-0.615463	0.062216	0.623461	0.188955	0.915741	-0.0431978	0.248698	0.670576	0.243807	-0.322377	-0.390371	0.0777607	0.54431	0.247646	0.508039	-0.00104617	-0.16506	-0.262727	0.184817	-0.16122	-0.10985	0.514194	0.420399	0.262114	-0.105812	-0.776807	0.0927829
WO2009093972	0.237237	0.280601	-0.287911	-0.206643	0.282463	0.225218	-0.175794	0.122129	0.088728	0.298555	-0.0461112	-0.0622912	0.319401	-0.178221	-0.0860772	-0.440513	-0.183764	-0.103803	0.492933	0.332409	-0.0708336	0.092539	-0.403503	-0.0811908	-0.0332111	-0.0813901	0.169811	0.00739681	-0.104334	0.34196	-0.0883412	-0.307102	-0.139485	0.2219	0.128139	0.00937007	-0.181146	0.113885	0.0930937	-0.112566	-0.00312959	0.0596313	-0.682566	0.214256	-0.118176	0.33105	0.0468037	-0.0583239	0.0995622
WZ.1.84	0.349487	0.117602	0.500312	0.195243	0.240983	-0.0114341	-0.521796	-0.24364	0.430064	-0.420415	-0.0540528	-0.0403047	-0.24177	-0.122236	-0.0455772	-0.802654	0.218641	-0.405985	0.37646	0.177626	-0.272823	-0.490221	-0.270952	0.00131042	0.65617	-0.152219	0.235483	0.0675992	0.112062	0.417485	0.0337142	0.237264	-0.189988	-0.0376436	0.14265	-0.0342928	-0.0188543	-0.0186117	-0.333722	-0.0396852	0.359331	-0.111821	0.0393667	0.467516	0.486411	0.304648	-0.0144733	-0.136252	-0.123992
X17.AAG	-0.116494	-0.35218	0.399064	-0.321935	0.391562	0.577346	-1.51072	-0.420295	0.93623	-2.26295	0.186332	-0.140641	0.249162	-0.369409	-0.112051	0.300741	-0.569733	0.0708648	1.43369	-0.0298999	-0.45268	-0.374287	-0.0504902	0.613237	-0.701942	0.211332	0.59094	-0.0995781	-0.385292	1.05541	0.00113843	-0.13161	0.257936	0.363329	1.33723	0.420901	0.0801906	-0.587631	-0.351335	-1.09749	0.164701	-0.187759	-0.66538	0.43142	0.321296	0.675918	-0.0499419	-0.600017	0.565175
X681640	-0.214896	0.068491	0.20879	-0.250057	-0.134983	0.203068	-0.07453	-0.333208	-0.0491596	-0.00560052	0.0389351	-0.00324359	0.210687	-0.0509665	0.332489	0.507089	-0.0187329	-0.284988	-0.24637	-0.471792	-0.248763	0.0192175	0.148055	0.0608781	0.168756	-0.0705321	-0.0643663	-0.183362	-0.0858478	-0.320248	-0.169778	-0.79317	-0.191066	0.147896	0.249694	-0.488889	0.252838	-0.240043	-0.0192645	-0.152159	0.340313	-0.0673177	-0.156191	0.15262	-0.216675	-0.409978	0.189097	0.119806	0.252806
XMD8.85	0.212971	-0.254681	0.294014	0.119333	0.0433595	-0.10604	-0.738765	-0.0886478	0.129188	-0.294815	0.00772823	-0.0996915	0.231711	0.0599158	0.0788774	-0.0688031	0.0513534	-0.243569	0.0463524	0.310348	-0.577713	0.101676	-0.207655	-0.15637	0.0232534	-0.222172	0.0598916	0.0794781	0.0307898	0.177767	-0.0647389	0.0869151	-0.224399	0.0168099	0.445943	-0.143867	0.264778	0.0398088	0.113534	-0.0522169	0.0126968	-0.3035	0.117142	0.465158	0.0390472	0.103109	0.0522543	-0.276675	0.266656
Z.LLNle.CHO	0.328068	-0.0691542	0.20853	0.348978	-0.180385	-0.238088	-0.0079563	0.126346	0.159528	-0.278304	-0.00738172	-0.0570691	-0.141602	-0.0591794	0.090591	-0.120223	0.0881722	0.00117504	0.00535116	-0.00805504	-0.258979	0.0491347	-0.302805	-0.169908	-0.127059	-0.147703	-0.103027	-0.167915	0.0861869	0.0483691	-0.122314	0.283498	-0.15594	-0.0126125	0.204728	0.100025	-0.0564174	0.0243618	0.031307	-0.2003	-0.225814	-0.0512478	0.0613547	0.271404	0.219744	0.138914	-0.0115263	0.12917	0.292851
ZM.447439	-0.157606	0.11739	0.543093	-0.355445	-0.37893	0.0864964	-0.995314	-0.169104	0.354894	-0.897709	-0.178337	-0.539771	-0.093657	0.0763801	0.00352458	-0.765989	0.125063	-0.523355	0.723113	0.46645	-0.522118	0.259978	-0.766521	-0.0522578	0.57053	0.318608	-0.262989	0.400751	0.00324475	0.464237	0.116062	0.00685663	0.238248	-0.015259	0.294722	0.358291	-0.55297	-0.113175	0.0816079	0.379518	0.481613	-0.161133	-0.211969	0.134565	0.534722	-0.138876	0.177636	-0.506921	0.356258
[truncated: 5,000 more columns]
