# Supplementary material for: Discovering novel pharmacogenomic biomarkers by imputing drug response in cancer patients from large genomics studies
Source: HighWire-hosted journal article supplement (doi:10.1101/gr.221077.117), 2017-08-28
Supplement: Supplemental_Table_S10.xlsx [file Supplemental_Table_S10.xlsx]

## Sheet: Supp Tab 10
Supplementary Table 10: Imputed drug response for all TCGA drugs across all available patients, corrected for GLDS (see script "models_on_all_TCGA.R").
IMPORTANT NOTE: reliability of these predictions will vary, please cross reference with Supplementary Table 6 for estimates of reliability from cross-validation. However, this does not guarantee accurate imputed values in TCGA. We recommend only considering drugs with a Spearman's correlation of >0.3 from cross-validation. Also, please strongly consider the other caveats outlined in the Results a…
	A5J1	A5J2	A5J3	A5J5	A5J6	A5J7	A5J8	A5J9	A5JA	A5JB	A5JC	A5JD	A5JE	A5JF	A5JG	A5JI	A5JJ	A5JK	A5JL	A5JM	A5JO	A5JP	A5JQ	A5JR	A5JS	A5JT	A5JV	A5JW	A5JX	A5JY	A5JZ	A5K0	A5K1	A5K2	A5K3	A5K4	A5K5	A5K6	A5K8	A5K9	A5KO	A5KT	A5KU	A5KV	A5KW	A5KX	A5KY	A5KZ	A5L3
A.443654	0.00921589	-0.00508431	-0.0548293	-0.185532	0.0485091	-0.0389696	-0.0260858	-0.0850017	0.00579041	-0.0891116	-0.0285546	-0.00917234	0.0164559	-0.0219692	-0.0632256	-0.0763255	-0.0648069	-0.00664714	0.00873228	-0.0639302	0.00751888	-0.130722	-0.0376705	-0.0147551	-0.0313341	-0.0056533	0.0413012	0.00197581	-0.0393228	0.0288567	0.0285461	-0.0128898	0.016514	0.0330043	-0.0113192	0.026256	0.0420046	0.039188	-0.113408	-0.0441242	-0.0524119	0.0209223	-0.026526	-0.0161534	-0.0382209	-0.0401373	-0.0474184	-0.0896028	-0.00854873
A.770041	-0.119734	0.290137	-0.123922	-0.0283992	0.019373	0.201919	0.086944	-0.100372	0.172148	-0.304172	-0.105768	0.195371	0.0599263	0.0133144	0.261472	0.00802268	-0.1135	0.0755884	0.0923561	0.170623	0.145958	-0.172871	0.240474	0.197898	-0.108663	0.171029	0.0231833	-0.133879	-0.165136	0.132446	0.152933	-0.357549	0.0928197	0.0126442	-0.0535034	0.201025	0.115748	-0.0713258	-0.0622206	-0.084087	0.0705042	0.171736	-0.0957581	0.202287	0.0115543	0.233406	-0.0391917	0.024966	-0.103989
ABT.263	0.261704	0.0024836	0.0219263	0.281735	0.184181	-0.151256	-0.122022	0.330126	-0.0146115	0.447454	0.0560967	0.0794725	-0.167277	-0.0325843	-0.17435	-0.121988	0.360107	0.0686005	-0.285486	-0.000154912	-0.131141	0.184819	0.054881	0.0847252	0.134307	0.246666	-0.0945863	-0.165697	0.354466	0.211682	-0.185333	0.111795	0.0261464	0.0973893	-0.288523	0.174505	0.0922688	0.14096	0.0082771	0.0782159	0.433182	-0.220164	0.279039	0.00116859	0.0999788	0.149345	-0.464402	0.100871	-0.14193
ABT.888	0.0657991	-0.027618	-0.0444143	-0.0337794	0.0249919	-0.0746491	0.0455651	-0.00662867	-0.0129358	0.0552372	-0.00274375	-0.0386343	-0.0173537	-0.0150709	0.0208289	-0.0271355	0.0433823	-0.0526737	-0.0227483	-0.134635	-0.00961825	-0.0375103	-0.0322928	-0.0303135	-0.0193935	0.0406347	0.0372923	0.0110916	0.0211346	0.0211024	0.00467768	-0.00531376	0.00111638	-0.0202823	-0.0671254	0.0125051	-0.0312091	0.0559917	0.00123318	-0.0956763	0.0434045	-0.0733647	0.00067425	-0.0746781	-0.00410581	-0.0250177	-0.0750162	-0.0838622	-0.0235824
AG.014699	0.213436	0.0999065	-0.110232	0.270879	0.168626	-0.0473872	0.226674	0.0140881	0.240294	-0.220755	0.273889	0.1614	-0.051613	0.354808	0.0356694	0.166801	0.195847	0.188711	0.181647	-0.211836	0.0416112	-0.109847	0.145998	0.161979	-0.286005	0.205251	0.18438	0.278187	0.187828	0.0861187	0.0941098	0.386999	0.12948	0.0611171	0.247589	0.0988785	-0.134986	0.0863711	0.510807	-0.0643371	0.0110378	-0.0593156	0.218774	-0.117506	0.176214	-0.0047049	0.106249	0.171437	-0.11511
AICAR	0.236853	-0.243777	0.0925297	0.348005	0.127302	0.356579	0.125084	0.248367	0.367138	0.163045	0.0350408	0.109688	0.421143	-0.154134	0.000282934	0.106711	0.25191	-0.0142533	-0.0308043	0.485542	0.160642	0.121677	0.313635	0.0794944	0.826249	-0.462667	-0.00332786	-0.265073	0.180708	-0.0763235	-0.330873	-0.273928	-0.15046	0.157109	-0.139017	-0.277966	-0.0674071	0.20883	-0.338223	0.26637	0.337345	0.110806	0.293536	-0.16865	-0.0781905	-0.147088	0.0327783	0.449527	0.341356
AKT.inhibitor.VIII	-0.270472	-0.217333	-0.318524	-0.181298	-0.24697	0.0357225	0.183041	-0.267938	-0.185089	-0.0164859	-0.199527	-0.411187	0.0692479	-0.353731	0.00898762	-0.290226	-0.165268	-0.110407	-0.0394586	-0.33017	-0.252971	-0.15104	-0.357911	-0.290497	-0.219254	-0.113018	-0.119617	-0.162293	-0.290157	0.00109511	-0.304226	-0.0579537	-0.198829	-0.0460157	-0.106826	0.0783303	-0.270964	-0.24442	-0.256014	-0.6072	-0.419746	0.075497	-0.0651856	-0.0423636	-0.0549495	-0.220083	-0.18098	-0.389651	-0.404103
AMG.706	0.0150909	-0.0378169	-0.0616399	0.0617068	0.00922089	0.153472	0.0193816	0.0905657	-0.0420187	-0.00905165	-0.00107895	0.0172057	0.0647587	-0.00664645	0.0247222	0.0506939	-0.0225177	-0.12666	0.0606815	0.0966497	-0.00378014	0.131159	-0.0821426	0.03779	-0.0440221	0.0210578	0.0696855	0.0312106	-0.0217118	-0.0489944	-0.0531438	0.0630726	-0.00809558	0.0773113	0.0147085	0.0399424	-0.00596827	0.0148703	0.00804126	0.0649021	0.0382646	0.00874436	-0.0401189	-0.0385763	-0.0655917	0.0669934	0.0432131	-0.0974151	0.0453945
AP.24534	-0.15522	-0.177833	0.0757851	-0.298427	-0.0867981	0.192133	-0.0769555	-0.0460076	0.316746	-0.461577	-0.133938	-0.0571818	0.268366	-0.0189562	0.353981	-0.135479	0.00268016	0.162776	0.341515	0.195045	-0.357114	0.00551332	-0.0197763	-0.075172	-0.0724336	-0.145957	-0.143836	0.0961547	-0.1309	0.234322	-0.0601723	-0.516169	-0.0433019	0.0295975	0.26374	0.141145	-0.13359	0.261042	-0.0783008	0.10982	0.0854949	0.304862	-0.359959	0.52014	0.22654	-0.0730196	0.131585	0.228348	-0.00754755
AS601245	0.159634	0.11246	0.214743	0.0266951	0.302975	0.0675669	0.147807	-0.0350654	0.258723	-0.0258543	0.109245	0.0186494	0.220668	-0.0374623	0.130573	0.125067	0.147671	-0.0446007	0.0750996	0.312333	0.0736986	0.224161	-0.0566549	0.0801477	0.190063	0.010035	0.166381	0.171176	-0.0789347	0.151447	0.023025	0.362347	0.00561858	0.192513	0.0801874	0.0312953	0.188756	0.0664105	0.114742	0.16702	-0.086824	0.0913658	0.193121	0.0923469	0.089149	0.145821	0.132567	-0.132153	0.226802
ATRA	-0.221553	0.0848985	0.00969715	-0.251464	-0.0630652	0.0355666	0.00596463	-0.124433	-0.237282	0.00490045	-0.0472174	-0.0262815	0.0205695	0.0591414	-0.0699178	-0.0637762	-0.0667391	-0.0310497	-0.0850255	-0.13141	-0.124177	-0.0880841	-0.0892086	-0.188677	-0.148223	0.119933	-0.231745	-0.0201108	-0.165259	0.0161859	0.071216	0.0595844	-0.0870534	-0.0827474	-0.0351501	-0.00838819	0.193504	-0.10765	-0.0462588	0.0170599	-0.168957	0.0378945	-0.00545353	-0.236401	-0.0541571	0.0174668	0.0239269	-0.293528	-0.0914886
AUY922	0.237812	0.0621158	0.181444	-0.168877	0.102768	-0.140255	0.0858379	-0.0360847	-0.10088	-0.0546506	-0.246456	0.107351	-0.0428798	0.00415873	0.015591	-0.0563639	-0.11196	-0.0691242	0.0600113	0.182122	0.0830345	0.0156227	0.142919	0.097762	-0.148034	-0.116039	0.0418961	-0.0907771	0.208643	-0.0451049	0.014451	0.0447044	-0.0814742	-0.00650935	0.175311	-0.173099	-0.0327229	0.153023	0.0147199	0.151683	0.260753	0.0274878	-0.0981769	0.386598	-0.0112969	0.119822	-0.0602526	0.0560515	0.250416
Axitinib	-0.0434633	0.131182	-0.0933942	-0.139786	0.0451929	-0.131051	-0.0428053	0.350672	0.108201	-0.071122	-0.0198676	0.40742	-0.185812	0.272446	-0.00666471	0.0861682	0.209651	0.212829	-0.105476	-0.150577	0.271567	0.105656	0.277226	0.449358	0.14158	0.497378	0.356859	0.0489453	0.0449951	0.125669	0.215187	-0.0653607	0.534901	0.101403	0.115103	0.405401	-0.136132	0.0925037	0.263715	0.0266944	0.178787	0.174615	0.0504327	-0.151841	0.049039	-0.0721125	-0.140397	0.02316	-0.0398975
AZ628	-0.231009	-0.147594	0.354567	0.0729213	-0.0350205	-0.446462	-0.0493987	-0.449093	-0.05066	-0.773742	-0.158088	-0.220361	-0.772209	-0.286769	-0.395209	-0.0584588	-0.551649	-0.160344	0.0556422	0.206066	0.0631276	-0.477152	-0.0243457	-0.108868	-0.61671	-0.257231	-0.171914	-0.293737	0.0376611	0.275307	-0.0994236	0.576198	-0.302477	-0.797618	-0.0810498	-0.100256	-0.462521	-0.326998	0.0910366	-0.0303606	-0.248163	-0.470738	0.103331	0.0917312	0.0859922	0.371201	-0.379928	0.0620207	-0.0204482
AZD.0530	0.0684974	0.230428	-0.0383607	-0.0827189	0.12269	0.0190777	-0.0993486	-0.00163409	0.0727248	-0.203699	0.0110142	0.108682	-0.196485	0.260043	0.1539	-0.0824212	-0.00232699	0.0709881	-0.00297199	0.190453	0.113066	-0.217032	0.188049	0.2641	-0.0176288	0.0796442	0.105616	0.0491082	0.075614	-0.240942	0.360585	-0.240066	0.128138	0.100102	0.0153591	0.18488	-0.163619	-0.0120949	0.0432588	-0.0667143	0.202504	0.179156	-0.0791004	0.0123196	0.10959	0.115727	0.0688411	-0.112008	-0.0873036
AZD.2281	0.227247	0.0479246	-0.210255	0.140052	0.0394369	0.0214213	0.130709	-0.0960801	0.0128476	0.0860899	-0.161555	-0.0700283	-0.0351264	-0.10134	-0.135794	-0.0729296	0.0536749	-0.17642	-0.277511	0.0273999	0.0633267	-0.0442935	0.052795	0.0214771	-0.140826	-0.134835	-0.0314395	-0.0893345	-0.0649694	-0.0638657	0.0235594	-0.301542	0.0270196	-0.00722117	-0.0931507	0.00252213	-0.0440098	-0.172062	0.0504618	-0.161175	0.0269516	-0.0239939	-0.195266	-0.14623	-0.246052	0.00427224	0.00284356	0.157096	-0.332217
AZD6244	0.1902	0.0159209	-0.0507574	-0.286513	-0.0262815	0.111505	0.0618376	-0.0533669	0.0265042	0.342588	0.0365879	0.0843022	0.16442	0.192599	-0.05576	-0.0726347	0.261323	-0.28146	-0.110008	-0.257461	-0.320396	0.0516534	-0.129827	-0.204133	-0.199601	0.2606	-0.240797	0.106492	-0.181816	-0.0416705	-0.0455423	-0.0239002	0.00622548	0.255312	-0.0623072	-0.253383	0.009071	0.14155	0.112041	-0.330268	-0.0658475	0.044755	0.0595221	-0.189264	-0.287731	-0.242781	0.196413	-0.360896	-0.0244881
AZD6482	0.590873	0.246515	0.462536	0.0840909	0.623876	0.172026	-0.201808	0.167873	0.355352	0.263725	0.429624	0.162296	0.313113	0.487126	0.12696	0.385492	0.365695	0.133507	0.391935	0.0999696	-0.03103	0.460953	0.262537	0.179581	0.278328	0.317771	0.350777	0.486568	0.234602	0.262491	0.382792	0.000847457	0.382429	0.393298	0.397188	0.0376605	0.36662	0.405294	0.489524	0.176949	0.124394	0.243405	0.0891807	0.0391246	0.123339	0.129095	0.391267	0.159848	0.341154
AZD7762	-0.00228528	-0.175835	-0.381601	-0.43866	-0.173642	-0.135702	-0.267159	-0.515658	-0.110363	0.365459	-0.223869	0.0344996	-0.347124	-0.299575	-0.22691	-0.137591	-0.563004	0.0744254	-0.153399	-0.194532	0.208779	-0.15259	0.0945217	-0.0464504	0.012038	0.0243872	-0.156029	-0.357937	-0.390786	0.0198948	0.109615	-0.374492	0.0180598	-0.198764	-0.0385288	-0.195657	-0.244515	-0.36927	-0.259485	-0.42199	-0.202914	-0.0219668	-0.415175	-0.430728	-0.22454	-0.189366	-0.252186	-0.0505145	-0.039999
AZD8055	0.053119	-0.00225051	0.0771496	-0.0739517	-0.0517411	-0.204608	0.0951017	-0.220964	0.0274042	-0.0818794	-0.032708	0.0727279	-0.209545	-0.200778	-0.0375026	0.00763236	-0.0980096	-0.171021	0.221654	-0.165392	-0.0978498	-0.241453	-0.0698489	-0.0458371	-0.248949	0.0582515	-0.0286473	-0.0458454	-0.0192602	0.164875	-0.128049	0.204	-0.0114246	-0.174604	-0.0789647	-0.121912	-0.0951481	0.0220189	0.0224023	-0.100392	-0.165223	-0.0760027	-0.199276	-0.108203	-0.042768	-0.0272081	-0.0745053	-0.0644776	0.124335
BAY.61.3606	-0.310558	-0.000774911	0.150418	0.0061398	0.17911	0.244397	0.0209171	-0.444309	0.0187318	-0.340757	-0.347378	-0.0397273	-0.280511	-0.124502	-0.105693	-0.0460115	-0.222562	-0.361656	-0.0746331	0.0500487	0.0435896	-0.35887	-0.322697	-0.280566	-0.232188	-0.369806	-0.317118	-0.0275888	-0.290449	-0.136557	-0.353669	-0.208068	-0.314825	-0.322885	-0.069285	-0.423944	-0.0956428	-0.0181336	-0.151383	0.0430765	0.169925	-0.0710613	-0.529821	-0.121599	-0.354237	-0.0412863	-0.0958444	0.0340307	-0.117277
Bexarotene	-0.127664	0.0602023	0.00670481	0.119866	-0.0853839	0.132684	-0.105108	0.173209	-0.108923	0.330231	0.048966	0.285557	-0.0120174	0.141409	-0.0687311	0.16974	0.183358	-0.0383879	-0.0810739	-0.0643783	0.0244675	0.117557	0.0724781	0.0821195	0.0882571	0.0742345	0.0645814	0.101701	0.184603	0.0613903	-0.00317251	0.140042	0.116319	0.0978175	0.0535163	0.0269707	-0.11232	0.123106	0.0973659	0.0904975	0.0854183	-0.121612	0.243387	-0.0878692	-0.0223257	-0.110585	0.0565507	-0.0712083	0.0803568
BI.2536	-0.0462831	-0.0141408	-0.0418612	-0.0490235	0.0202116	-0.0515728	-0.0339241	0.0129142	-0.00449539	-0.0532177	-0.0202063	-0.06025	-0.0103632	-0.0188506	-0.0151513	-0.0480456	-0.0292022	0.0525892	-0.00858824	-0.0464032	-0.00620467	-0.0547614	-0.0530173	-0.00822761	-0.014622	0.00187418	-0.00636787	-0.0163868	-0.0349998	-0.109954	-0.048648	-0.094158	-0.0257533	0.0039297	-0.0200838	-0.0167946	-0.00153815	-0.0427811	-0.0439173	-0.0322893	-0.0412894	0.00118695	0.0170129	-0.0986421	-0.0092995	-0.0355696	-0.00509232	-0.0511519	-0.0729179
BIBW2992	0.118371	0.0622692	0.11831	0.24229	0.067335	0.222633	0.049491	-0.0041686	-0.0383028	0.257176	-0.0743322	0.100987	-0.0429486	0.187475	0.0856405	0.220291	0.2143	0.0564656	-0.132135	-0.130781	0.137749	0.0778556	-0.0708622	0.0327743	0.353988	-0.0871971	0.126697	0.273283	0.0134401	0.00180114	-0.0873052	0.0779764	0.115652	0.0572231	0.201262	0.0517605	0.0268998	0.123885	0.178461	0.309034	0.286217	-0.167284	0.180588	0.00468776	-0.181277	-0.114137	0.0962965	0.441446	0.195047
Bicalutamide	0.0201278	-0.013682	0.0111912	-0.0215704	0.06512	0.0685682	0.00267621	0.0119217	-0.0269468	-0.00967287	0.00607361	0.0116157	0.0660297	0.00756479	-0.0361293	-0.0420505	0.000939107	0.00738946	0.031961	0.0664651	0.0647884	0.0495159	-0.0219823	-0.0129557	0.0730811	-0.013428	0.0244826	0.0266728	0.0126887	0.00970999	-0.00157786	-0.00737865	0.00487679	0.107068	0.00264242	0.00045281	0.0113405	0.0845498	-0.00384681	0.0904521	0.0396704	0.0397798	-0.0448495	0.046048	-0.0372175	0.0132401	0.066044	0.0412588	0.0661877
BI.D1870	-0.193653	0.00557839	-0.000268442	-0.0612901	-0.0758707	-0.053227	0.142944	-0.119814	-0.116523	-0.0205538	-0.00163524	0.12629	-0.0832712	0.0133976	-0.000268828	-0.0583095	-0.00579365	-0.14492	-0.185262	-0.00114164	-0.173539	0.0515031	-0.0209216	-0.125521	-0.00849813	0.0479114	-0.0707308	-0.10988	-0.203969	-0.0330028	0.124951	-0.197275	0.0644857	-0.141297	-0.0280743	-0.00856171	0.0152616	0.124033	-0.00388489	-0.125887	-0.113825	-0.205372	0.0254768	-0.208692	-0.0192878	-0.280723	-0.0297553	-0.132781	-0.0728
BIRB.0796	0.0345473	-0.0107779	0.00750908	-0.0364472	-0.00430447	0.0505117	-0.00283036	-0.0108517	-0.0343922	0.0508783	-0.0294883	-0.0799127	0.0580785	-0.0421219	0.0137599	-0.0421427	-0.0272409	-0.0218298	-0.0138124	0.019996	-0.0181193	0.0376055	-0.0624786	-0.0334394	0.0132642	-0.0404839	-0.0168531	-0.0121264	-0.0116768	-0.0263829	-0.0337	-0.0180833	-0.0159131	0.0469073	0.00870303	-0.0105576	0.0200565	-0.0313399	-0.033688	-0.00810863	0.00372005	-0.0324679	-0.0366141	-0.0257467	0.00217868	0.0130954	0.0100503	-0.0124386	-0.00602557
Bleomycin	-0.165163	-0.11046	0.400313	0.0362012	-0.29441	0.0604099	0.241649	0.0324526	0.681952	-0.609095	0.357068	-0.562133	0.18462	-0.222206	0.29186	0.3379	0.115646	0.202034	0.252327	-1.14418	-0.140239	0.00329129	-0.00177925	0.326431	0.0821704	0.543047	0.468	0.260918	0.106982	0.29017	-0.0762336	0.593573	0.37477	0.0489304	-0.0389687	0.573269	-0.136944	-0.462735	0.0819989	-0.20153	-0.360647	0.297029	0.625964	-0.218369	-0.186309	-0.118634	-0.0922785	0.364268	-0.406986
BMS.509744	-0.0207369	0.035051	-0.0677758	-0.0105946	0.0529461	-0.0109469	0.0131824	0.00800505	-0.00429477	-0.0608145	-0.111549	0.0135496	-0.0073617	0.0037563	-0.0316852	0.0222256	-0.0492077	-0.0204319	-0.072286	-0.136776	0.0206337	-0.0731388	-0.0393846	0.00704067	0.0685589	-0.0452799	0.0148986	0.0500378	-0.060905	-0.147844	0.00276281	-0.0134268	0.0343771	0.0651202	-0.0146808	0.0212187	-0.00671363	-0.0163708	-0.03404	-0.0490459	-0.000114051	-0.065939	-0.0349673	0.00301675	-0.112117	0.000282585	-0.00771356	-0.012086	-0.0497978
BMS.536924	-0.255477	-0.203192	-0.227336	-0.265812	-0.0771729	-0.14618	-0.105352	-0.0634761	-0.384262	0.265778	0.241317	-0.245581	0.233566	-0.433817	-0.565454	-0.014785	-0.224744	-0.23914	-0.105088	0.12381	-0.190005	-0.0429607	-0.0934222	-0.316493	0.0665121	-0.0896486	-0.309658	-0.211264	0.0403669	0.199583	-0.136276	0.325433	-0.118746	-0.0579305	-0.628631	0.0599893	0.287326	0.0223123	-0.557406	0.156729	-0.285637	-0.0627258	0.222429	-0.416522	-0.242535	-0.0188468	-0.309638	0.287537	0.142217
BMS.708163	0.0101724	0.0894558	0.0533669	0.0399623	0.0585257	0.0879076	-0.0646949	0.00861756	-0.0226568	0.0508232	0.00585846	-0.0283716	0.0312057	0.00472144	-0.0096226	-0.0400531	0.0270273	0.0201905	-0.0460809	-0.0241724	-0.0508979	0.0158362	-0.00570371	-0.00702099	0.00965181	-0.0268474	-0.0121493	0.0167076	0.0963565	0.0380737	-0.0470196	-0.0939054	0.0255856	0.070146	0.0727644	0.0423074	0.0976499	-0.0372615	0.0544634	0.0718655	0.060412	-0.00889959	-0.00586898	0.0817466	-0.0420331	0.13609	0.0245378	0.049117	-0.0741403
BMS.754807	0.0793682	-0.160704	0.194685	-0.590475	0.0376096	-0.641468	-0.323086	0.159494	-0.663576	-0.10824	0.321786	-0.43784	0.059186	-0.0896667	-0.0850944	-0.0173133	0.0960931	0.037078	-0.246999	-0.169489	-0.637355	-0.0272942	-0.176098	-0.125081	-0.0702514	0.545289	-0.189689	0.00829859	-0.223693	-0.0829228	0.211785	0.0228174	0.319273	-0.23977	-0.136015	0.241247	0.13977	0.422587	-0.268087	0.361758	-0.308427	-0.338871	0.0527994	0.00133336	0.184225	-0.233651	-0.285636	0.286139	-0.00828865
Bortezomib	-0.0310694	-0.263196	-0.122536	0.0408741	0.05447	0.0361835	-0.282469	0.0290637	0.150293	0.207896	0.291669	0.185171	0.167659	-0.149539	-0.193096	0.132983	-0.0833232	0.0936385	0.243126	-0.129134	0.157703	0.188203	0.0051486	0.3371	0.150878	0.0413515	0.194236	-0.141077	0.0991867	0.0906566	0.219414	-0.456687	0.19443	0.210624	0.0564858	0.184576	0.0715971	0.101912	-0.337737	-0.106713	0.13028	0.143024	0.0855433	0.0736184	0.116114	0.0335848	-0.184935	0.0605751	0.0686237
Bosutinib	-0.018331	-0.00638634	0.0351369	0.00578843	-0.00857208	0.0404426	-0.0428061	-0.0159835	0.039217	-0.00504291	-0.00261167	0.00807835	-0.0376902	0.0257998	0.0263012	0.00488877	-0.00174849	-0.0435091	0.0273804	0.00976875	-0.0310418	0.0108082	-0.0246623	-0.0119517	-0.0243615	-0.0070939	-0.0471917	0.0123264	0.00566724	0.0328897	-0.00910592	0.00191282	-0.0120593	0.00589373	0.0240457	-0.0155241	-0.0208269	-0.000389751	0.0685319	-0.0129707	0.0188913	-0.0130824	0.00669936	0.0350016	0.0691248	-0.0108027	0.022454	-0.0181052	-0.0214712
Bryostatin.1	-0.112255	-0.0356352	-0.0968354	-0.088005	-0.0191566	-0.0373546	0.026261	0.0624092	-0.11444	-0.122427	0.022188	-0.014416	-0.0468802	-0.0422872	-0.129475	-0.0639711	-0.137841	0.0458752	0.0142655	0.0327398	0.0632913	-0.0722064	0.0228468	0.045317	-0.091155	0.0338357	0.0726667	-0.113553	-0.0676104	-0.0896228	0.0276447	-0.0852552	0.0189271	-0.040219	-0.0741753	0.0278689	0.00144129	-0.0893948	-0.0686608	-0.0521115	-0.0544075	-0.0405284	-0.0788304	-0.0577332	-0.0931738	-0.0308777	-0.0664484	0.00697416	-0.0517408
BX.795	0.176717	-0.0563015	0.250182	-0.000694586	0.00753641	-0.0590464	-0.00878379	0.21639	-0.18095	0.148659	0.0535154	-0.293279	0.212048	0.0351766	-0.0621429	0.0558071	0.105968	0.159891	0.152953	0.0609388	0.0937625	-0.0562298	-0.205602	-0.0616054	0.484294	-0.015053	-0.12111	0.292447	0.0414145	-0.208484	-0.0884251	0.154692	-0.041062	0.0626431	-0.182129	0.135059	0.262354	0.362665	-0.0244153	0.308338	0.297673	-0.014039	0.275459	0.0827951	0.0620515	-0.0888485	0.0606649	0.0569148	0.420883
Camptothecin	0.0735248	-0.0371403	0.468641	0.277931	0.251222	0.565132	-0.0831489	0.285445	8.75655e-05	-0.0114266	0.242744	-0.00444304	-0.115498	-0.00347447	0.0204606	0.184877	-0.000247997	0.057987	-0.43869	0.704422	0.0881558	0.11612	-0.164956	-0.105547	-0.088654	-0.380649	-0.142507	0.0289184	0.148375	-0.199387	-0.39318	0.554254	-0.170492	0.265215	0.0329372	-0.381106	0.211356	0.164345	-0.0347471	0.916498	0.344237	0.0420775	0.379266	0.156393	0.327386	0.227036	0.344962	0.352677	0.117954
CCT007093	-0.0269255	-0.0294407	-0.0199877	-0.00444465	-0.00957176	-0.00519029	-0.0466849	-0.0144307	0.00143753	-0.0242754	-0.00326788	-0.00176939	-0.0235269	-0.00731405	0.00155923	-0.0163826	-0.00637059	-0.0332424	0.0147204	-0.0153405	-0.0204645	-0.0343959	-0.0038465	-0.00309391	-0.0436775	-0.00662273	0.0152097	-0.00421979	-0.0140906	-0.0053638	-0.0143236	-0.0400343	-0.0152733	-0.0334925	2.16863e-05	-0.023077	-0.0157539	-0.0119481	0.00609639	-0.0239792	0.0129864	-0.0114875	-0.0213423	-0.005693	-0.0207459	-0.012187	-0.0104467	-0.0424475	-0.0280691
CCT018159	0.123132	0.218424	-0.011397	-0.624712	0.205128	0.166128	0.0280268	-0.0924769	0.0636593	-0.534359	-0.0465617	0.200273	0.186927	-0.169481	-0.427046	0.135515	-0.210697	0.107746	0.323559	0.374707	0.00725318	0.123783	0.108481	0.453342	0.0297098	0.10633	0.156583	-0.00268779	0.0372534	0.72199	-0.0101822	-0.317499	0.044233	0.0333275	0.348204	0.115283	0.334867	-0.140798	-0.135259	-0.041596	-0.246937	0.0371532	-0.0430602	0.0403381	-0.150824	0.0609235	-0.189933	0.306627	0.3579
CEP.701	0.0355784	-0.00484864	0.15883	-0.0401311	0.0206981	0.0869053	0.0177456	0.180349	-0.0351357	0.0964712	-0.19815	-0.293156	0.321641	0.039387	0.3559	-0.0328597	0.281638	-0.138343	0.319182	-0.306787	-0.159913	0.0160721	-0.0591221	0.108529	-0.0275265	-0.0497406	0.076189	0.110942	0.136409	0.276493	-0.113901	-0.107739	0.112902	0.0924194	0.00390657	0.0570978	0.114253	0.0245959	0.144512	-0.134653	0.0176572	-0.0582467	0.0757502	0.518079	0.262515	0.227528	0.149149	-0.173269	-0.330163
CGP.082996	-0.0045596	-0.0750494	0.0803821	0.0706457	-0.0826875	-0.172715	0.100269	0.140517	-0.274051	0.136181	-0.0804069	-0.0911615	-0.0660923	0.0388367	0.0924604	0.0728114	0.247646	0.0837673	-0.0929698	-0.141297	-0.0632201	0.0314767	0.0937645	0.0508566	-0.374713	0.0825843	0.0115785	0.103768	0.011322	0.0626326	-0.219364	-0.204512	0.0773438	-0.149168	0.189054	0.0612794	-0.233195	-0.0687634	0.332723	-0.171161	-0.0647249	-0.0497844	0.0172055	-0.0101775	0.016219	-0.112296	0.0398356	-0.122403	-0.155778
CGP.60474	-0.0585656	-0.00370229	-0.128963	-0.0375438	-0.100822	0.0315564	-0.0334891	0.0319785	-0.0865468	-0.000268675	-0.0492055	-0.0271074	-0.00436508	0.0211688	0.191886	-0.0345073	0.000796372	0.0994372	-0.0821397	-0.0868578	0.0239575	-0.0542118	-0.0307224	-0.0129685	-0.187042	-0.0468005	0.0829156	-0.138492	-0.103595	-0.133092	-0.147118	-0.332375	-0.110946	-0.0810429	-0.0704412	0.0240051	-0.0745698	-0.122802	-0.00168709	-0.0960026	-0.037212	-0.0439686	-0.10749	-0.16304	0.0371111	-0.0567426	-0.025384	-0.0643119	-0.192825
CHIR.99021	-0.161392	-0.143414	-0.0902059	-0.0153939	0.0602883	-0.129561	-0.0859959	-0.0319784	-0.0206439	-0.18711	0.107978	-0.00290933	-0.173057	-0.148348	-0.11143	0.0448661	-0.0627321	0.0571067	0.0651951	-0.056916	0.0218017	0.00670443	-0.0612547	0.0626632	0.00252531	0.313005	0.0544936	0.00130088	0.0184211	0.185169	0.148599	0.0755596	0.201433	-0.154265	0.0756864	0.214352	0.115716	0.0689325	-0.101604	0.00677472	0.0246333	0.0230925	0.111884	-0.0917655	-0.0185124	0.152219	-0.307334	0.094887	-0.0697071
CI.1040	0.0743244	0.0467064	0.0628677	0.104704	-0.0143736	0.0433421	-0.0338097	0.040717	0.0629032	0.0172246	0.0342427	-0.0323622	0.0138083	0.0812616	-0.0132036	-0.0321861	0.0362065	0.0172392	-0.0514287	0.0286785	-0.0376782	0.0710373	-0.0247384	-0.0130932	0.00642962	0.02646	-0.0938657	0.0358713	0.0518261	0.00399375	0.00294539	-0.0393575	-0.00602423	0.0318259	0.000104955	-0.0072438	-0.0409736	-0.0540454	0.0980941	-0.0339473	0.0107452	0.00487995	0.0488172	0.00724655	0.0577098	0.0509104	0.050582	0.00734201	-0.0703985
Cisplatin	0.0148679	-0.0266431	0.139225	0.435186	-0.131273	-0.384129	-0.225548	0.0406045	-0.162336	0.283455	0.141217	0.216119	0.0730456	0.309798	0.276411	-0.00119377	0.363751	-0.166146	0.320429	0.0356097	-0.0936515	0.0038864	0.260429	-0.0557124	0.0353684	-0.00103002	-0.0239733	0.200759	0.101934	-0.0593869	0.268456	-0.007498	-0.0127393	-0.188165	-0.0227701	-0.111832	-0.202601	0.0457346	0.146164	-0.293023	-0.0493965	-0.200563	0.0720586	0.36524	0.0428879	0.0762129	0.0515495	-0.323128	0.137935
CMK	0.00909531	0.102133	0.0525357	0.00282172	0.0100497	0.0581987	0.0354118	0.0188791	0.100786	-0.0134397	-0.103155	-0.0746133	0.0413709	0.0230415	0.131895	-0.133526	-0.0465997	0.0229115	0.101997	-0.0174213	0.0176811	-0.0602294	-0.151192	-0.060524	0.0126102	-0.0167659	0.00533884	0.0107389	-0.113854	0.0618595	-0.0736067	-0.0213598	-0.0503576	0.00898352	-0.00922714	-0.071944	0.0669842	0.0627442	0.0256659	-0.0544716	-0.0434698	0.0305473	-0.135179	-0.0831732	0.0896446	-0.0546315	0.0277241	-0.118065	0.0350041
Cyclopamine	0.0415517	-0.137456	0.105374	-0.0399332	0.0638589	0.0131275	-0.0886843	-0.0451189	0.0445599	0.0346354	-0.0682801	-0.0145579	0.0433556	0.0421999	0.0463201	-0.0710874	-0.00778489	-0.00311993	-0.00737579	-0.0782107	0.018208	0.00757904	0.025767	0.0129247	0.0347811	0.0243482	0.0116185	0.0478307	0.0292591	0.0503593	0.0150794	0.130374	0.00826176	0.0130048	-0.0538333	0.0287275	-0.0384439	0.0663318	0.0641934	0.00589271	0.0253053	0.0506129	0.0156796	0.0750194	-0.00996583	-0.0346814	0.0831858	0.0880043	-0.0812646
Cytarabine	-0.0178919	0.0074712	-0.00719113	0.0223021	-0.0636025	-0.0192449	0.00443802	0.00297892	0.00600744	-0.00811286	-0.0015226	-0.0340572	0.0153794	-0.00509895	0.0273632	-0.0311177	0.0208358	0.022629	-0.0129586	-0.0306378	-0.000503327	0.00704296	-0.0370967	-0.0302367	-0.0267153	0.00374596	-0.0142143	0.0112315	0.0037327	-0.0136488	0.000818298	-0.036164	0.0054707	0.0288568	0.00683565	0.0104821	-0.0216504	-0.0187501	0.00682149	-0.0383783	-0.0104807	-0.0290783	-0.00213821	-0.0443213	0.0176548	-0.0473751	-0.00174417	-0.0590631	-0.0386082
Dasatinib	0.166364	0.289418	0.0224754	0.179727	0.252435	0.222489	-0.12993	-0.0792265	0.309771	-0.352464	0.0368305	-0.0446868	-0.101025	0.260809	0.407597	-0.066394	0.119068	0.0915458	0.288558	0.495758	0.0887334	0.216339	0.501296	0.323922	-0.0312191	0.319618	0.0244344	0.0374017	0.273692	-0.0480744	0.484173	-0.561412	0.129247	-0.0887229	0.162444	0.414122	0.147242	-0.0549172	0.207536	0.0582535	0.611109	0.0636021	-0.0547681	0.3471	0.229243	0.293062	0.023636	0.302456	-0.336395
DMOG	0.410297	0.0676032	-0.206467	0.260146	0.170144	-0.193213	-0.0415006	-0.101269	-0.0651261	-0.56354	0.112172	-0.0907461	-0.577066	0.157289	0.0253359	-0.0523782	0.215226	0.166873	-0.263552	-0.255958	-0.0141063	0.110393	-0.0584528	-0.106738	-0.170658	0.0927384	0.172514	0.0967168	-0.130264	-0.103966	0.0190652	0.658427	0.21804	-0.105248	0.521826	0.106267	-0.106899	-0.302065	0.556433	-0.17945	-0.559472	0.222998	0.369303	0.324181	0.18406	0.247888	0.0743328	0.270153	0.00130733
Docetaxel	-0.0990406	0.095094	-0.291566	-0.130926	-0.0868728	-0.120334	0.112483	0.0962349	-0.013312	0.031215	-0.000942692	-0.162885	-0.0618252	-0.0899954	-0.042822	-0.201734	-0.060625	0.0978972	-0.0532614	0.0455708	-0.157599	0.0859783	-0.0907971	-0.0710668	-0.329545	0.244784	-0.0240348	-0.0846832	-0.095584	0.173409	0.088488	0.281913	-0.00874082	-0.0280481	-0.0946689	0.247631	-0.0398818	-0.127627	-0.0119663	-0.0711214	-0.193591	0.012341	-0.162368	-0.112041	-0.0830387	0.257809	-0.13878	0.0515417	-0.0782333
Doxorubicin	-0.289929	-0.484652	0.144671	-0.110017	-0.0662268	-0.230029	0.176661	-0.237086	0.297944	-0.193839	-0.257532	-0.103394	-0.313911	-0.221836	0.0001485	-0.041172	-0.16474	-0.0242936	0.119179	-0.575608	0.078387	-0.141192	0.16682	0.127437	0.323346	0.183234	0.017819	-0.128564	-0.103843	0.201929	-0.106106	0.236094	0.162902	-0.36993	-0.165862	0.199668	-0.228113	0.11256	-0.0371582	-0.179252	-0.0532499	0.0632614	0.300779	-0.466184	0.210516	-0.150741	-0.1527	0.068289	-0.00965919
EHT.1864	0.0357659	0.0594455	-0.0214	0.0349127	0.0484246	0.0878716	-0.323351	-0.0556273	-0.00272177	0.335739	0.0715112	0.0475371	0.0914665	0.0450209	0.139357	-0.080245	0.000423755	0.0176224	0.1371	-0.0114039	-0.023739	0.0244917	-0.100418	0.040344	0.0864876	0.153978	0.0846262	0.205106	-0.0361451	0.0233361	0.0110805	-0.366385	0.0440544	0.0353766	0.13998	0.10111	-0.257103	0.0962449	0.204711	-0.146251	0.0682058	0.134891	-0.259217	-0.0868449	-0.048734	0.0126176	0.0184333	-0.208605	-5.66342e-05
Elesclomol	0.06437	-0.0461304	0.391399	-0.174048	-0.0366927	0.00235742	0.0934108	0.0237999	0.322153	-0.277709	0.261212	-0.00270085	0.202659	-0.0451239	-0.501688	0.0533706	-0.257417	0.0515794	0.576748	0.0953337	-0.120632	-0.119119	0.14487	0.0602867	0.201061	-0.0486925	0.00336063	-0.111409	0.469374	0.117646	0.157959	0.00305884	-0.15893	0.0778157	0.162651	-0.192696	-0.0349721	0.125502	-0.220356	0.119003	0.109871	0.148481	0.272489	0.0962159	0.233952	-0.0688275	-0.0568125	0.261115	0.328718
Embelin	-0.102389	-0.0343453	-0.265081	-0.226198	-0.0484845	0.00877545	-0.104231	-0.270344	-0.246003	0.307661	-0.207025	-0.00121758	0.0763819	-0.0751888	-0.140589	0.0153494	-0.0708023	-0.162341	-0.275357	0.104326	0.00181061	-0.053105	-0.0482202	-0.0558163	-0.0290259	-0.0237528	-0.0153505	-0.121529	-0.325007	0.0445647	-0.0937453	-0.36457	-0.0549345	-0.066622	-0.141375	-0.0875434	-0.133295	-0.0793194	-0.165117	-0.0459014	0.0382494	-0.0215482	-0.257618	-0.0809493	-0.371823	-0.160823	-0.130076	-0.200105	-0.17242
Epothilone.B	-0.0285181	0.0613175	-0.0626449	-0.011324	-0.0552194	-0.0751592	-0.0123091	-0.00893734	-0.0556696	-0.0431073	0.00380865	-0.027886	0.0011246	-0.0800499	-0.0104296	-0.0472677	-0.0362019	0.00746566	-0.0607186	-0.0950872	-0.0560289	0.0403029	-0.0231206	-0.040846	-0.0727549	0.0196655	0.0257736	-0.0424064	-0.0196244	-0.103378	-0.00654155	-0.0587069	0.00353052	0.0437803	0.0325848	-0.00712435	-0.00307765	-0.0221063	0.0150025	-0.0282618	-0.0603389	-0.0225692	-0.0578317	-0.0202582	-0.0499884	-0.0403019	-0.0141021	-0.00262186	-0.0642125
Erlotinib	0.06095	0.094145	-0.0420918	-0.0178872	-0.105683	-0.0283179	0.323369	0.0126128	-0.200621	0.341835	-0.182957	0.187589	0.0596135	-0.0617216	-0.0581243	0.0462218	-0.0568771	-0.0481868	-0.38019	-0.290571	-0.134734	0.0806851	-0.0792332	-0.141073	-0.0385474	-0.137596	0.044211	-0.111436	-0.0846418	-0.11914	-0.210907	-0.114969	-0.158857	0.00606762	0.0902257	-0.202569	0.122965	-0.105511	-0.0422959	0.0612985	-0.127493	-0.0710236	-0.212813	-0.250192	-0.273614	-0.212642	0.0976651	0.0468812	0.181153
Etoposide	0.00427683	0.0457937	-0.00245839	0.0275929	-0.0666284	0.0529595	-0.0558125	-0.0376595	0.124769	-0.0515254	-0.00384387	-0.0335745	0.0706504	0.0242617	0.076619	-0.0380714	-0.0136781	0.0470928	0.0184876	-0.0852367	-0.0306874	0.00928096	-0.0210537	0.0163074	0.0311663	0.0211654	0.0276561	0.0304065	-0.011743	0.0278645	-0.0192367	-0.0694949	0.00431841	0.0903866	0.0555858	0.0367695	0.0435402	-0.0238128	0.0354871	-0.0549211	0.0239157	0.0313184	-0.00770741	0.041442	0.0430188	-0.0300805	0.0533855	0.00761408	-0.0211708
FH535	-0.0826675	0.152838	-0.205775	-0.0433005	0.069669	0.0981122	-0.0129914	0.0756047	-0.0621166	-0.00690411	0.0515513	-0.0496934	0.164497	0.040555	-0.153007	0.0223752	0.00539253	-0.0695666	-0.241302	0.0770887	-0.1124	-0.071461	-0.0506065	-0.155096	-0.0769324	-0.0985681	-0.0107901	-0.12101	-0.0765247	-0.113945	0.0601559	-0.206694	-0.0931349	0.0404124	-0.199538	0.0367867	0.247811	-0.157701	-0.20274	0.0886601	0.119758	-0.0808583	-0.078259	-0.361582	-0.235832	0.00185623	-0.050648	0.311388	-0.0376037
FTI.277	-0.0724429	-0.0156714	-0.0358886	-0.0188118	-0.131096	-0.113764	0.020653	-0.0394523	-0.038775	0.036257	-0.032738	-0.0979503	-0.19945	0.00189093	0.013167	-0.104404	-0.189568	0.012299	-0.0954316	-0.161446	0.0635098	-0.14832	-0.111372	-0.131875	-0.0507888	-0.219777	-0.138874	-0.0163784	0.00326748	-0.0950054	-0.218862	-0.0578959	-0.104284	-0.03217	-0.122294	-0.163656	-0.105294	0.0134475	-0.00537246	-0.185582	-0.0914699	-0.120138	-0.0845964	-0.22638	0.0378074	-0.13279	-0.0356024	-0.23998	-0.0884123
GDC.0449	-0.0240154	0.0113452	0.0666818	0.0579556	-0.0554746	0.0850192	0.0314544	-0.0563369	0.137499	0.0958011	-0.0840591	-0.0272467	0.0166806	-0.0129287	0.114917	-0.0975864	0.11725	0.0517941	0.126523	0.00202568	-0.0708421	0.0388111	-0.0324648	-0.0172849	0.155233	-0.0142734	-0.0620751	0.0218706	-0.036062	0.0705748	-0.0533129	-0.0812715	-0.0210922	0.0420618	0.0797764	-0.0317214	0.0571768	0.0295328	-0.0809065	-0.0226135	-0.0126828	0.126769	-0.00531208	0.0489863	0.0739608	-0.122437	0.0552333	0.0610477	0.0371008
GDC0941	-0.409102	-0.127049	0.025201	-0.0250191	-0.358657	-0.123076	-0.0969172	0.245725	-0.0243393	-0.0215445	-0.0438435	0.147702	-0.100175	0.2342	0.329434	-0.183624	0.0287626	0.125774	-0.28063	-0.32454	0.133938	0.306036	-0.195006	-0.0565154	-0.191914	-0.023572	-0.113825	-0.0541618	-0.329183	-0.421425	0.112766	-0.346521	-0.0991316	0.00579355	0.159236	-0.180425	0.00214529	-0.123212	-0.092036	-0.0148927	-0.0914105	-0.22127	0.0808425	-0.112874	0.269198	-0.227559	0.112557	-0.390713	-0.029264
Gefitinib	-0.0723692	0.242422	-0.255512	0.0617009	-0.223647	0.428724	0.0438803	-0.120107	-0.127691	0.276586	0.060202	0.112207	0.230325	0.0455188	-0.293899	0.00779853	0.010408	0.0545079	-0.193969	0.00354662	0.03074	-0.0107281	-0.0772346	0.116666	0.281012	0.0761617	0.280165	-0.0432637	-0.109781	0.279034	-0.0943359	0.166058	0.0520077	0.1283	-0.063901	0.243936	0.129501	-0.0265101	-0.0584168	-0.133939	-0.120583	0.0605406	0.295463	-0.147218	-0.148421	-0.101941	-0.0936112	0.224748	-0.0128909
Gemcitabine	-0.560454	-0.00252265	-0.215695	-0.271171	-0.720654	-0.893651	-0.0291158	0.0461387	-0.618876	-0.238031	-0.433498	-0.229565	-0.260666	-0.396472	-0.501611	-0.126783	-0.0673509	0.00232517	-0.117284	-1.22745	-0.366167	-0.33497	0.00724783	-0.0634944	0.297808	-0.0528736	0.274747	-0.268207	-0.183412	-0.0759976	-0.275302	-0.476375	-0.243102	-0.403019	-0.341018	-0.144235	-0.132861	-0.511064	-0.554405	-0.523309	-0.443106	-0.349381	-0.0709601	-0.534513	-0.291036	-0.526983	-0.586301	-0.59577	-0.132755
GNF.2	0.11538	0.0576721	0.0788826	0.130096	0.0245009	0.168114	0.0597072	0.0979732	0.0321617	0.0670388	0.055844	0.0203975	0.175808	0.193839	0.140703	0.0134071	0.167226	0.074122	0.156679	0.0843138	0.0320986	0.178357	0.0111609	0.0099427	0.198778	0.0518	-0.0466058	0.185547	-0.00536302	0.105992	0.0454673	-0.198721	0.0882743	0.13416	0.129257	0.0783038	-0.0226895	0.0521472	0.0820757	-0.00631956	0.0842689	0.00844097	0.0341798	0.16313	0.0531779	-0.0369354	0.159796	-3.52542e-05	0.0814673
GSK269962A	-0.0115611	0.0991379	-0.312651	-0.040176	-0.0873308	0.414998	-0.0734303	-0.158952	0.0965046	-0.0106645	0.0503429	-0.0776869	0.235042	-0.18204	0.0100606	-0.100428	-0.177355	0.041105	-0.033501	-0.135071	-0.0535789	0.0538793	-0.203482	-0.284659	0.182763	-0.318841	-0.00164243	0.0294682	-0.198583	-0.0608939	-0.40656	0.0256426	-0.250788	0.195982	-0.146478	-0.219514	0.258624	-0.127563	-0.20449	-0.227021	0.0795619	0.0662934	-0.0546754	-0.0399179	-0.192436	-0.230048	0.131059	0.178853	-0.0779349
GSK.650394	0.073754	0.208797	-0.184444	0.136813	-0.0295813	0.161541	-0.0740071	0.156783	-0.0645281	0.225905	0.140496	0.0983768	0.142742	-0.014146	0.212076	-0.00948026	-0.0050121	0.167064	-0.0221311	0.179209	0.0507422	0.0913675	0.0922677	0.0245713	0.112691	-0.0186334	0.0261047	-0.171034	0.0431668	-0.000212889	0.15273	-0.125267	0.0780724	0.0771473	0.0241395	-0.00642426	0.252178	0.0414363	0.096147	-0.0477766	-0.0339082	-0.0592515	0.121071	0.0415184	0.170306	0.0516772	0.110379	-0.0705772	-0.087939
GW.441756	0.024065	-0.00981558	-0.0176324	-0.00380549	-0.0245008	-0.0208339	-0.0221728	-0.00944438	-0.0150538	-0.0302395	-0.00469002	-0.0161221	0.0068726	-0.0203127	-0.0113765	-0.0147474	-0.0114596	-0.00718972	-0.0298638	-0.0131225	0.000236016	-0.00619522	-0.0117869	-0.0169233	-0.0201471	-0.0277435	0.00145812	-0.00751607	0.0206905	-0.0296011	-0.0084694	0.0129115	0.0112353	0.00715678	-0.00341604	0.00142919	0.0016623	-0.0164932	-0.0185614	-0.00822919	-0.0106164	-0.00840439	0.0132863	0.0101115	0.00678625	0.0331845	-0.000295183	0.033643	-0.0188216
GW843682X	-0.0188339	-0.00944247	-0.00867443	-0.0173171	0.0219011	-0.0347599	0.0234016	0.0278426	-0.0104503	-0.0559237	-0.0133459	-0.0443515	-0.0254532	-0.00660085	-0.0166923	-0.015475	-0.0134487	0.0164247	-0.0354159	0.00738969	-0.00815174	0.00288433	-0.0120528	-0.00139259	-0.000244851	0.0141236	-0.017068	-0.0331669	-0.000207009	-0.0842045	0.0156314	-0.0255417	0.000584864	-0.00732993	-0.0154851	-0.00789226	0.00986848	-0.0319797	-0.0255633	0.0215215	-0.0160168	-0.00527488	0.0163956	-0.0226071	-0.000873596	-0.0282531	-0.00743945	0.010126	-0.000366024
Imatinib	0.0351986	-0.00663982	0.0158908	0.030848	-0.0402053	-0.00441313	-0.0260821	0.0433865	-0.0209999	0.0266309	0.0077126	0.00828144	0.0213418	0.0340196	0.0356982	-0.00204394	0.035731	0.0308402	-0.00511919	0.0198845	0.0229939	0.0388604	0.0436917	0.0216746	0.0482081	0.019765	0.00158909	0.033172	0.00785151	-0.0492969	0.0518783	-0.0248363	0.0173237	0.0304149	0.011222	0.0287222	-0.027822	0.0289972	0.00264674	0.0319845	0.0186237	0.034106	0.0135902	-0.000502169	-0.00925839	-0.0205147	0.0417181	-0.00888191	0.0324227
IPA.3	-0.0153596	-0.0271583	-0.433727	0.276089	0.0506452	-0.216491	-0.0246633	0.124419	-0.211372	-0.131122	0.298778	-0.125179	-0.16822	-0.0659574	-0.0162118	-0.200651	-0.14034	-0.0130707	-0.272985	-0.0375233	-0.000630271	-0.00210655	-0.130569	-0.13404	-0.310055	-0.00195649	-0.0122299	-0.249117	0.0609828	-0.473402	0.145162	-0.0388867	0.0604342	0.0157147	0.0288954	0.0689109	-0.0397305	-0.316545	0.0552867	-0.247389	-0.186633	-0.168363	-0.017891	-0.149172	-0.128213	0.257371	-0.20531	-0.0671659	-0.247353
JNJ.26854165	-0.214742	-0.0761703	0.169083	-0.0349562	0.0671881	-0.0417963	-0.000782503	-0.0328391	0.0445452	0.100694	-0.216013	-0.173854	-0.0880342	-0.113562	-0.0281289	-0.139421	0.0309401	-0.0594412	-0.131642	0.0211574	0.0559093	-0.234365	-0.178994	-0.254749	0.147301	-0.172744	-0.235638	-0.0332917	-0.21021	-0.258023	-0.220516	0.0826296	-0.202161	-0.0993669	-0.285359	-0.143637	-0.00333807	-0.025468	-0.197324	0.0968753	0.039756	-0.0149353	-0.0873413	-0.0654577	-0.0474289	-0.239087	-0.0630815	0.0134997	-0.010295
JNK.9L	-0.00705966	0.0105986	-0.00536464	-0.00365575	-0.0368111	-0.0227557	-0.000620798	-0.00412249	-0.000727816	0.0153253	-0.00853069	0.00636432	-0.0105333	0.00111534	0.00897915	-0.0111722	0.00981166	0.00400289	-0.00802143	0.000761553	-0.0349612	-0.00127598	-0.00673207	0.00502297	-0.0128017	0.0109837	-0.0170825	-0.0187283	-0.00791432	0.0135583	-0.0118201	-0.0110998	0.00607915	-0.0200375	0.0149191	-0.00818818	-0.00944285	-0.024682	0.024056	0.00609383	-0.0235572	-0.0110115	0.00363396	0.0190209	0.0237751	-0.0329463	0.00106933	0.00815735	0.0085887
JNK.Inhibitor.VIII	0.0117833	0.0851007	0.0171726	-0.0347983	-0.0475363	0.0220585	-0.0612348	0.044103	-0.011702	-0.030291	-0.0886002	-0.0411301	0.0474965	0.00688323	0.0163976	-0.0511911	-0.0597629	-0.132448	-0.0838369	0.0897773	-0.0770401	0.0316935	-0.0839311	-0.0348148	0.0240727	-0.00236369	-0.0409286	-0.11921	-0.0443877	-0.0498051	0.000121826	0.085649	-0.0473823	0.0715677	-0.0897336	0.0185416	0.0821707	-0.0148353	-0.0718517	0.0563598	0.0328171	0.0388626	-0.0157806	0.0675825	0.0450783	0.025209	-0.0170101	-0.027195	0.0713309
JW.7.52.1	-0.0252816	0.0669572	0.0982266	0.115643	-0.0950612	-0.177578	0.0336692	0.0459882	-0.0510608	-0.024532	0.025166	0.204079	-0.0433936	0.113084	0.0479715	0.144656	0.0561918	0.098241	-0.11153	-0.0639749	-0.0194935	-0.0603611	0.11408	0.0863161	0.0564801	0.0632735	0.0485591	-0.0191942	0.0301171	-0.0544875	0.151455	0.119147	0.121431	-0.048338	-0.00778763	0.0248641	-0.12215	0.144643	0.0476329	0.151425	-0.00324008	-0.0436515	-0.0177923	0.0411209	-0.00225225	0.0485381	-0.0396317	0.0185565	0.155202
KIN001.135	-0.00904479	0.00308324	0.0153311	0.0321398	0.0770737	0.0397306	-0.00407508	0.00134455	0.0363456	0.0429168	0.0412974	0.0808765	0.0538238	0.0602079	0.0340713	0.019978	-0.0264147	0.00568623	-0.0161099	0.0522544	0.0816184	0.0815884	0.0491859	0.00980498	0.0592962	-0.00848141	0.0284743	0.0661377	0.0772026	0.0559069	0.0188306	0.00630438	0.00917123	0.0637957	0.0282478	-0.0824284	0.0667134	0.0704714	0.0317828	0.0626311	0.00124918	0.00872941	0.061841	0.0152827	-0.00198842	0.0175403	0.102718	0.0502099	0.0470484
KU.55933	0.0784111	0.0733224	0.111194	-0.00570604	0.128115	0.0437395	0.0651083	0.193779	0.238389	0.074029	0.182303	0.115351	0.171984	-0.0677187	0.153429	0.167543	-0.0653748	0.135614	0.124893	0.13322	-0.00228383	0.0450168	-0.033796	0.0904045	-0.00385849	0.00885389	0.197954	0.0475805	0.139193	0.154337	0.116726	0.117914	0.137161	0.279534	0.239469	0.0341752	0.0928767	0.0786307	0.0386359	0.0993247	0.0662528	0.142457	-0.0336828	0.0359405	0.109342	0.213687	0.10235	-0.0509857	0.145904
Lapatinib	0.134137	0.1307	-0.0497545	0.101772	0.153023	0.181811	0.150288	0.161287	0.0239387	0.249144	0.0818878	0.180607	0.153655	-0.130008	0.0790382	0.0622942	0.034449	-0.092169	-0.214409	0.00914014	-0.00626003	0.145715	-0.0375331	-0.102671	0.192748	-0.0767869	0.0280321	0.0266545	0.116527	0.0591298	-0.110996	0.141537	-0.0674128	0.241011	-0.00754239	-0.122513	0.295085	0.0987855	-0.00462149	0.00689249	0.0461231	-0.0671542	-0.136867	-0.148227	-0.211091	0.0553595	0.0738512	0.208688	0.122535
Lenalidomide	0.0309219	-0.004882	0.0126185	-0.0357758	-0.0215928	-0.00758915	0.0131026	0.010333	0.0272374	-0.00453847	-0.0230045	-0.0808623	-0.0116796	-0.00209797	-0.00285089	-0.081049	0.0158369	0.00277101	0.0332454	0.01751	-0.00818757	-0.0126905	-0.0456777	-0.0572082	0.0475178	-0.0144235	-0.00791355	0.0326187	0.0278494	0.0453932	-0.0425271	0.0431184	-0.00265997	-0.00837641	-0.0686593	-0.00267142	0.0470729	0.00614363	-0.0251932	-0.0246307	-0.0144723	-0.0442412	0.00449535	-0.0401322	0.0703024	-0.0134589	0.0126761	0.00835569	-0.0322643
LFM.A13	0.0249382	-0.102158	-0.127429	-0.037229	0.0217767	0.0453725	-0.0996938	0.0177653	-0.107252	0.105102	-0.0568623	-0.0944937	0.0487207	0.024126	0.00486839	-0.165274	0.0842474	-0.0316116	-0.0111652	0.110175	0.0541668	0.000432807	-0.0638507	-0.0413855	0.0252065	-0.0564247	-0.083307	-0.0213696	-0.151818	0.0417682	-0.106308	-0.157716	-0.00488484	0.0524354	-0.0688353	-0.0018916	0.112912	-0.0443603	-0.0490231	-0.076302	0.0711452	0.0731086	-0.081855	-0.0622407	-0.0419532	-0.111174	0.000765819	-0.0906069	0.00180021
Metformin	-0.0884213	-0.156712	-0.271062	-0.243735	-0.132464	-0.381764	-0.266501	-0.0319679	-0.265871	-0.175017	0.0510782	-0.239073	-0.276367	0.0165422	-0.37851	-0.0325396	-0.251856	-0.0507828	-0.16692	-0.0970081	-0.170186	-0.389781	0.0319769	-0.0928913	-0.272814	0.115337	-0.274157	-0.171306	0.0993061	-0.294915	-0.00925324	-0.223491	-0.0640513	-0.252727	-0.232769	-0.0109579	-0.117645	-0.122779	-0.142093	-0.26768	0.0911447	-0.250387	0.0641091	-0.165795	-0.103617	-0.0577137	-0.452941	-0.131603	-0.313467
Methotrexate	0.051484	0.0593972	0.275722	0.151645	0.0545107	-0.00118145	0.0325765	0.207011	0.201886	0.0640759	0.0453045	0.099486	0.231665	-0.031299	0.224848	0.0732114	-0.0471916	0.00443038	0.0208614	0.133514	0.200264	0.11375	0.0277811	-0.0224756	0.0639017	-0.251607	0.185503	0.0744528	0.182654	-0.102822	-0.0194185	-0.219964	-0.185868	0.215906	0.142687	-0.211659	0.00548253	-0.04276	0.0457391	0.0526286	0.0291213	-0.116296	-0.242114	-0.0979162	-0.085902	0.00815642	0.166507	-0.265448	0.22976
MG.132	0.297925	-0.121964	0.133715	0.0868565	-0.0227809	0.317592	-0.0607013	0.153798	0.38918	-0.0383598	0.170457	-0.229169	0.205161	-0.133644	-0.150851	-0.227415	-0.0500025	0.242127	0.295665	0.186167	0.0121818	0.231043	-0.21371	0.0646733	0.142856	-0.101063	-0.0174018	-0.055675	0.123535	0.231042	-0.141179	0.0553463	-0.133988	0.322094	0.024479	-0.0562049	0.0904751	-0.0176894	-0.20125	0.134373	0.00813446	0.229163	0.126684	-0.0043005	0.367273	0.12574	0.0776753	0.305893	-0.0197679
Midostaurin	-0.120341	-0.183931	0.106521	-0.0639551	0.211539	0.133314	0.0959841	-0.00504415	0.299523	-0.212466	-0.0168965	-0.166183	0.0273962	0.0506338	0.176177	-0.249641	-0.000739351	-0.102039	0.351653	0.34696	-0.116724	-0.00221249	-0.182764	-0.124338	-0.270078	-0.08105	-0.317712	-0.055666	-0.0432308	0.0261492	0.127453	-0.187617	0.108705	-0.137966	0.388922	-0.0557233	-0.145992	-0.121357	0.175968	0.0739099	-0.110083	0.101069	-0.141976	0.187315	0.445387	0.163463	0.193234	-0.145727	0.0201088
Mitomycin.C	0.140833	-0.0104107	0.0970688	0.243788	-0.00115312	0.224027	-0.348846	0.0986381	0.751	-0.946624	0.11127	0.199473	0.0058942	0.0518154	0.38891	0.0971098	0.163947	0.304631	0.0135558	-0.0562974	-0.0417229	-0.0498488	0.547243	0.548835	0.160538	0.290729	0.294618	0.0283067	0.0130842	0.356293	0.254519	-0.318853	0.260957	0.0892044	0.161536	0.506099	0.00664882	0.197502	0.176319	-0.00411105	0.511028	0.355328	-0.173446	0.206686	0.200446	-0.0481782	0.278213	0.428153	-0.153799
MK.2206	-0.0355368	-0.0219284	-0.0179466	-0.0445263	-0.0643784	-0.0301745	-0.0123422	-0.0451242	-0.0211664	-0.0793789	-0.048434	0.0228143	-0.0253225	-0.00149517	-0.042157	0.0221624	-0.00529344	-0.0428018	-0.0161314	-0.0312848	-0.0264051	-0.0566933	0.000984769	0.00728656	-0.0126329	0.0119885	-0.0097882	-0.0241821	-0.0447363	0.0387383	0.033531	0.0539411	0.0302965	-0.0227127	-0.0337418	0.0475928	0.0133427	0.0216116	-0.0406441	-0.0130275	-0.00874452	0.00384608	-0.000724013	0.029056	-0.0321624	-0.0365279	-0.077041	-0.0424695	0.0355918
MS.275	0.150773	0.013233	-0.124345	-0.100914	0.108078	0.195352	0.167712	-0.100185	-0.237217	-0.000209929	-0.0420744	-0.0243359	0.0215313	-0.0399507	-0.161093	0.175482	-0.00922361	-0.09483	-0.175266	0.288008	-0.0784356	0.354065	0.198428	0.0577323	0.0895226	-0.239187	0.00353413	0.0469704	0.244667	0.165283	-0.135704	0.293956	-0.199741	0.0271014	0.177297	-0.170391	0.252645	0.000498659	-0.16922	0.0284559	-0.221171	-0.150901	0.307446	0.163409	-0.171238	0.0477904	-0.0530181	0.287025	-0.0138692
Nilotinib	-0.0223681	0.0167686	-0.0106421	-0.107258	0.0871618	0.0928405	-0.155898	0.0286215	0.0126718	0.104552	-0.0999067	-0.0860414	0.0946262	-0.0156769	0.0990505	0.013112	0.0244424	0.00270271	0.116115	-0.103624	-0.187883	0.0910289	-0.0948569	-0.0358423	0.0741622	-0.0251553	-0.113157	0.145675	0.026227	-0.0362166	-0.177365	-0.0385339	-0.156698	0.0927647	-0.0643397	-0.103771	0.084632	0.0349661	-0.0644203	-0.0530334	0.0900655	0.00260039	-0.11471	0.00335242	0.0312438	-0.0172972	-0.0220569	0.139831	-0.0844249
NSC.87877	-0.074222	0.111375	-0.109999	-0.0908814	0.103233	0.0648862	0.131257	-0.0433101	-0.0804755	0.0819393	0.0158043	0.0616942	0.105158	0.0298986	0.0657498	-0.113288	-0.0111589	0.00259071	-0.00193703	-0.0391411	0.0720362	0.0132958	-0.0470284	-0.0151038	-0.00700334	0.00396795	0.0595766	0.0612628	-0.0610313	0.114955	-0.00281396	0.0775503	0.0430561	0.051984	-0.00915355	0.0659214	0.0432686	0.0200164	0.00283252	0.0437618	-0.064138	-0.00704385	-0.0441377	-0.0256679	-0.0828994	-0.0114476	0.0280614	0.0188836	-0.0234584
NU.7441	-0.0101314	0.0126072	-0.0368023	0.0533669	0.0238348	-0.0446552	0.166012	0.0344926	0.126985	-0.0493728	0.0495031	0.0409233	-0.108724	0.0695403	0.0339185	0.0421447	0.0232936	0.0126505	0.0497633	-0.074874	0.0755949	-0.0623736	0.0289029	0.0535924	-0.0509313	0.0313712	0.0496856	-0.0130398	0.0421752	0.00871012	0.0199686	-0.03287	0.0306199	-0.0111519	0.0504918	-0.0462964	-0.0389792	-0.0395855	0.0783669	-0.0457602	-0.038719	-0.0235573	-0.11713	-0.0882806	0.000294261	0.0408553	-0.000725566	-0.0399959	0.0792006
Nutlin.3a	-0.462965	0.131642	-0.505606	-0.432562	0.0641529	-0.0213782	-0.0103301	0.173854	-0.094405	0.224472	-0.132442	-0.0400807	0.126326	-0.319775	0.293797	-0.0520176	0.0297046	0.123863	0.16421	-0.039145	0.196962	0.152746	-0.295085	-0.316821	0.200372	-0.201779	-0.175602	0.00690803	-0.3524	-0.761255	-0.285363	-0.944094	-0.44323	0.0701838	-0.10675	0.087172	0.171635	-0.117048	-0.653277	-0.344882	0.00861451	0.20287	-0.174622	0.0741828	-0.18937	-0.400607	-0.0235615	-0.248169	0.0394691
NVP.BEZ235	-0.139555	-0.0979737	-0.06155	-0.279529	-0.186805	-0.0205066	-0.0562036	-0.39966	-0.139273	0.0537552	-0.387216	-0.200009	-0.208488	-0.192225	-0.139195	-0.228957	-0.100165	-0.10061	-0.120195	-0.199294	-0.0543546	-0.0962312	-0.159199	-0.185206	0.0324473	-0.243023	-0.212466	-0.225264	-0.395014	0.0465853	-0.261106	0.12449	-0.128424	-0.0610864	-0.152072	-0.237739	0.0284817	0.0707769	-0.255821	-0.131643	-0.180773	-0.0386281	-0.121217	0.12501	0.0332136	-0.258615	-0.0245042	-0.0651984	-0.0251211
NVP.TAE684	-0.0472731	-0.014733	-0.0267265	-0.0128917	-0.0147877	-0.0208817	0.0403034	0.0872192	-0.00556303	-0.11307	-0.0250271	-0.00764003	-0.00385525	0.0657289	0.00592424	0.0126812	0.0195616	0.0379318	-0.0634677	0.0721955	-0.0251281	0.0489016	0.0662238	-0.019333	-0.0179866	-0.0569901	0.0047725	-0.0551776	0.0077614	-0.0955187	-0.0182077	-0.0298028	-0.0278531	-0.0426275	-0.028905	0.0012654	-0.0192708	-0.0578073	-0.0323981	0.000651181	-0.0245391	-0.0188138	0.0608879	-0.0967185	0.0262601	-0.0359034	0.0084656	0.0243988	0.0666901
Obatoclax.Mesylate	0.524561	-0.0694979	0.0376741	0.19218	0.38612	-0.0419313	-0.0427232	0.307437	0.202151	0.0690958	0.225396	-0.239669	0.125157	0.123709	0.175944	0.081126	0.215123	0.245124	0.285809	-0.105912	0.254922	0.198233	-0.0756828	0.0466086	0.501999	0.258279	-0.0453471	0.487401	0.180782	-0.601726	0.375359	0.0569821	0.134977	0.2473	0.0276045	0.288741	-0.0541195	0.0643017	0.107514	0.239921	0.367459	0.312126	-0.0490004	0.0827571	0.0777531	0.101173	0.0866418	0.281678	-0.0568605
OSI.906	-0.111372	-0.0756649	0.0236392	-0.425776	-0.352907	-0.62119	-0.229839	0.0021323	-0.917192	-0.17394	0.0525192	-0.478231	0.170059	-0.380189	-0.392299	0.00948978	-0.0940086	0.00909082	-0.446942	-0.210813	-0.245632	0.0877633	-0.074226	-0.408772	-0.0870029	-0.142812	-0.177633	-0.271744	-0.175718	-0.265096	-0.11418	0.0636358	-0.175498	-0.193498	-0.577911	-0.114742	0.453085	0.147033	-0.739308	0.529288	-0.492757	-0.274891	0.227908	-0.113662	-0.463162	-0.0737871	-0.282786	0.219515	0.0877791
PAC.1	0.287033	0.206997	0.271063	0.282327	0.0621775	0.346845	-0.020944	0.445977	0.110855	0.88066	0.174079	0.314481	0.216925	0.396413	0.0453269	-0.157482	0.435718	0.150996	0.299585	0.325819	0.0430583	0.483627	0.0440974	-0.00620435	0.54729	0.168224	0.0215581	0.321139	0.146421	0.0997906	0.109044	0.0720673	0.231388	0.421631	-0.116998	0.0887971	0.0849066	0.400681	0.151842	0.413135	0.646153	0.304818	0.0086826	0.203877	0.345387	-0.145916	0.46315	0.112495	0.316018
Paclitaxel	-0.103533	-0.00760221	0.221237	-0.189765	-0.0112521	-0.0151579	0.00876376	-0.320594	0.394272	-0.106891	-0.0502644	-0.244529	-0.257459	-0.201172	-0.188713	-0.391125	-0.167303	-0.103384	0.471768	-0.136374	0.00243727	-0.0389306	-0.349984	-0.00240875	0.124304	0.170572	0.0862102	0.0166813	-0.185905	0.298041	0.00522732	0.327813	0.02493	-0.143899	0.00108925	-0.0396957	0.0913886	0.0340978	-0.0324275	0.0397178	-0.101883	0.205028	0.0148257	0.241707	0.477351	0.11266	-0.083233	-0.136206	-0.130025
Parthenolide	-0.0232012	0.0139227	-0.0116625	0.0165887	0.0283528	-0.0168895	0.0684142	0.00744602	-0.0102555	-0.00689745	-0.0369496	0.00344206	-0.00375749	-0.00670602	0.0386823	0.0127129	-0.00235511	0.0192737	-0.0504584	-0.0312376	0.0375987	0.00591214	0.0109615	0.00609089	-0.0116792	0.00754171	0.0234867	0.000616061	-0.0177507	-0.0089637	-0.010504	0.00978997	-0.00666123	-0.011621	0.00906386	-0.0134539	-0.00953115	-0.00991788	0.019831	0.0147747	-0.0227866	-0.0010669	-0.0225466	-0.00931937	-0.0160662	0.0190052	0.0061986	0.00695588	-0.027005
Pazopanib	0.228461	0.122621	0.08045	0.11832	0.0297009	0.11999	0.0049646	0.0125409	-0.130287	0.182715	0.183956	0.352831	-0.0495139	0.0765946	-0.0750895	0.191528	0.159729	-0.0192939	-0.349724	0.131498	-0.049289	0.180676	0.18286	0.175987	0.185565	0.141508	0.193154	0.0638161	0.312868	0.0984038	0.0856456	0.0876185	0.0514231	0.0711655	0.095107	0.0377356	0.194921	0.00950166	0.0360108	0.166626	0.0588787	-0.0833098	0.260873	-0.0733438	-0.153127	0.0812919	0.0394972	0.0757381	0.0199466
PD.0325901	0.41994	0.170763	0.0962285	0.110307	-0.0400662	0.422032	-0.0398074	-0.222524	0.261245	0.142826	0.0283621	-0.0852554	0.0681024	0.21354	-0.00323144	-0.400163	0.189057	-0.104176	0.0884716	-0.148521	-0.39357	-0.247238	-0.469504	-0.265337	-0.212106	0.149236	-0.236766	0.236622	-0.389152	-0.0348921	-0.158909	-0.390455	0.086419	0.217633	0.140176	-0.15451	-0.493259	0.0123229	0.529543	-0.388027	0.225993	0.173575	-0.349016	-0.263242	0.0041491	-0.341008	0.204634	-0.705799	-0.113844
PD.0332991	0.138197	-0.211727	0.34284	0.451562	0.169155	-0.247335	0.143417	-0.142536	0.0188535	-0.254191	0.277262	-0.124802	0.0550689	0.127749	-0.117992	0.463535	0.0389874	0.139034	0.170902	0.163998	0.0255302	0.405836	0.503837	0.316172	0.24493	0.245551	0.414744	0.234282	0.372667	0.347745	0.390705	0.383739	-0.0458047	-0.514432	0.0715008	0.159734	0.284114	-0.0534736	0.135294	0.386032	0.143256	-0.261091	0.551062	0.129154	0.0823057	0.331615	-0.190423	0.216438	-0.201498
PD.173074	0.0573716	0.0309041	-0.138954	-0.100953	0.0780706	0.0295941	0.0385291	-0.0246849	-0.119751	0.188254	-0.00786184	-0.112363	0.0730433	-0.0447548	-0.0942674	-0.0202035	-0.0898103	-0.039261	0.145461	-0.147893	0.0750696	-0.11615	-0.079126	-0.0208988	-0.059216	0.0598562	0.0578523	0.0654415	-0.0541232	-0.0434399	0.00847865	0.106567	0.122485	0.111899	-0.1369	-0.0409931	-0.097237	-0.0493171	-0.0366864	-0.0654258	0.10318	0.0449454	-0.0924347	-0.0375655	-0.221153	0.0777681	-0.016312	-0.12708	0.0514094
PF.02341066	0.171114	0.135494	0.246854	0.11216	-0.147937	-0.0470577	-0.030252	0.09608	-0.0523234	0.0611354	-0.166744	0.0890695	-0.0508235	0.108258	0.231916	-0.0175975	0.139269	-0.0250954	-0.256949	-0.0391112	-0.0933678	-0.106338	-0.00478442	-0.0588559	0.104329	-0.175903	0.0829978	0.0146527	-0.0122536	0.00182874	-0.0968877	0.0372533	-0.166804	0.00105272	0.117216	-0.147029	-0.132604	0.064464	0.140579	0.16644	0.0128242	-0.0910518	-0.159248	0.0609147	-0.0498511	-0.0243728	0.14876	-0.0657253	0.0940911
PF.4708671	-0.00172345	0.0869489	-0.0145464	0.041293	-0.00466379	-0.00369774	0.0298209	-0.0209648	0.0448263	-0.0100674	-0.013539	-0.0169737	0.0444069	-0.0295267	0.00769493	-0.0447466	0.0360995	-0.0312201	0.0234422	-0.0392406	-0.00991534	-0.0451827	-0.0343471	-0.0246593	0.00458148	-0.0389432	0.0487806	0.0095863	-0.0198257	0.0424279	0.00174881	0.0195901	-0.0349829	0.0171046	0.0432262	-0.0158615	0.0289316	0.0894216	0.00238875	0.00992796	0.0180461	-0.0275868	-0.122129	-0.0123505	-0.0602446	0.034132	-0.0203286	0.0149905	0.0222376
PF.562271	-0.222612	-0.0369792	0.0441126	0.193567	-0.260925	0.00229497	-0.00833731	0.157274	-0.0186834	0.113222	-0.0239019	0.165005	-0.143208	0.150871	0.286828	0.133347	0.151967	-0.0553044	-0.093679	0.0646119	0.0742133	0.0603032	0.0877541	-0.0146055	-0.0973849	-0.0264401	-0.0627233	0.03925	0.0248795	-0.176589	-0.13082	0.0860083	0.0322223	0.0387557	0.0313525	-0.0425659	0.0595784	0.00562219	-0.0176295	0.118373	0.188503	-0.153179	-0.0223583	0.0649149	0.0576417	-0.00780572	0.0882728	-0.178922	-0.0642175
PHA.665752	0.0400388	-0.0200864	0.0572096	0.0818576	-0.0863125	-0.0426942	-0.012968	0.257758	-0.104486	0.00626195	-0.0560133	-0.0365232	0.0146868	0.0773451	0.0808163	-0.0316753	0.0832638	0.0274571	-0.0630973	0.12261	-0.0228534	0.13535	0.0548378	-0.0178953	0.0859431	-0.0385313	-0.0393191	0.0344318	0.010865	-0.202422	0.0296851	-0.0999572	0.0164439	-0.0280855	0.0112012	-0.0321528	-0.0675011	0.00645092	0.0342683	0.0500878	0.0289194	0.0376843	0.0101256	-0.012489	0.0109308	-0.176445	0.113816	-0.0686917	0.0516802
PLX4720	-0.19609	-0.0390533	-0.0970685	-0.355943	-0.0770381	-0.0460408	-0.039204	-0.0125327	0.124324	-0.409303	0.0473589	0.301291	-0.0686941	-0.0901209	0.0221892	-0.0114777	-0.437008	0.0675529	-0.00501462	0.165447	0.085077	-0.269803	0.134516	0.219204	-0.176159	0.0249217	0.235333	-0.177162	-0.0278053	0.244599	0.182947	-0.0449617	0.173289	-0.114636	0.0804414	0.261489	-0.0755487	0.143788	0.0790078	0.0101166	-0.0340133	0.203258	-0.191214	0.10115	0.300326	0.118096	-0.0899449	-0.0511879	0.123588
Pyrimethamine	0.171965	-0.0333665	-0.00774945	0.177202	-0.0444145	0.0557053	-0.189985	0.110015	0.0764381	0.135342	0.183315	0.0204453	0.165231	0.153843	0.107022	0.0878121	0.180821	0.0487983	0.0438952	0.0417835	-0.101051	0.118184	-0.00707612	-0.0293114	-0.0159582	0.0200944	-0.00863592	0.163088	0.100354	-0.05778	-0.0171344	0.109788	0.0044144	0.197421	0.0824172	-0.00560138	-0.0222299	0.0697882	0.184786	-0.0637048	0.0968133	-0.0361813	0.127452	-0.0934373	-0.00296931	-0.0254816	0.21961	0.0651407	0.0788088
QS11	0.190679	-0.0960147	0.224833	0.22125	0.114876	0.0259826	0.0985935	-0.00473676	0.234254	0.109746	0.135148	0.147827	0.0203354	0.137157	-0.00778308	0.145248	0.153755	0.0730847	0.0611349	-0.0565734	0.0642966	0.0661526	0.208534	0.20318	0.0316533	0.147312	0.168699	-0.119	0.138265	0.0872374	0.0624642	0.0172951	0.0167068	0.0444883	0.100625	0.0662652	-0.0154754	0.114553	0.0547577	-0.0627364	-0.0233493	0.240072	0.190964	0.2483	0.264221	0.0990082	0.0399049	-0.058549	0.259576
Rapamycin	-0.0679572	-0.0108434	0.0258639	0.0663645	-0.00467572	-0.185307	0.0754993	0.157598	-0.172092	0.0654555	0.0137067	0.234306	-0.137063	0.250228	0.0817804	0.208	0.142586	0.0674506	-0.159265	-0.0932464	0.0358924	-0.00385308	0.194367	0.0670208	-0.0236902	0.193029	0.0488361	0.00661097	0.0528919	-0.0847059	0.126721	0.224197	0.186497	-0.106069	0.0541121	0.0690305	-0.202576	0.0854928	0.158287	0.0600907	-0.0634724	-0.0252808	0.156689	-0.0858159	-0.0406143	-0.0357934	0.0135513	-0.0759617	0.127248
RDEA119	0.333707	0.00530614	-0.0922061	0.0357418	0.150468	0.556387	-0.0436414	-0.31082	0.103344	0.307675	0.0905736	0.230289	0.377291	0.228256	0.0789929	0.0878115	0.151266	-0.216777	-0.173901	-0.292421	-0.436616	0.0432393	-0.115263	-0.248644	-0.100278	0.0915149	-0.0711836	0.226695	-0.224044	-0.148851	-0.217688	-0.337305	-0.359954	0.407857	0.288025	-0.326429	-0.0761903	0.0568207	0.292476	-0.583174	-0.0857025	0.358375	-0.377968	-0.264539	-0.303834	-0.283878	0.259359	-0.58361	-0.115469
RO.3306	0.181919	0.0709669	0.0673198	0.287593	0.23312	0.298784	-0.180166	-0.0799513	0.101048	-0.136557	0.211028	0.103699	0.209508	0.0637199	0.197848	0.0965502	0.113562	0.0805742	0.0094257	0.225544	-0.100249	0.219758	0.101426	-0.0354233	0.0614	0.00412295	0.027754	0.0809243	0.106094	0.201242	-0.0744968	-0.0561394	-0.0816977	0.0903567	0.0863128	0.0297879	0.143922	0.144441	0.115524	0.182295	0.154481	0.261987	-0.0319729	0.275393	0.0531295	0.116904	0.258453	0.132979	0.037828
Roscovitine	-0.00111747	-0.0160239	-0.0175098	0.00237403	0.0162726	-0.0106085	0.0158883	-0.0113139	-0.0188807	-0.0119012	0.0128397	0.0244767	-0.0210853	-0.0129339	-0.00441163	0.00474902	0.00939205	0.0105257	0.00557789	-0.024398	-0.00410007	0.0144621	0.0191711	0.00549979	-0.0319437	0.0203267	-0.00392322	-0.01524	0.00539351	0.0106754	-0.00851434	-0.0447163	0.021157	-0.0175971	0.0176998	0.0106839	-0.0223568	-0.0106985	-0.000932468	-0.0125461	-0.00482657	-0.000174822	-0.0139132	0.0174283	-0.000365016	-0.0139314	-0.0186534	0.00189608	0.00111128
Salubrinal	0.0475437	-0.0323294	0.0824612	0.0993316	-0.108019	-0.0318971	0.0127333	-0.00745896	-0.0104858	-0.0183683	0.0252693	-0.0279185	0.0168797	-0.0331682	0.0417184	-0.0246794	0.0755693	-0.079148	0.0303765	0.0297997	-0.0229054	-0.0134758	0.00938661	-0.00191703	-0.0391893	-0.00267533	-0.0359035	-0.0339274	0.0193923	0.0153424	0.0874452	0.0256605	0.0452124	0.011991	0.00164837	0.0237107	-0.0256968	0.045732	0.0578593	0.0650804	-0.0169528	-0.0429808	-0.0797521	0.0466656	-0.0158039	-0.024382	0.0162521	0.000795649	0.0500105
SB.216763	0.163294	0.163446	0.109277	0.0679261	0.169098	-0.0478521	0.142898	0.168354	0.174041	-0.29289	0.0876015	-0.120922	0.178377	-0.159402	-0.0210818	-0.0479261	0.0117713	0.345266	0.35972	0.155267	0.104073	0.0138383	0.071933	0.104858	0.293584	0.118375	0.187412	-0.00555536	0.0958084	0.102821	0.0781657	0.193564	0.0715269	0.0911804	0.11932	0.241839	0.198079	0.209936	-0.0230987	0.254245	-0.042084	0.248504	-0.0414532	0.262257	0.249508	0.161157	0.0377665	0.310049	0.17512
SB590885	-0.358596	0.140375	-0.134691	0.15904	0.141716	0.0433076	0.193399	-0.0316578	-0.0214998	-0.125475	0.1899	0.394201	-0.135553	0.15666	0.417579	0.0316297	-0.00279026	0.186798	-0.000198214	0.149976	0.112948	-0.0104626	0.144006	0.231132	0.0935702	0.0992427	0.202603	0.0310417	-0.0773154	0.0733681	0.272875	0.00982029	0.342469	-0.101096	0.247066	0.226176	0.132223	0.0990544	-0.00841025	0.182715	-0.0245051	-0.0575159	0.0705539	0.0828127	0.330315	-0.18054	0.0913631	0.255337	0.349634
Shikonin	-0.277277	0.0297866	-0.145422	-0.0369862	-0.169198	-0.0271289	-0.136439	-0.206256	-0.0929381	-0.0146435	-0.008368	-0.016632	-0.0381896	-0.119567	-0.171032	-0.00878553	-0.228614	-0.148771	0.188491	0.350109	-0.211981	-0.303601	0.100762	-0.0892142	-0.392788	-0.014856	-0.285374	-0.0166479	-0.0487967	0.234264	0.0778172	0.0625872	-0.115301	-0.203881	-0.275658	0.0984108	-0.102534	-0.0154522	-0.0798984	0.189689	0.0793122	-0.151648	-0.351833	0.290565	0.189683	0.159307	0.0654989	0.228647	-0.09768
SL.0101.1	-0.0363525	-0.0272162	-0.173393	0.0652535	-0.0154256	-0.0107508	0.0667017	-0.0834492	0.0043724	-0.132957	0.0439047	-0.212934	0.0771498	-0.0821633	0.157689	0.0100257	0.0936111	-0.0652165	-0.0353254	-0.114049	-0.0127611	0.0256218	-0.0201625	-0.0925524	-0.0209907	-0.009441	-0.000856309	-0.0825143	-0.185078	0.0228184	0.0662631	-0.0520419	0.110634	0.0383999	0.019538	-0.0657284	0.0923603	-0.0456473	-0.0790006	-0.105828	-0.0306134	0.00753215	-0.0612256	-0.000225272	-0.206374	0.00815413	0.0360603	0.0308778	-0.0118784
Sorafenib	0.00103616	-0.022835	0.0277287	0.122239	-0.106657	0.0506051	0.049787	0.050143	0.0117886	-0.0026791	0.010038	0.16207	-0.0257982	0.0733082	0.0559999	0.0871986	0.0105408	-0.00321095	-0.0105521	-0.0373572	-0.00884252	0.07594	0.0396741	0.061353	0.0138059	0.0282709	-0.0211726	0.0126992	0.0462299	0.103149	0.0274874	0.0738219	0.0557938	0.0752649	0.034218	0.0650527	-0.0128698	-0.0404302	0.126854	0.0358345	-0.0356266	-0.015224	-0.0335082	0.0240787	0.0334453	0.060158	0.0582452	-0.00843871	0.069428
S.Trityl.L.cysteine	0.0279895	-0.0980024	-0.127841	8.57101e-05	0.14117	0.0485453	0.116114	-0.176046	0.0817476	0.0667016	-0.152824	0.0289361	0.272941	0.0147257	0.279858	-0.119399	-0.054891	-0.00194035	0.0134885	-0.0261362	-0.0617258	0.0147729	-0.313673	0.0550231	-0.0680942	-0.0816268	0.0678022	0.0768068	-0.0859149	0.0140196	-0.155448	0.0242948	-0.151811	0.0792453	-0.00549247	-0.0333003	-0.0518313	0.0882386	0.0777607	0.0150216	-0.165746	0.141718	-0.145632	-0.234352	0.0288662	0.183548	-0.0213736	-0.0266743	0.0764833
Sunitinib	-0.276668	-0.218591	-0.0405289	0.204121	-0.210397	-0.309427	0.143196	0.187426	0.0716345	-0.0880369	-0.297633	0.205605	-0.283592	0.0820005	-0.0236226	0.102303	0.0877102	0.00457672	-0.192298	-0.056023	-0.0667742	0.0239464	0.256498	0.184594	0.269377	0.295671	-0.201725	0.00229605	-0.0112416	-0.0661448	-0.051602	0.339214	0.01343	-0.362264	-0.109026	0.238429	-0.0526813	-0.164579	0.0231723	0.0393083	0.189069	-0.177748	0.206451	-0.0880157	-0.0273302	-0.202801	-0.234991	0.111717	-0.162281
Temsirolimus	0.383326	0.547541	0.0778391	0.233521	-0.325669	-0.0313619	-0.000468936	0.165607	-0.0774118	0.190699	-0.195258	0.208074	0.103976	-0.03424	0.312623	0.419145	0.184744	-0.0410538	0.0206778	-0.210398	-0.0348736	0.0106724	0.195433	-0.0108345	-0.397803	0.178936	-0.0765454	-0.0309335	-0.0912292	-0.0311183	-0.00800475	0.351988	-0.0445217	-0.0732348	-0.0664903	0.144474	-0.101393	0.227197	0.177351	0.178113	-0.149028	0.0041664	0.0925187	0.197501	-0.134366	0.51416	0.095909	-0.140973	0.138501
Thapsigargin	0.773583	0.520056	-0.416721	-0.115283	1.03649	0.309032	-0.405189	-0.00810308	-0.246515	0.62265	0.435843	0.467897	0.809058	-0.393298	-0.682261	0.344769	-0.047768	-0.174724	0.0740149	0.48572	0.0883716	0.411106	0.477571	0.323693	0.641675	0.105716	0.399438	-0.19119	0.0725781	-0.379084	0.429047	-0.109643	0.101864	0.0248548	-0.388145	0.347396	0.62731	0.0937013	-0.785926	0.291849	0.33796	0.097136	-0.493948	1.07458	-1.00806	0.230216	-0.0160992	1.34174	0.269505
Tipifarnib	0.225876	0.057691	5.47569e-05	0.230168	-0.0125113	0.0185175	0.266146	0.107564	-0.00139155	-0.0698022	0.0267492	0.0376468	0.0157198	0.299546	0.147558	-0.233734	0.138601	0.000516628	-0.151913	0.264371	0.0263023	0.0381943	-0.125752	-0.272938	0.158216	-0.156683	-0.162084	0.0182057	-0.0922357	-0.172992	0.0255224	0.132759	-0.161724	0.0484857	-0.0424352	0.00423341	0.00878015	0.0115758	0.24394	0.194043	0.0463737	-0.0317053	-0.0567488	-0.0287708	0.0378291	-0.24191	0.0987816	-0.235719	0.222437
TW.37	-0.3203	-0.0241209	-0.105757	-0.157293	0.0514982	-0.0078958	0.0944228	-0.0823188	-0.0272735	-0.35572	-0.202916	0.0156641	0.133667	-0.230576	0.10631	-0.133002	-0.074412	-0.170129	0.105532	0.269745	-0.318387	-0.0506288	-0.296069	-0.0590781	0.00105328	-0.0644095	-0.0693618	0.0311471	-0.155302	0.0162589	-0.0986946	0.0892119	-0.180121	-0.0871061	0.0147187	-0.203307	0.104731	0.0989879	-0.0732879	-0.186605	-0.29915	0.101076	-0.261408	-0.211852	0.0560428	-0.11362	-0.143464	-0.10772	0.000573881
Vinblastine	0.143739	0.211361	0.084042	0.030775	0.210458	-0.121856	0.107114	0.23024	0.0504263	-0.0459617	0.167633	0.0481298	-0.356193	-0.0465691	0.222106	-0.110065	0.0401199	0.13782	-0.0785551	0.252321	0.0205152	0.130626	0.0205775	-0.00756773	-0.103519	0.281593	-0.0707506	-0.105096	0.263975	-0.0381868	0.155211	0.807192	0.202451	0.0205534	0.150089	0.0654924	-0.0985048	-0.0527347	0.368548	-0.0163516	-0.0317702	0.19295	-0.00533408	-0.0253097	0.428761	0.622904	-0.00732439	-0.0405393	-0.0284777
Vinorelbine	0.0367906	0.166513	0.0476863	-0.374349	0.0551084	-0.0914196	-0.0251123	-0.0218275	0.0981439	0.168398	-0.0433091	0.0393756	0.239078	0.00803365	0.139191	-0.213674	-0.134592	0.0462424	-0.0804786	0.144523	-0.0479987	0.367224	0.0186585	-0.0531292	0.0367358	0.0494077	0.150601	-0.250988	-0.0279632	0.133631	0.0544785	0.535737	0.0618782	0.0589274	0.260186	-0.109269	0.336887	-0.0270507	0.0670431	0.206775	-0.394768	0.278737	0.0644296	0.219013	-0.0308011	0.0998793	0.0250359	0.361796	0.154522
Vorinostat	0.0579286	0.0152229	-0.140081	-0.0365409	0.0443398	0.18604	-0.000128978	0.0350888	0.0384409	-0.12251	0.0872975	0.016087	-0.0901054	-0.044545	-0.0256078	0.07173	-0.0536182	0.0089374	0.120912	-0.0139727	-0.0237911	-0.0499778	-0.0492005	0.0568632	0.00649764	0.0441224	0.194423	-0.061812	-0.0139051	0.0675466	-0.015542	-0.0341235	-0.0411006	0.0149871	0.0379623	0.052238	0.0665474	0.00785198	-0.11899	-0.0763336	0.0174089	0.0679485	-0.00396723	-0.0163611	-0.111726	0.0111944	-0.025632	-0.0198623	-0.0751934
VX.680	0.00567393	-0.0262317	-0.104255	0.122891	-0.0500507	0.0303435	0.234275	-0.0428761	0.0533555	0.00381347	-0.0391465	-0.0763308	-0.0142356	-0.121665	-0.00768443	-0.0726428	0.0355892	-0.0516958	-0.0687223	0.199702	-0.005427	-0.0415075	-0.0487937	-0.0884771	0.150563	0.0615943	-0.0583206	-0.0578272	-0.0888178	0.118365	0.186603	0.158137	0.0705318	-0.0823518	-0.0234686	0.17154	0.0823486	-0.106553	0.0139805	-0.0409326	0.0338471	-0.0976506	-0.0328058	-0.080794	-0.115062	-0.0303094	-0.288356	0.110121	-0.0380126
VX.702	-0.142688	-0.0396564	0.00916518	0.00650078	-0.0467958	0.109887	-0.0499144	0.0386719	0.0881955	-0.134904	-0.0187537	0.0199297	-0.0788968	0.0347806	0.0494866	-0.0716553	-0.0400623	-0.00227511	0.0855364	-0.029981	0.041027	0.0098093	-0.00970444	0.114856	0.0703328	0.130144	0.0635661	-0.0142247	-0.0861589	-0.0385388	0.0107088	-0.0439066	0.0440142	-0.000694847	-0.126043	0.0568052	0.00429446	0.0412517	-0.00622665	0.000776613	0.0435708	-0.0237857	0.0357332	-0.0132517	0.0779611	-0.0831771	0.0248361	0.0552895	0.031636
WH.4.023	0.422905	0.189144	0.115374	0.164031	0.10731	0.138482	0.157207	-0.0634885	0.0247421	0.0317485	-0.0158186	-0.244531	0.2373	-0.0382098	0.413218	-0.253331	0.17952	0.328368	0.00647795	0.479466	-0.0322687	0.175825	0.16327	0.182521	0.114633	0.2661	0.232089	-0.132184	0.503063	0.266214	0.445742	-0.189698	0.163683	0.281589	0.262045	0.406273	0.365949	0.0880809	0.220033	0.057704	-0.00548676	0.102851	-0.0356227	0.279457	0.245869	0.259964	0.0938178	0.251852	-0.115811
WO2009093972	0.0410653	0.154939	-0.112612	0.00270731	0.0121707	0.0726929	-0.0465334	0.0815155	-0.114882	-0.0418949	-0.0628221	0.0206041	0.186286	-0.0482124	0.00628958	-0.0510968	0.0822844	-0.0461088	0.0232215	0.145898	0.0724957	0.00276663	-0.0751788	0.0324609	-0.0363241	0.0722814	0.0703954	-0.0564838	-0.0685035	0.114341	0.11386	-0.19083	0.0464187	0.0913448	0.0583927	0.108573	-0.0612994	-0.00277596	0.00358126	-0.0911027	0.0135591	-0.00277618	-0.407124	0.0509206	-0.165493	0.163265	-0.036943	-0.0710626	0.0302772
WZ.1.84	0.0857496	0.0445891	-0.0403038	-0.000820627	0.264328	0.0824702	-0.0899149	0.0228075	0.185822	-0.0690332	0.263737	-0.0035957	-0.106308	0.0413168	-0.0475608	0.0811755	0.0631176	0.024864	0.0846489	-0.00182535	0.125624	-0.302375	0.0768099	0.184044	0.172338	0.103602	0.0180317	0.0963118	0.0920755	0.0606028	0.0884726	0.198926	0.0601838	0.0998807	-0.0856914	0.153147	0.0517261	-0.281204	-0.0597674	-0.0860484	0.131726	-0.0745096	0.163435	-0.21729	-0.0668153	0.219718	-0.0945893	-0.0963206	-0.220486
X17.AAG	-0.183206	-0.0400221	0.011747	-0.586158	0.26589	0.269932	-0.759374	-0.528193	0.266285	-0.668609	0.428492	-0.126917	0.486874	-0.429514	-0.600767	0.62032	-0.903182	-0.134875	0.950354	0.5703	0.46743	-0.112658	0.280344	0.217455	-0.621935	-0.0399869	0.0913757	-0.0368147	-0.267082	0.479531	0.278876	-0.563759	0.406368	0.423021	0.13323	0.208243	0.0904576	-0.407532	-0.463761	-0.286751	0.121258	0.390757	-0.555687	0.448672	-0.193963	0.955803	-0.18823	0.224367	-0.137796
X681640	0.149273	0.19588	0.0657894	0.0393664	-0.0512155	-0.120763	0.202094	-0.172332	-0.230911	0.827219	0.174968	0.127861	0.121096	-0.0343869	0.251583	0.144564	0.00815389	0.126861	-0.210851	-0.383999	-0.0156351	-0.137696	0.232418	0.0627919	0.180378	0.11426	0.228149	-0.0951982	0.00488206	-0.184513	0.103235	-0.527888	-0.137407	0.199725	0.2365	-0.315451	0.0944213	0.079824	0.064056	-0.172928	-0.0315866	-0.00233729	0.000942967	-0.0087156	-0.0271993	-0.404623	0.0873811	-0.109198	0.191687
XMD8.85	-0.063437	-0.0626762	0.00125011	-0.100517	-0.0154508	-0.0352279	-0.0903856	-0.0952134	0.0469076	-0.00726277	-0.0900327	0.0880641	0.0351006	0.0156799	0.0641	-0.0652011	0.0284621	-0.0271285	-0.13518	-0.0409981	-0.071036	-0.0412078	0.00926472	0.00497509	0.0184433	-0.0211733	0.0221929	-0.0979115	-0.142486	0.0440706	0.0264141	0.114115	0.0123876	-0.023905	0.0852575	-0.0363253	0.0573346	0.0748635	-0.0160842	0.0615755	-0.0419129	0.0109637	0.0904851	0.0672636	-0.0452952	-0.0682394	-0.0713276	-0.0400504	0.0735546
Z.LLNle.CHO	0.034538	0.171346	0.211974	-0.0148945	-0.238398	-0.0164122	0.0336193	0.233874	0.0756959	-0.208754	-0.0348553	0.0749621	-0.0409965	0.0354519	0.138581	-0.00917315	0.125758	0.105788	-0.0742231	0.0311365	-0.0588255	-0.124965	-0.0291808	-0.00921273	0.14495	-0.0880746	0.0565105	-0.0582454	0.00359154	0.0681979	-0.0936379	0.27903	-0.0669148	-0.0155829	-0.0410629	-0.00148122	0.0254355	0.156834	-0.0908628	-0.00851092	-0.101959	0.0726309	0.158808	-0.0661496	0.125522	0.0393144	-0.0424722	-0.0212083	0.104517
ZM.447439	0.0308159	0.0525069	-0.0226517	0.053346	-0.0917192	0.0539535	-0.10921	0.0570903	0.0826867	0.0379492	0.23968	0.126498	0.343834	0.118113	-0.00277846	-0.0487621	0.0373847	0.121897	0.417296	0.383611	0.107189	0.221052	0.0441241	0.0837877	-0.102658	0.172781	0.0173353	0.075223	0.168108	0.220051	0.333534	-0.087218	0.263479	0.136487	0.203528	0.311397	-0.493322	-0.193806	0.129305	0.149634	-0.175749	0.369695	-0.120785	0.106465	0.0100418	0.136364	0.152021	0.0699885	0.302044
[truncated: 5,000 more columns]
